# Supplementary material for: Semisynthesis, Biological Evaluation and Molecular Docking Studies of Barbatic Acid Derivatives as Novel Diuretic Candidates
Source: Molecules. 2023 May 10;28(10):4010. doi: 10.3390/molecules28104010 (PMC10222548; doi:10.3390/molecules28104010)
Supplement: Supplementary file 1 [file molecules-28-04010-s001.zip › molecules-2355306-supplementary.pdf]

## Supporting Information

# Semisynthesis, Biological Evaluation and Molecular Docking Studies of Barbatic Acid Derivatives as Novel Diuretic Candidates

Xiang Yu <sup>1,2,†</sup>, Yi Sui <sup>1,†</sup>, Yinkai Xi <sup>1,†</sup>, Yan Zhang <sup>1</sup>, Guoyong Luo <sup>1</sup>, Yi Long <sup>1</sup> and Wude Yang <sup>1,2,\*</sup>

- <sup>1</sup> College of Pharmacy, Guizhou University of Traditional Chinese Medicine, Guiyang 550025, China; yuxiangjx@126.com (X.Y.); suiyi041@gzy.edu.cn (Y.S.); xyk\_xyt@163.com (Y.X.); zhangyan0003@gzy.edu.cn (Y.Z.); ft420038851@163.com (G.L.); longyi621@gzy.edu.cn (Y.L.)
- <sup>2</sup> Guizhou Joint Laboratory for International Cooperation in Ethnic Medicine, Guizhou University of Traditional Chinese Medicine, Guiyang 550025, China
- \* Correspondence: ywd\_680708@sina.com
- † These authors contributed equally to this work.

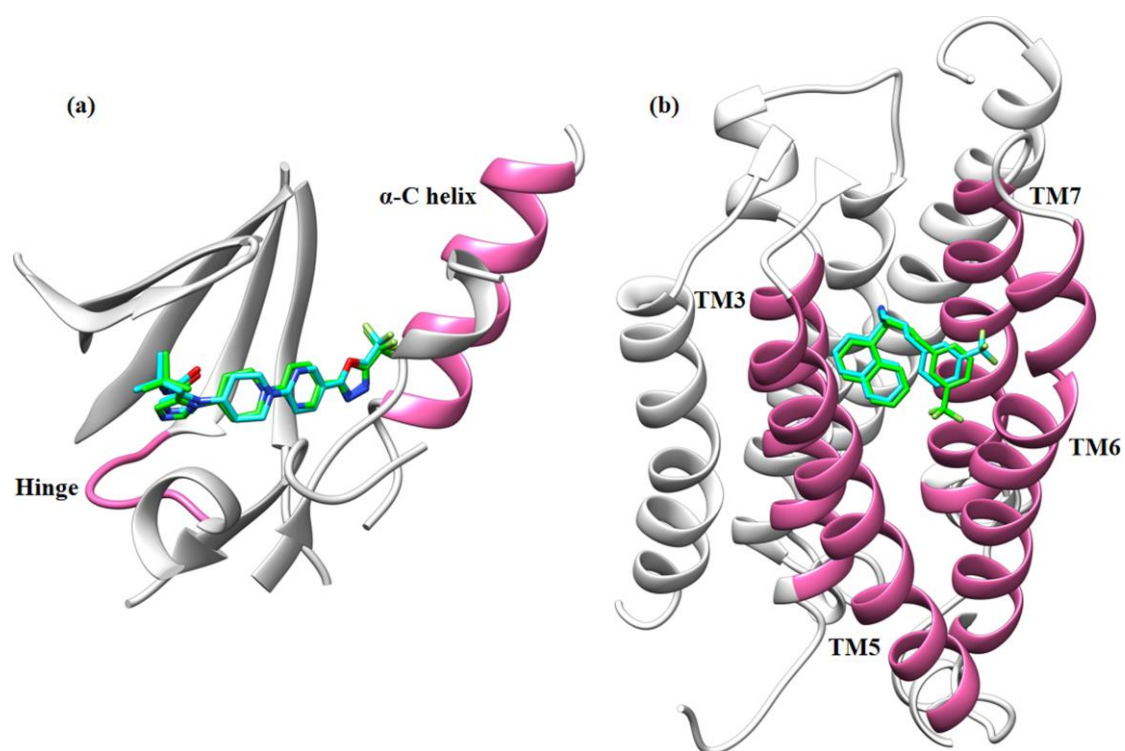

**Figure S1.** The binding mode of co-crystallized (green) and re-docked (cyan) WNK463 and cinacalcet in the WNK1 kinase domain and CaSR, respectively.

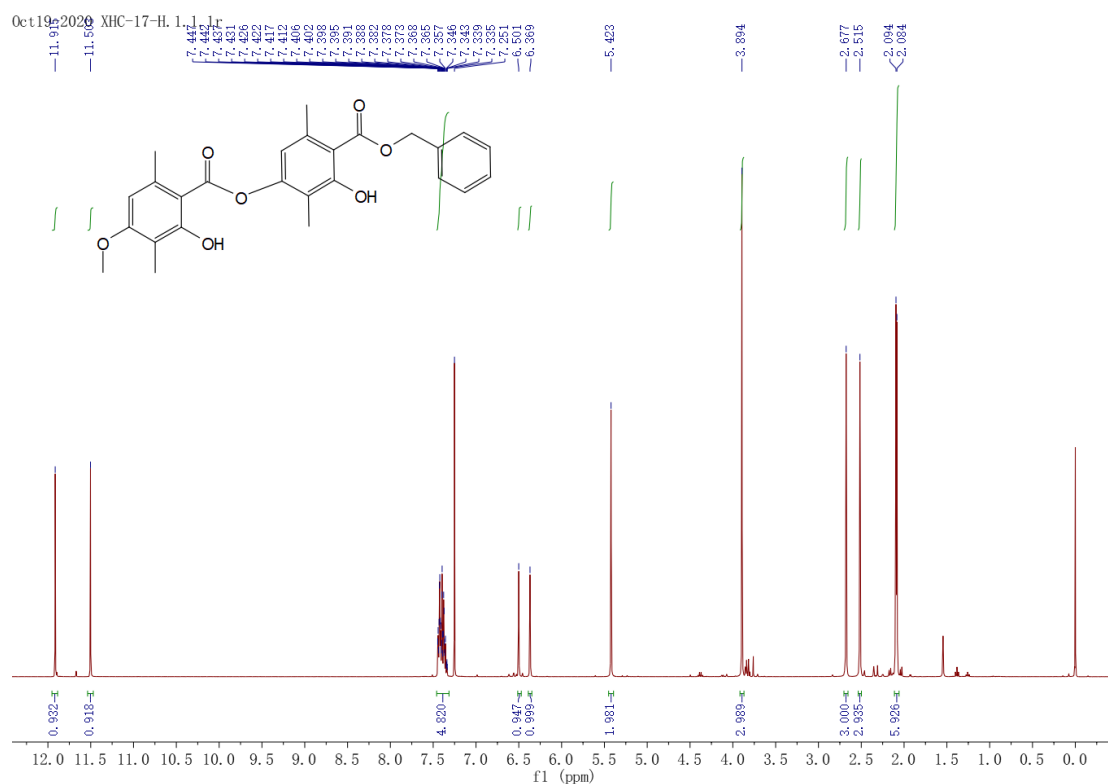

**Figure S2.** <sup>1</sup>H NMR spectrum of compound 6a

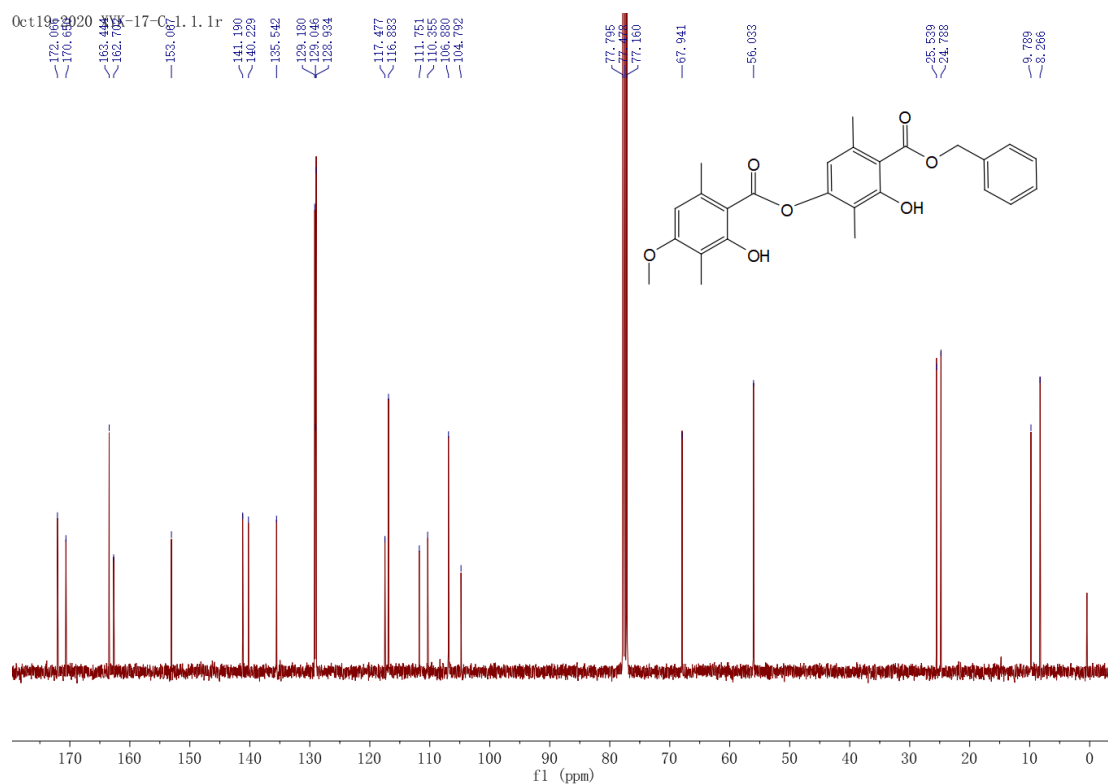

**Figure S3.** <sup>13</sup>C NMR spectrum of compound 6a

Item name: 7a-XYK-17  
Item description:

Channel name: 1: Average Time 0.1334 min : TOF MS (50-1500) ESI+ : Centroided : Combined

5.77e6

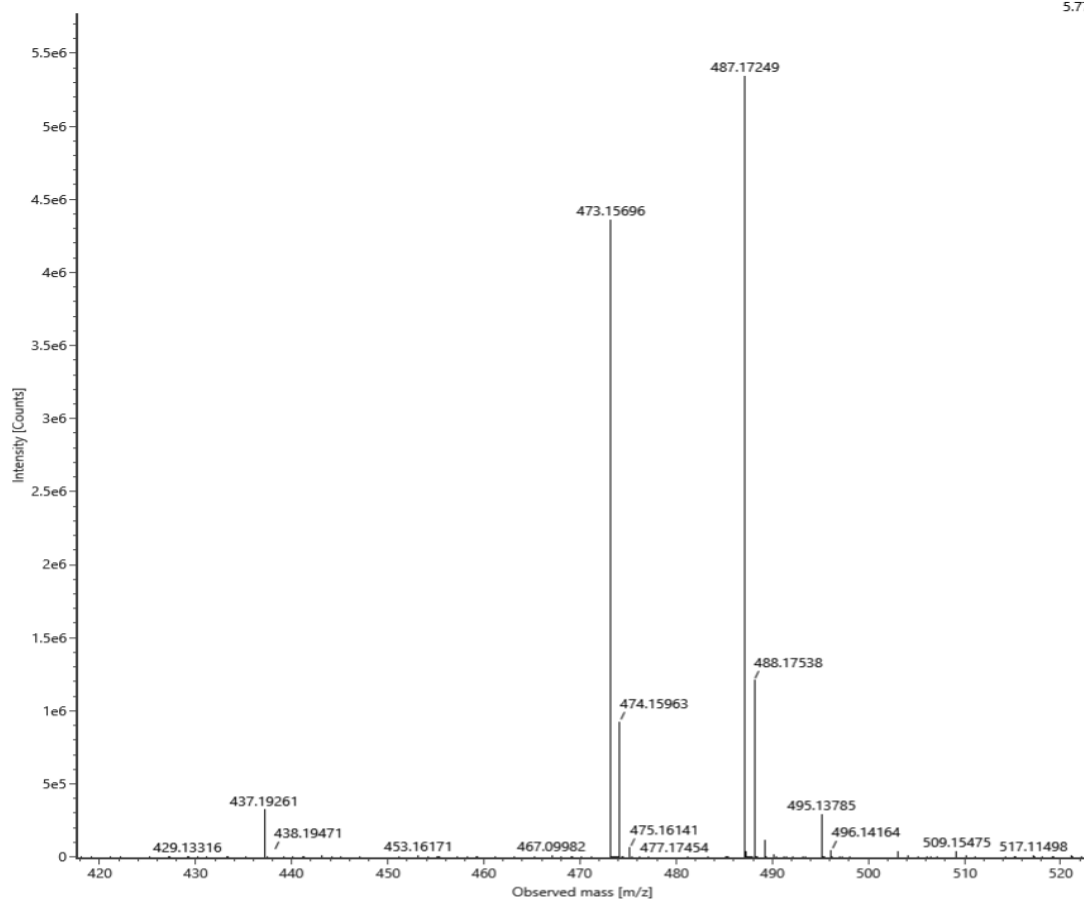

**Figure S4.** HRMS spectrum of compound **6a**

Jul101-2020-XYK-H. 1. 1. 1r

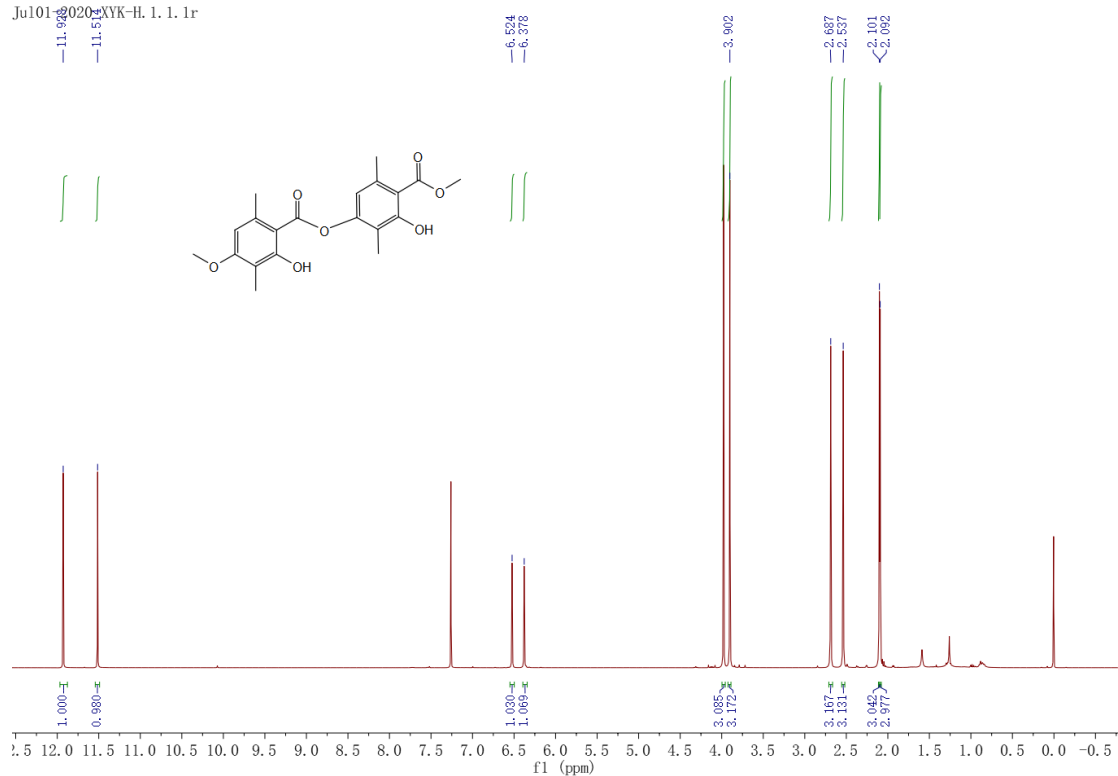

**Figure S5.**  $^1\text{H}$  NMR spectrum of compound **6b**

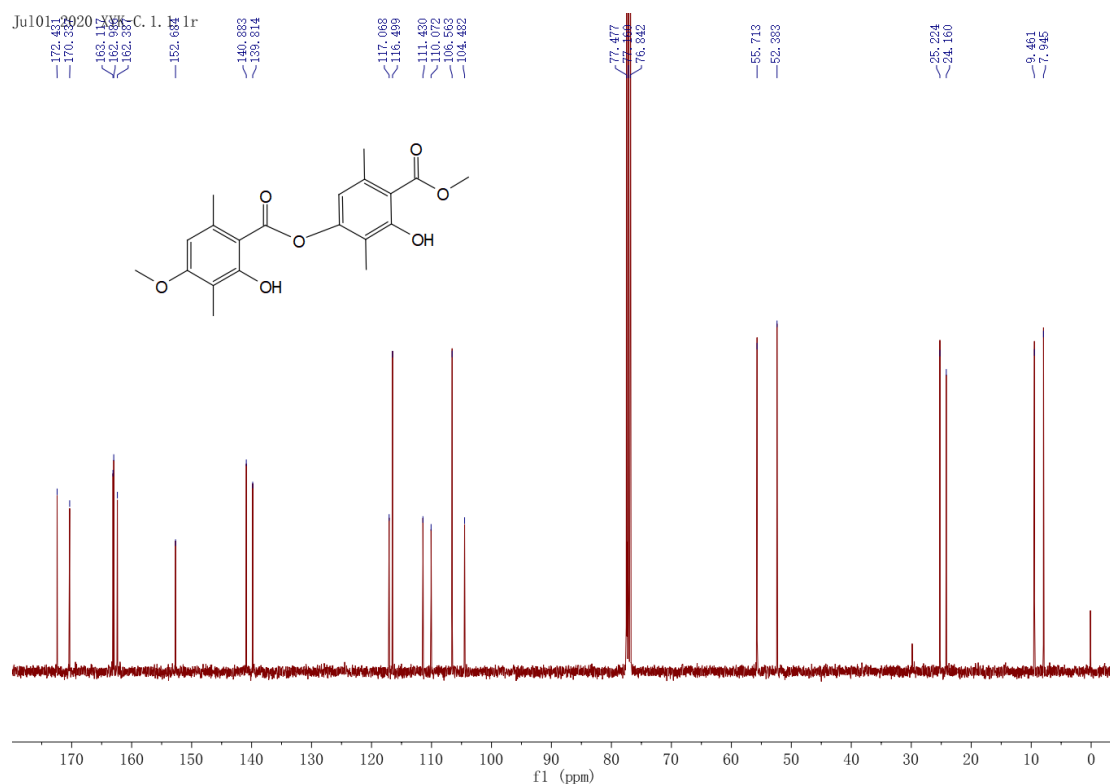

**Figure S6.**  $^{13}\text{C}$  NMR spectrum of compound **6b**

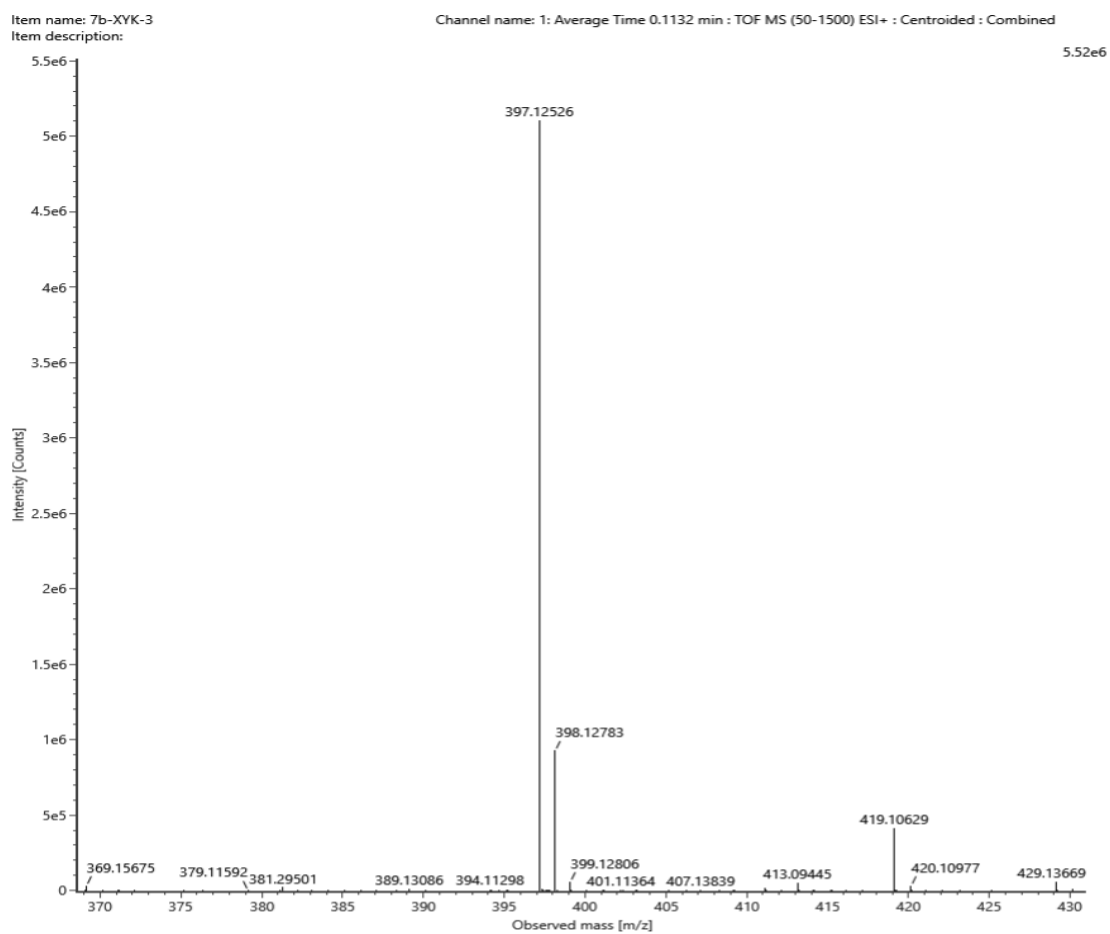

**Figure S7.** HRMS spectrum of compound **6b**

May10-2021, XWK-49, 1. 1. 1r

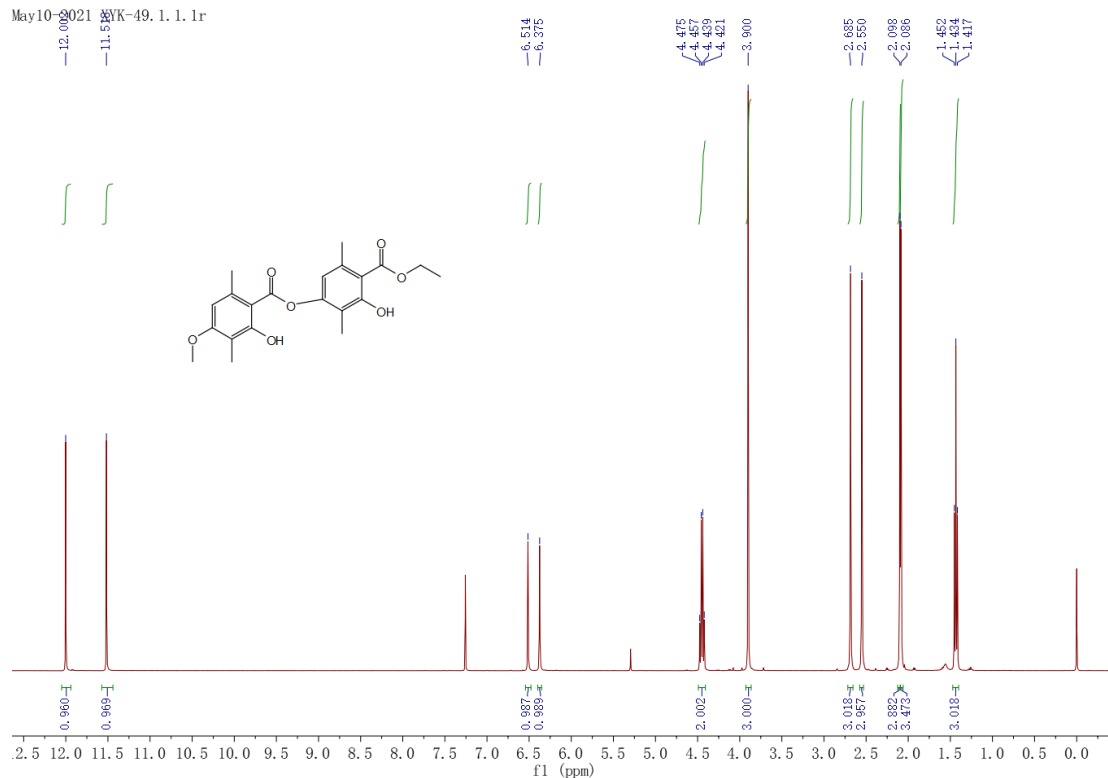

**Figure S8.** <sup>1</sup>H NMR spectrum of compound **6c**

May10-2021, XWK-49-C, 1. 1r

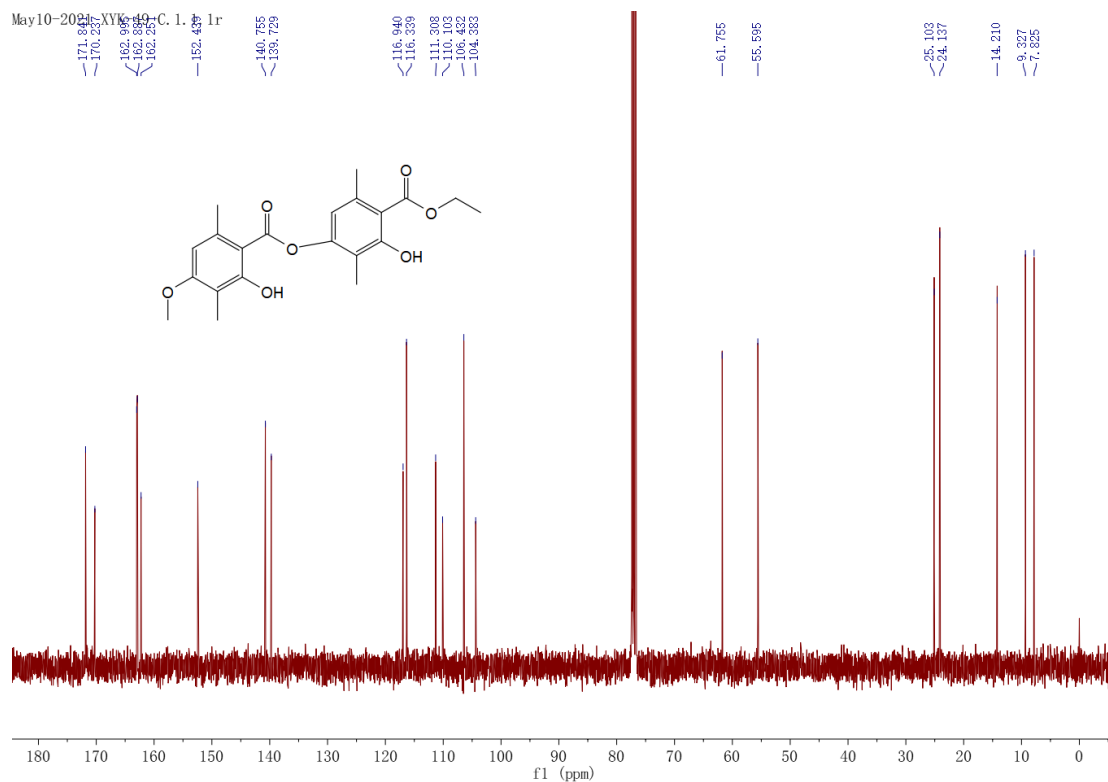

**Figure S9.** <sup>13</sup>C NMR spectrum of compound **6c**

Item name: 7c-XYK-49  
Item description:

Channel name: 1: Average Time 0.0788 min : TOF MS (50-1500) ESI+ : Centroided : Combined

5.91e6

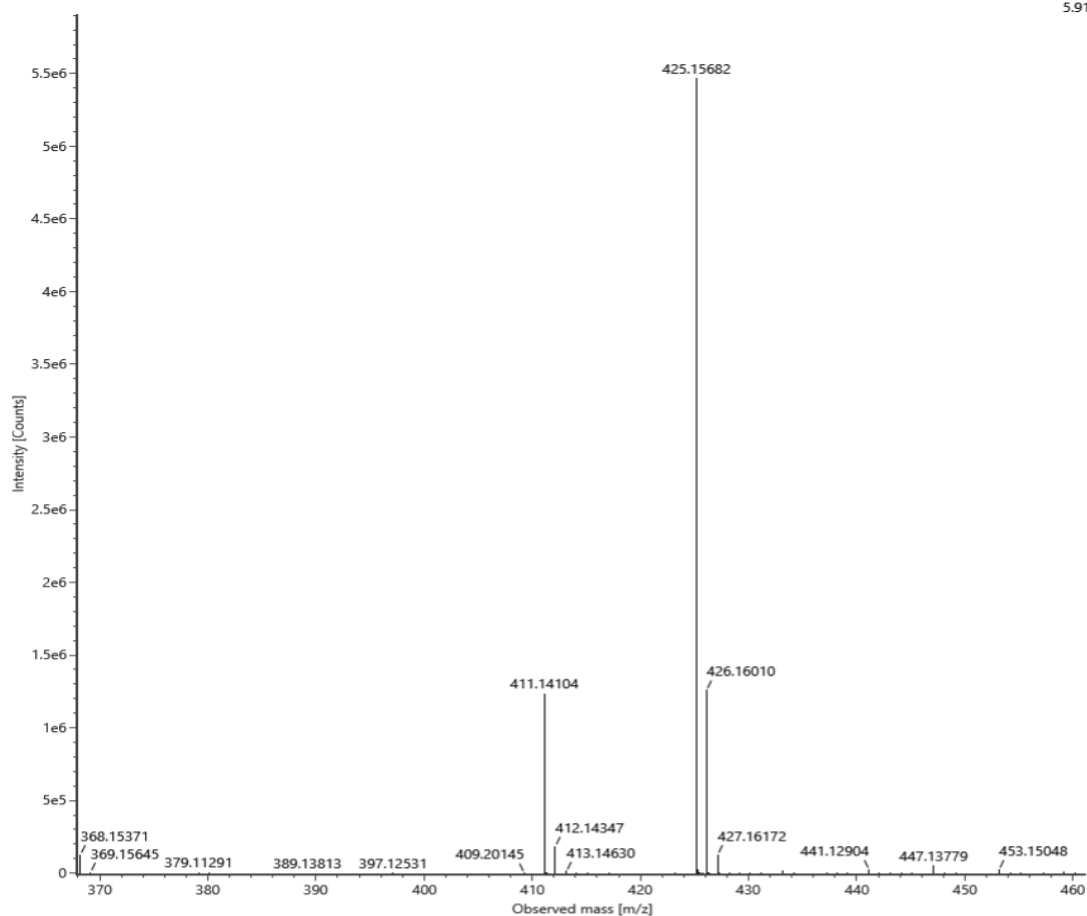

Figure S10. HRMS spectrum of compound 6c

May 14, 2023 XYK-90, 1. 1. 1r

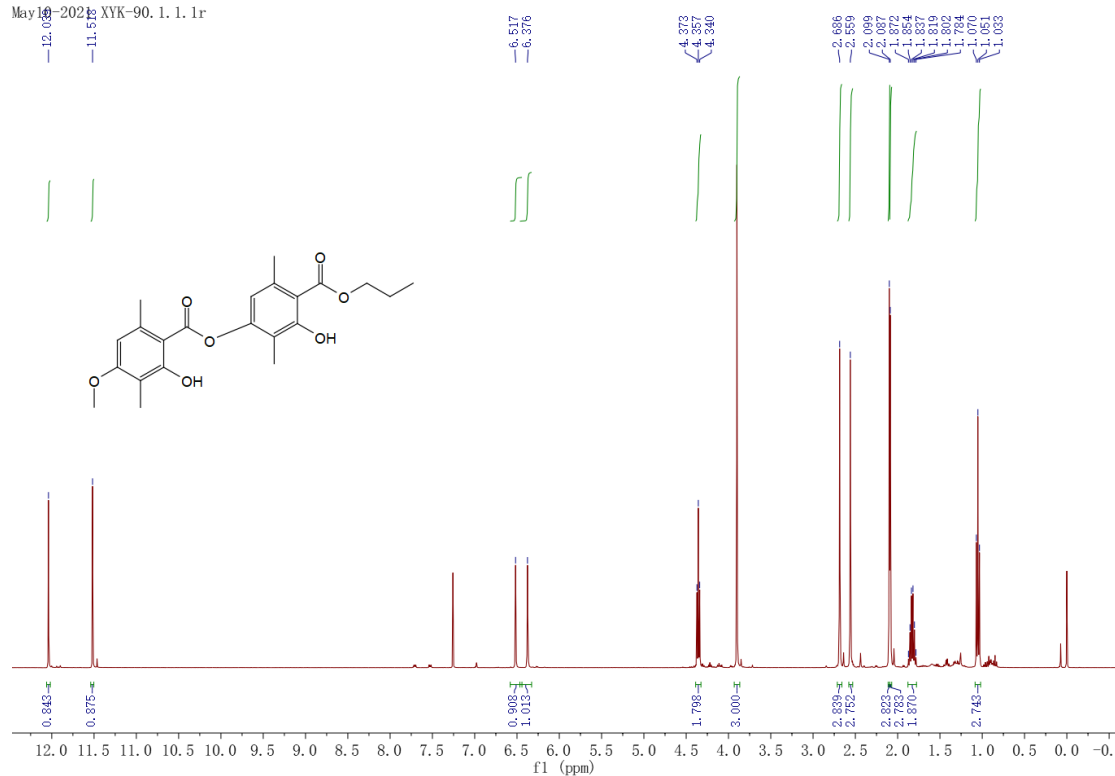

Figure S11. <sup>1</sup>H NMR spectrum of compound 6d

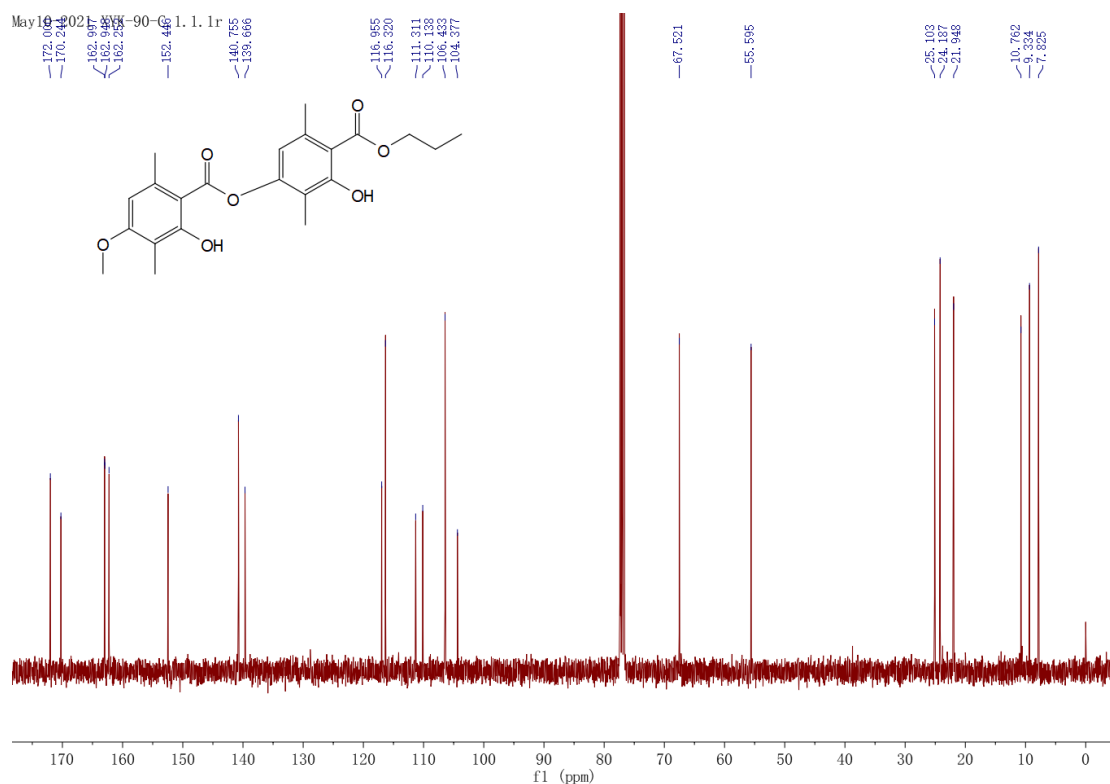

**Figure S12.**  $^{13}\text{C}$  NMR spectrum of compound **6d**

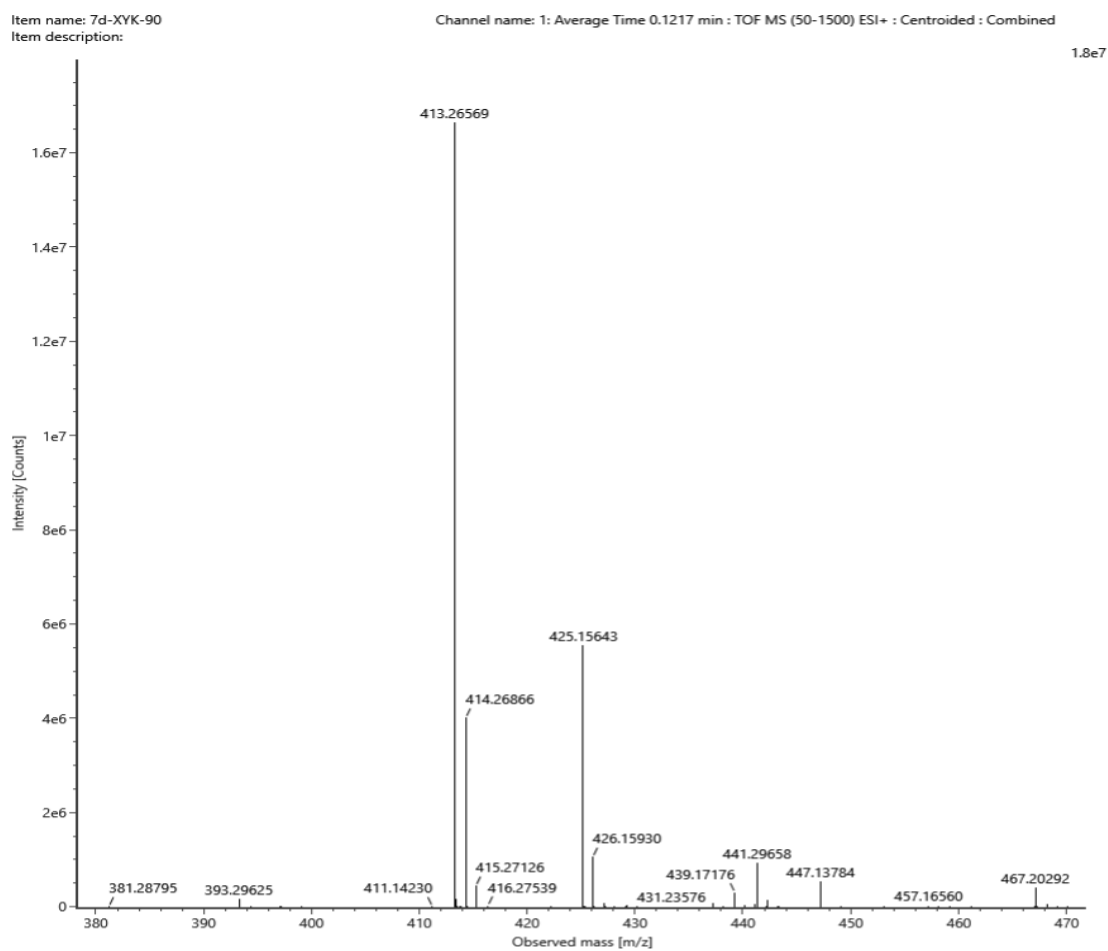

**Figure S13.** HRMS spectrum of compound **6d**

Jun28-2021 NK-107, 1. 1. 1r

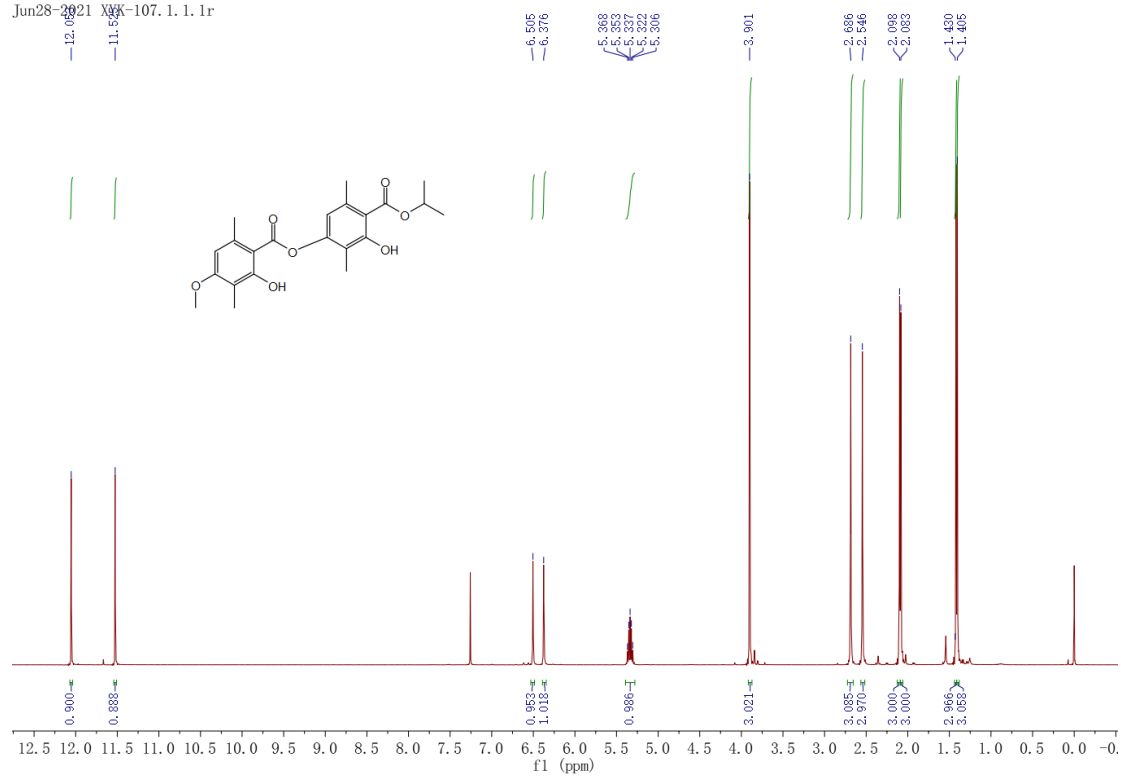

Figure S14. <sup>1</sup>H NMR spectrum of compound **6e**

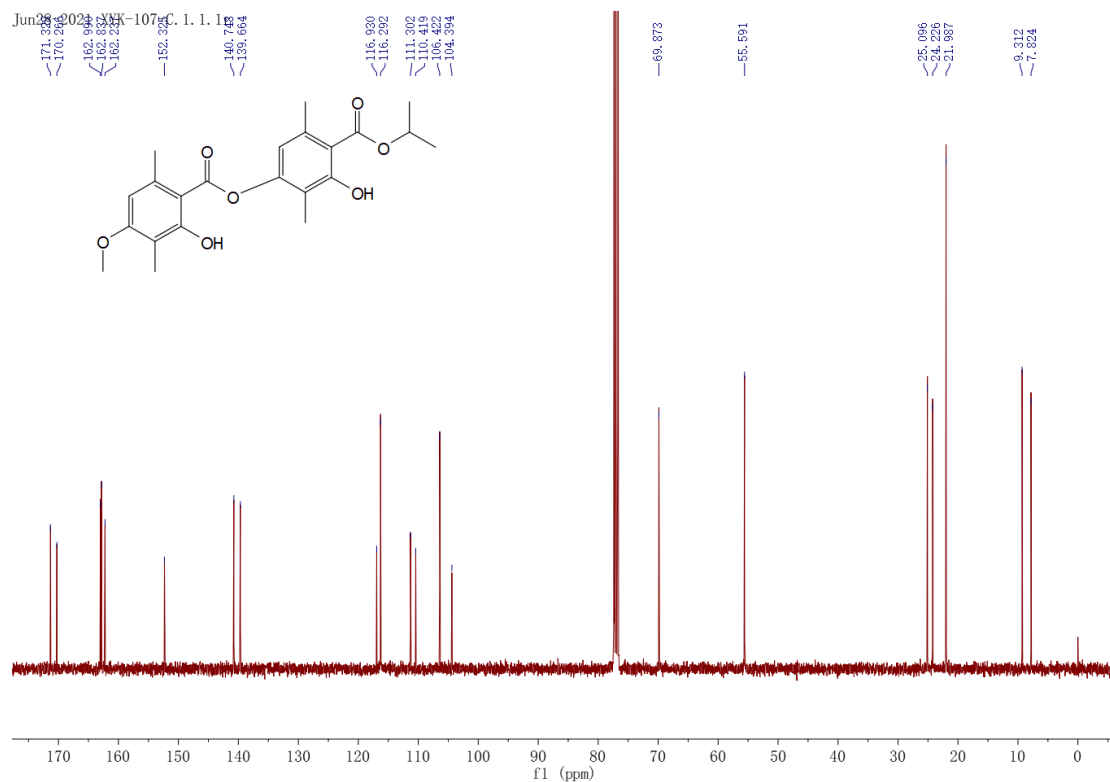

Figure S15. <sup>13</sup>C NMR spectrum of compound **6e**

Item name: 7e-XYK-107  
Item description:

Channel name: 1: Average Time 0.1217 min : TOF MS (50-1500) ESI+ : Centroided : Combined

1.74e7

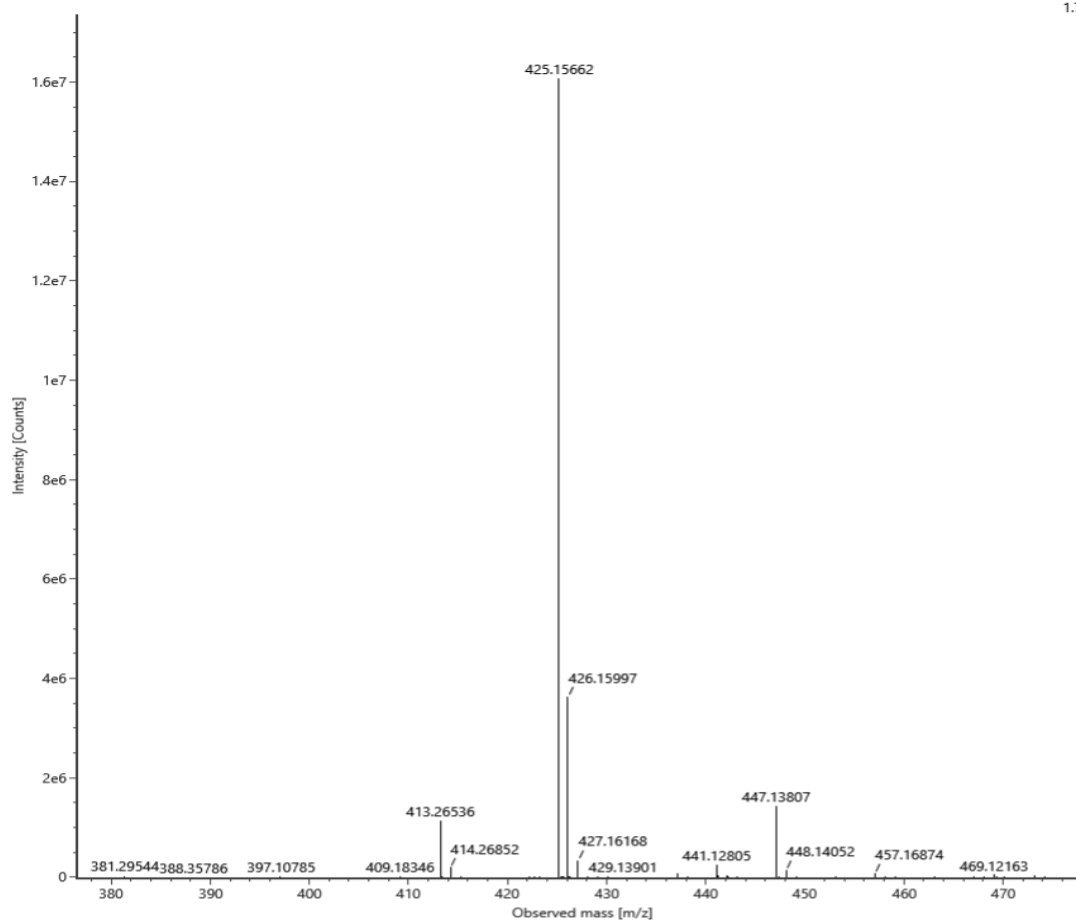

Figure S16. HRMS spectrum of compound 6e

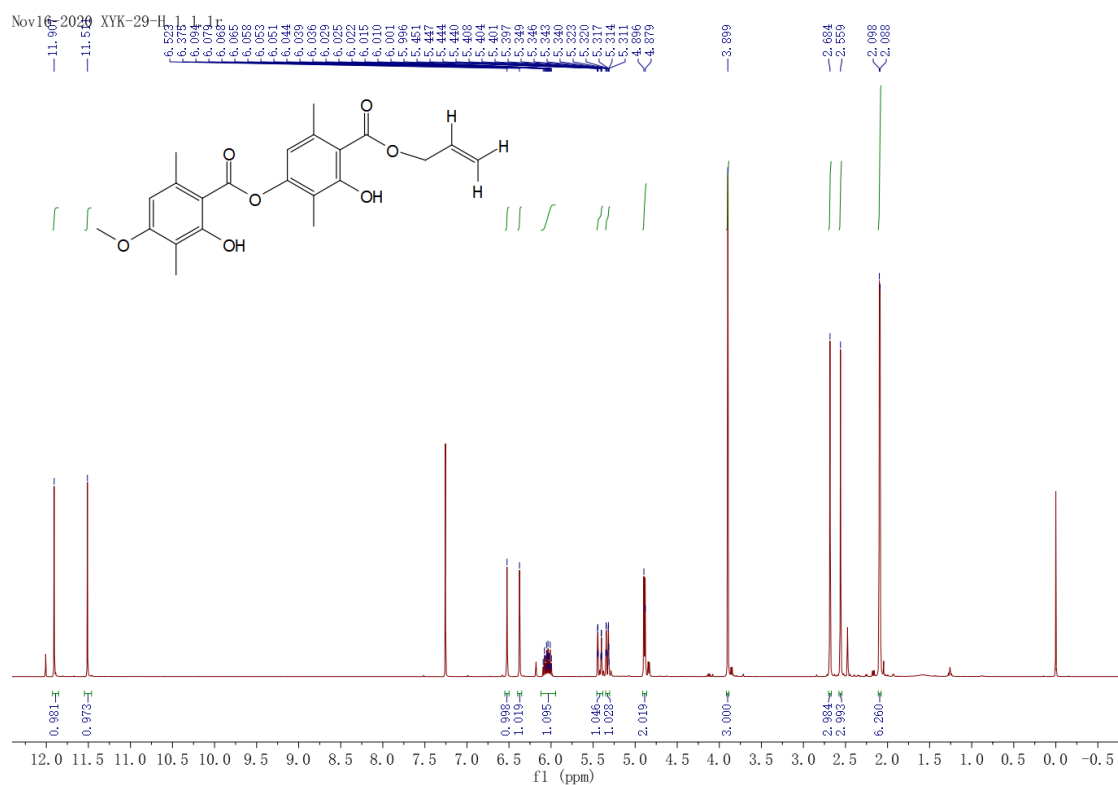

Figure S17. <sup>1</sup>H NMR spectrum of compound 6f

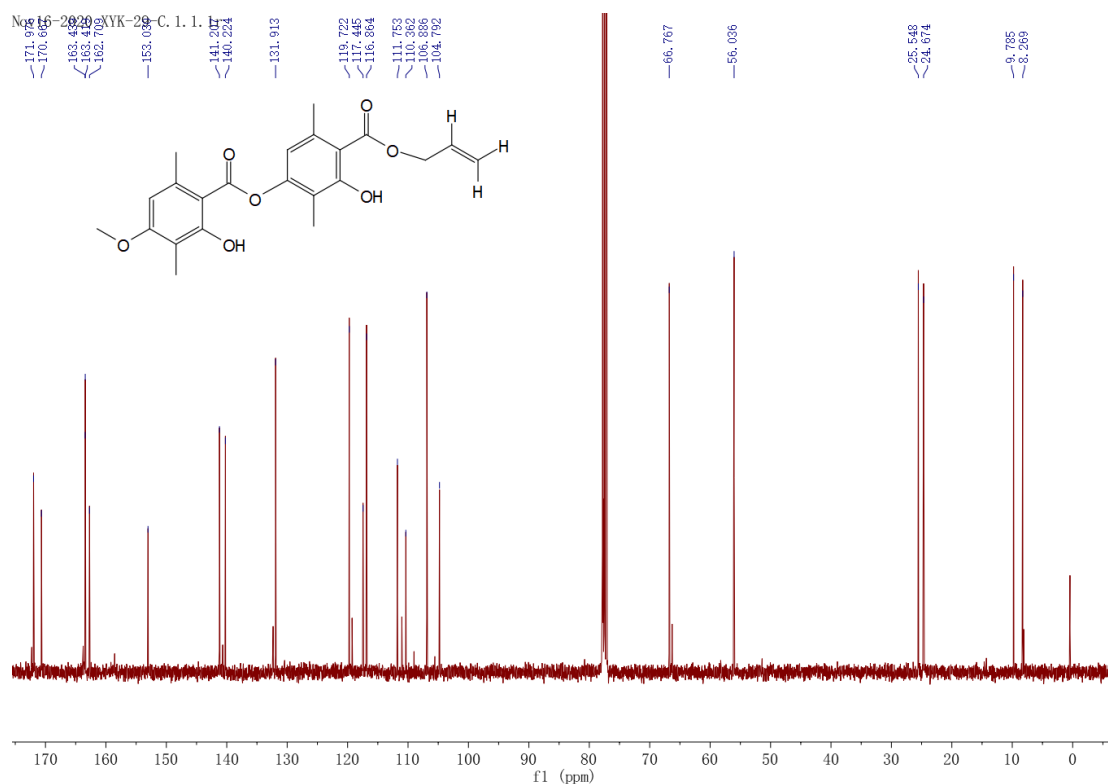

**Figure S18.**  $^{13}\text{C}$  NMR spectrum of compound **6f**

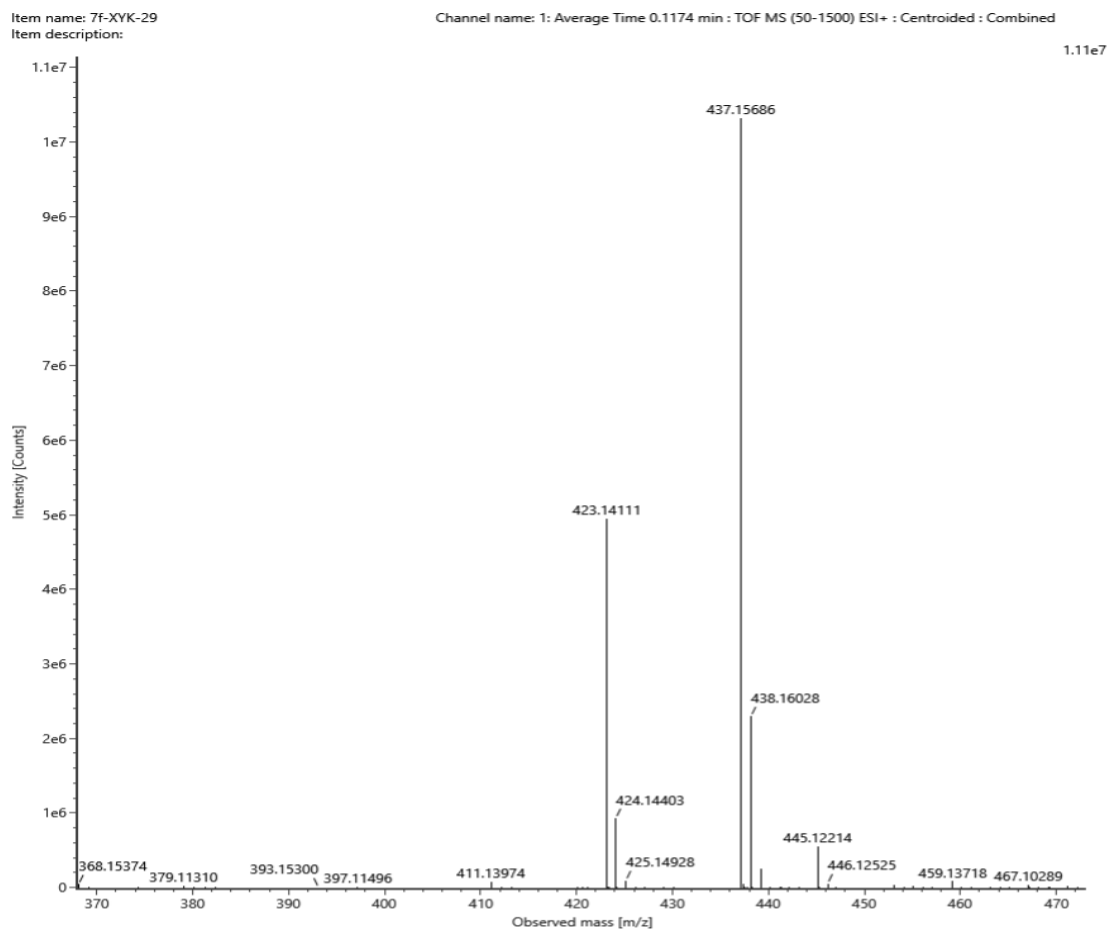

**Figure S19.** HRMS spectrum of compound **6f**

Jan06-2021 XYK-50-H. 1. 1. 1r

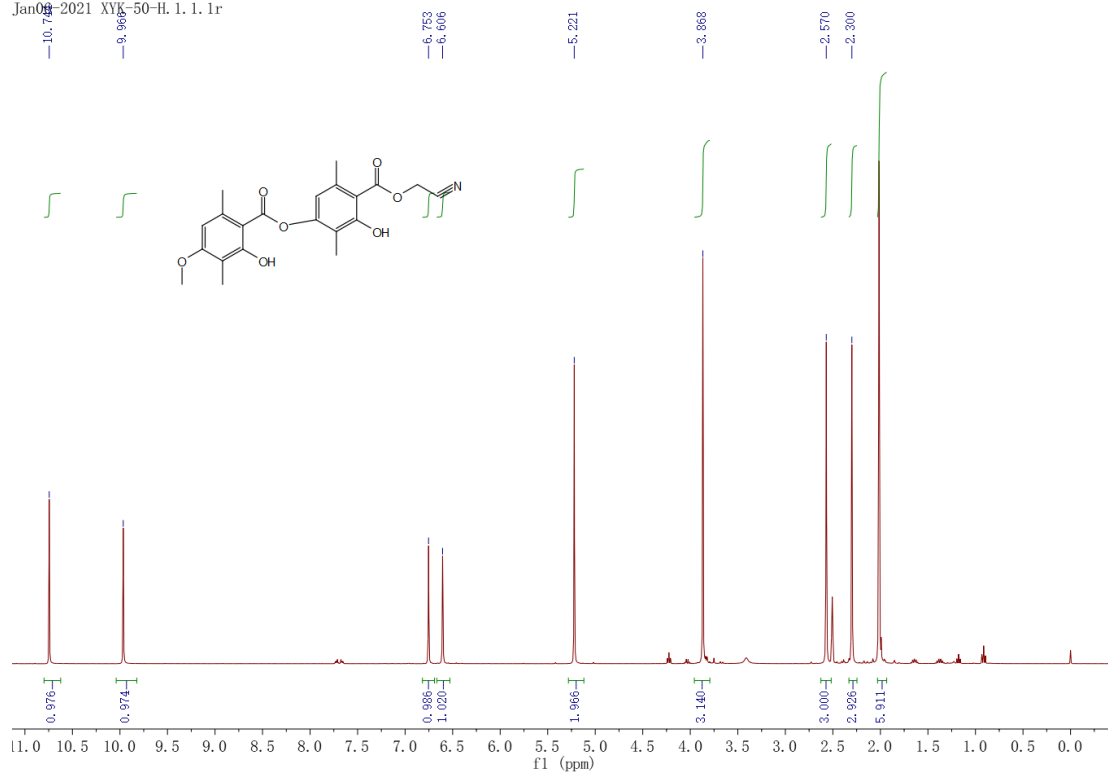

Figure S20.  $^1\text{H}$  NMR spectrum of compound **6g**

Jan06-2021 XYK-50-H. 1. 1. 1r

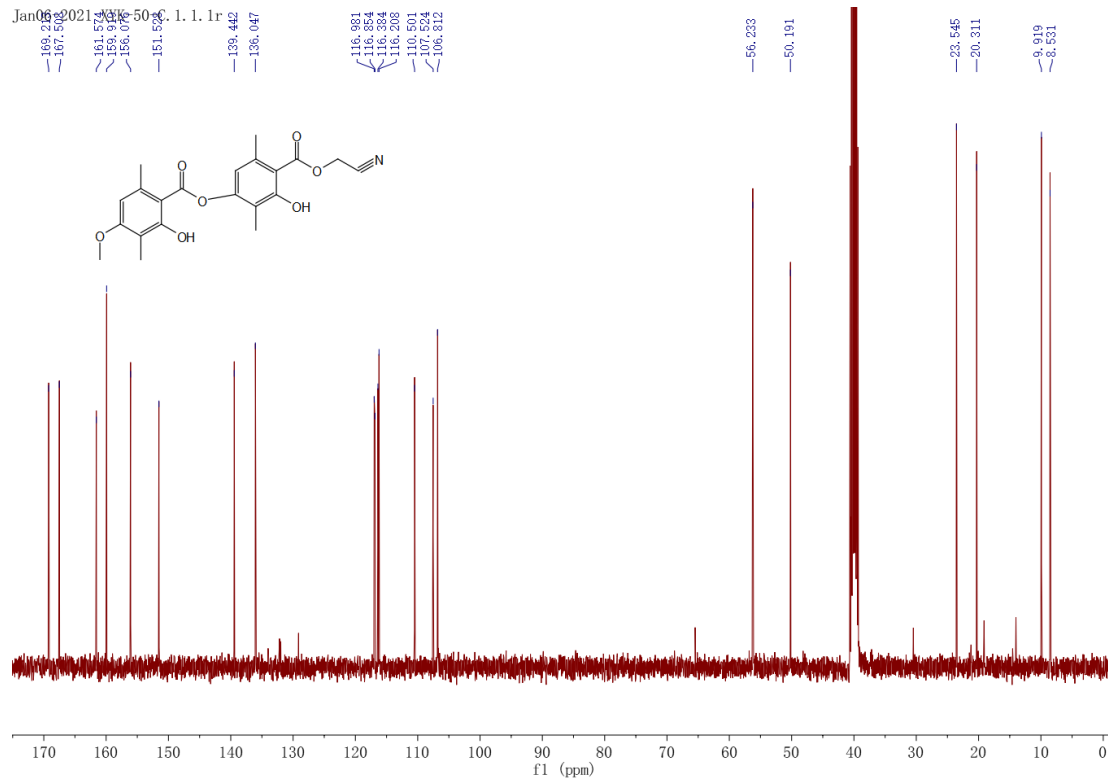

Figure S21.  $^{13}\text{C}$  NMR spectrum of compound **6g**

Item name: 7g-XYK-50  
Item description:

Channel name: 1: Average Time 0.1334 min : TOF MS (50-1500) ESI+ : Centroided : Combined

1.68e6

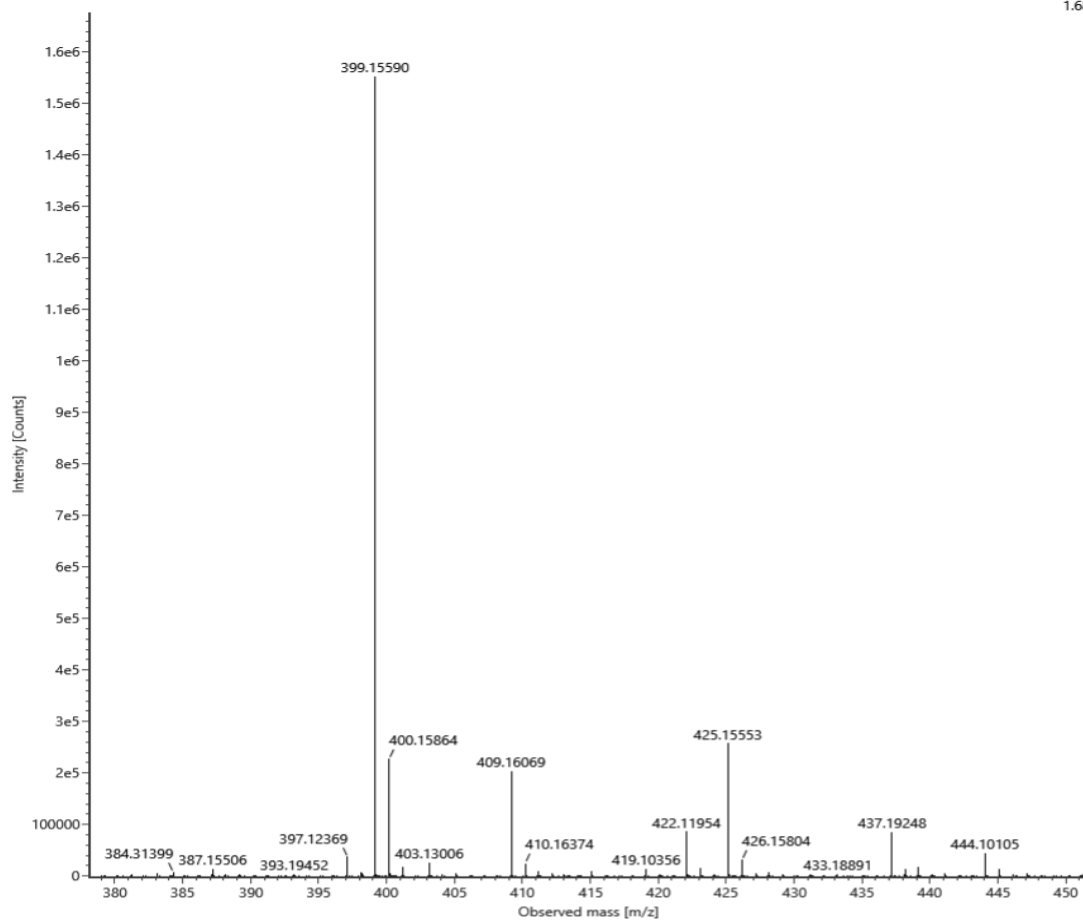

Figure S22. HRMS spectrum of compound 6g

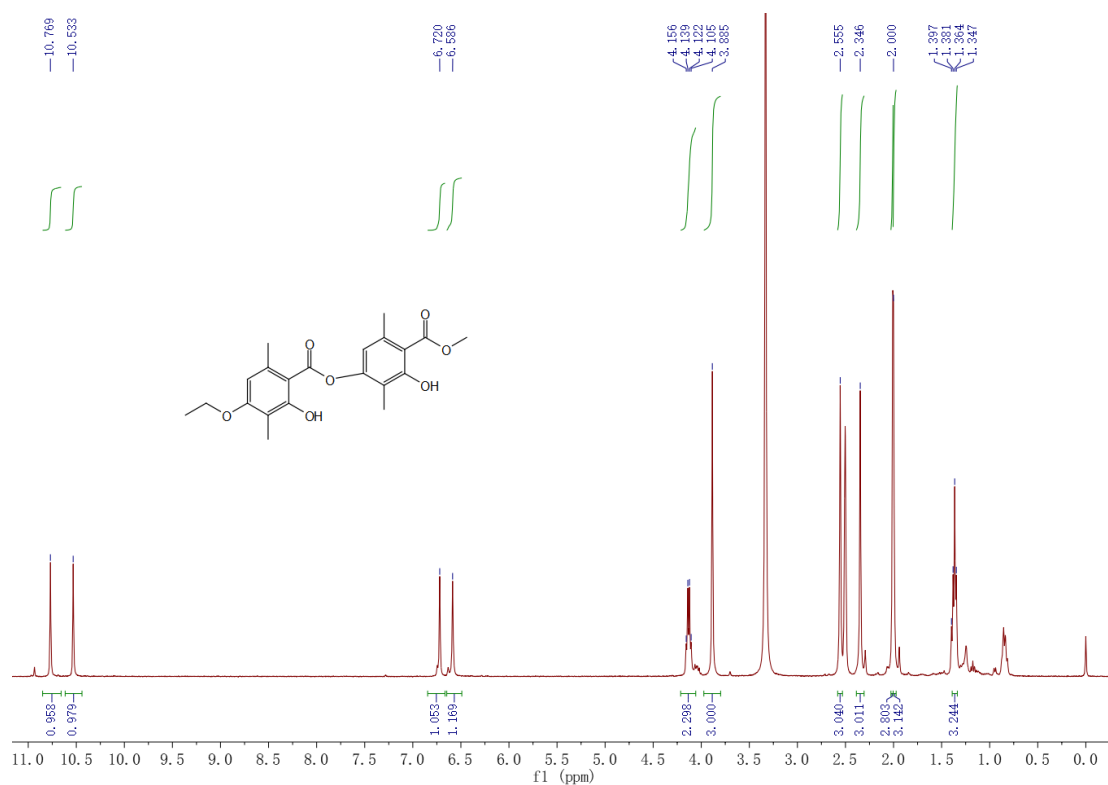

Figure S23. <sup>1</sup>H NMR spectrum of compound 6h

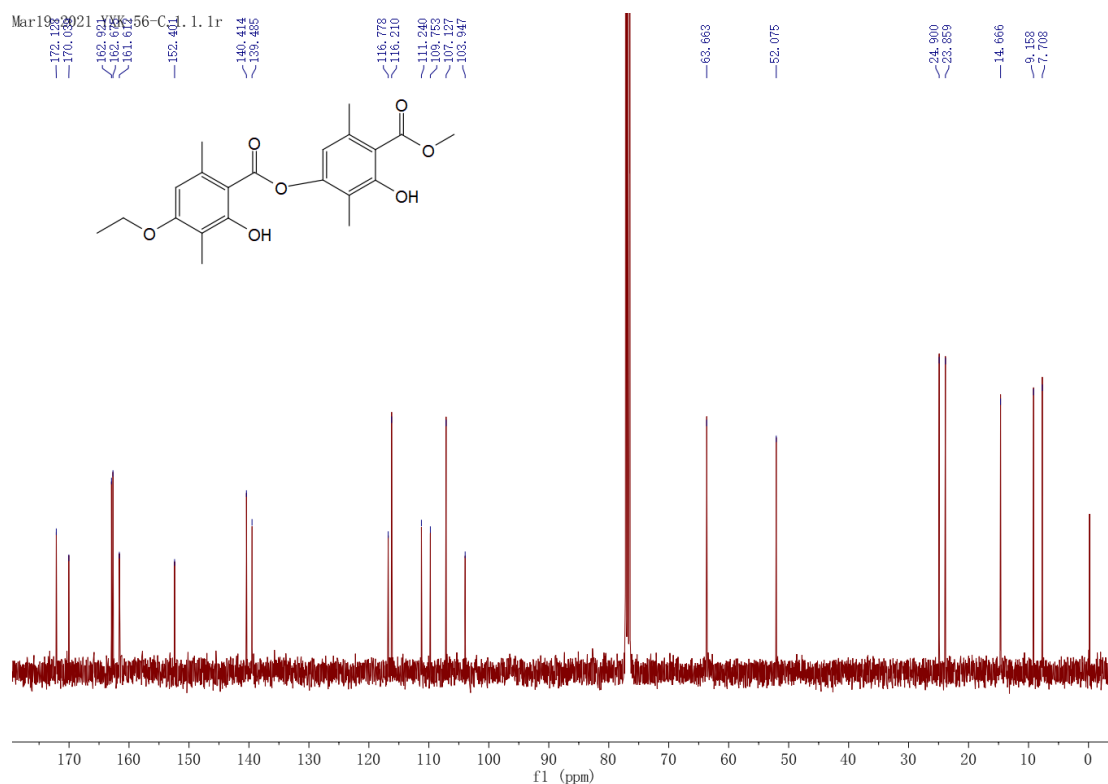

**Figure S24.**  $^{13}\text{C}$  NMR spectrum of compound **6h**

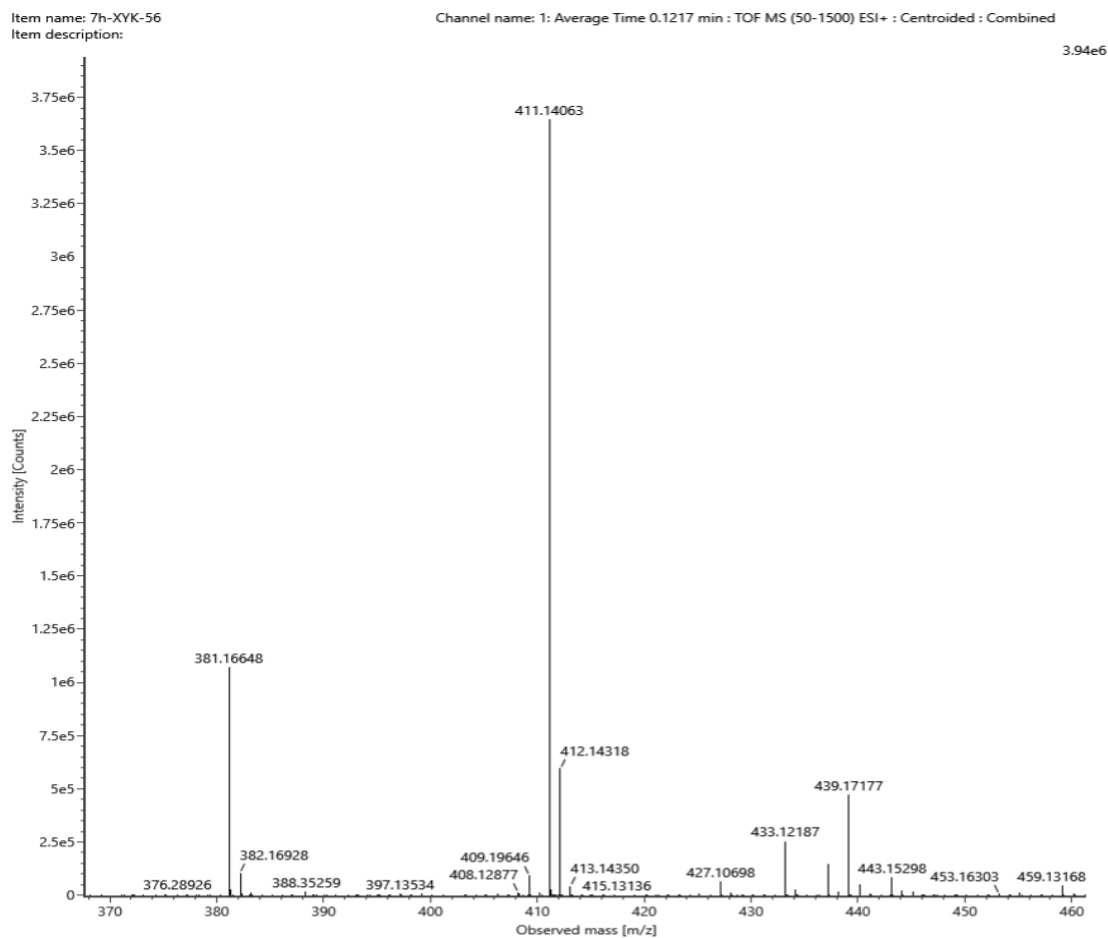

**Figure S25.** HRMS spectrum of compound **6h**

Jun 03-2021 XYK-77, 1. 1. 1r

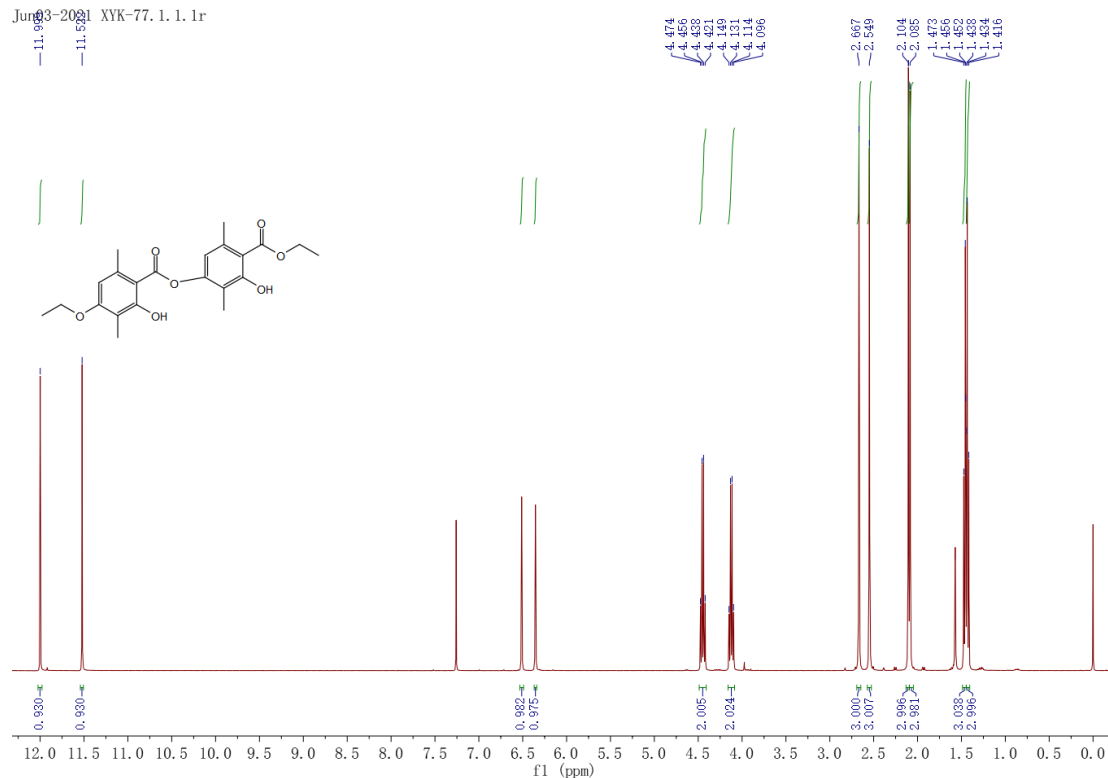

**Figure S26.** <sup>1</sup>H NMR spectrum of compound **6i**

Jun 03-2021 XYK-77, 1. 1. 1r

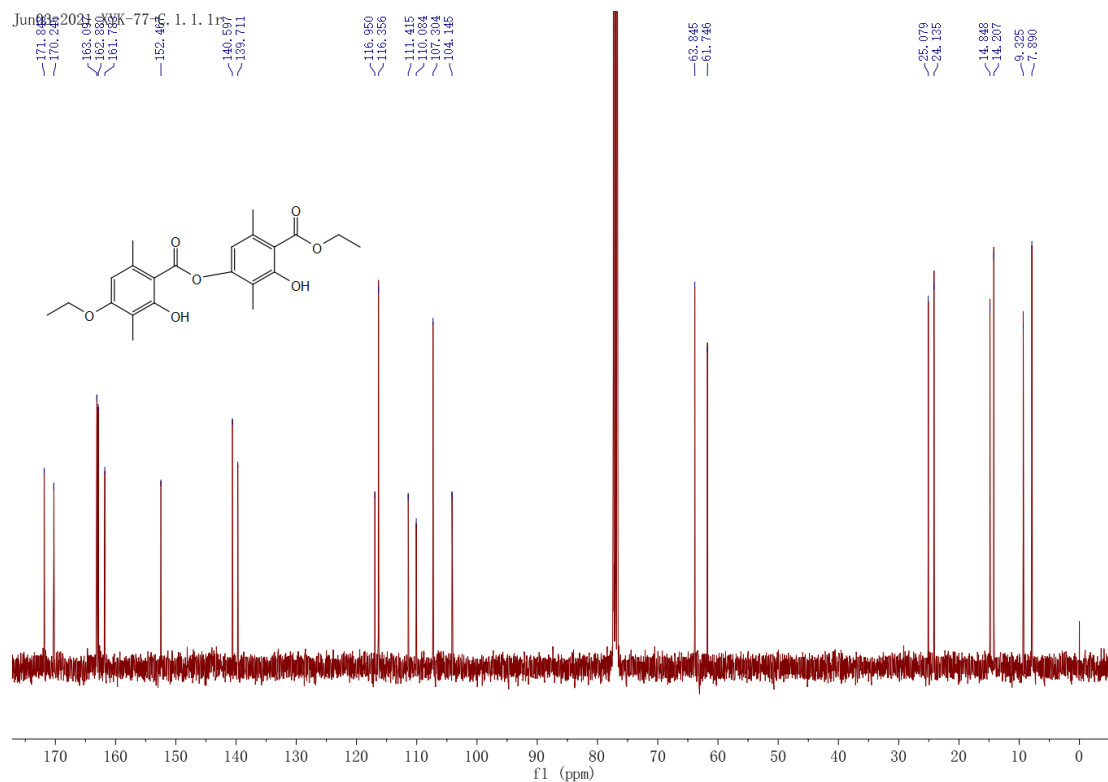

**Figure S27.** <sup>13</sup>C NMR spectrum of compound **6i**

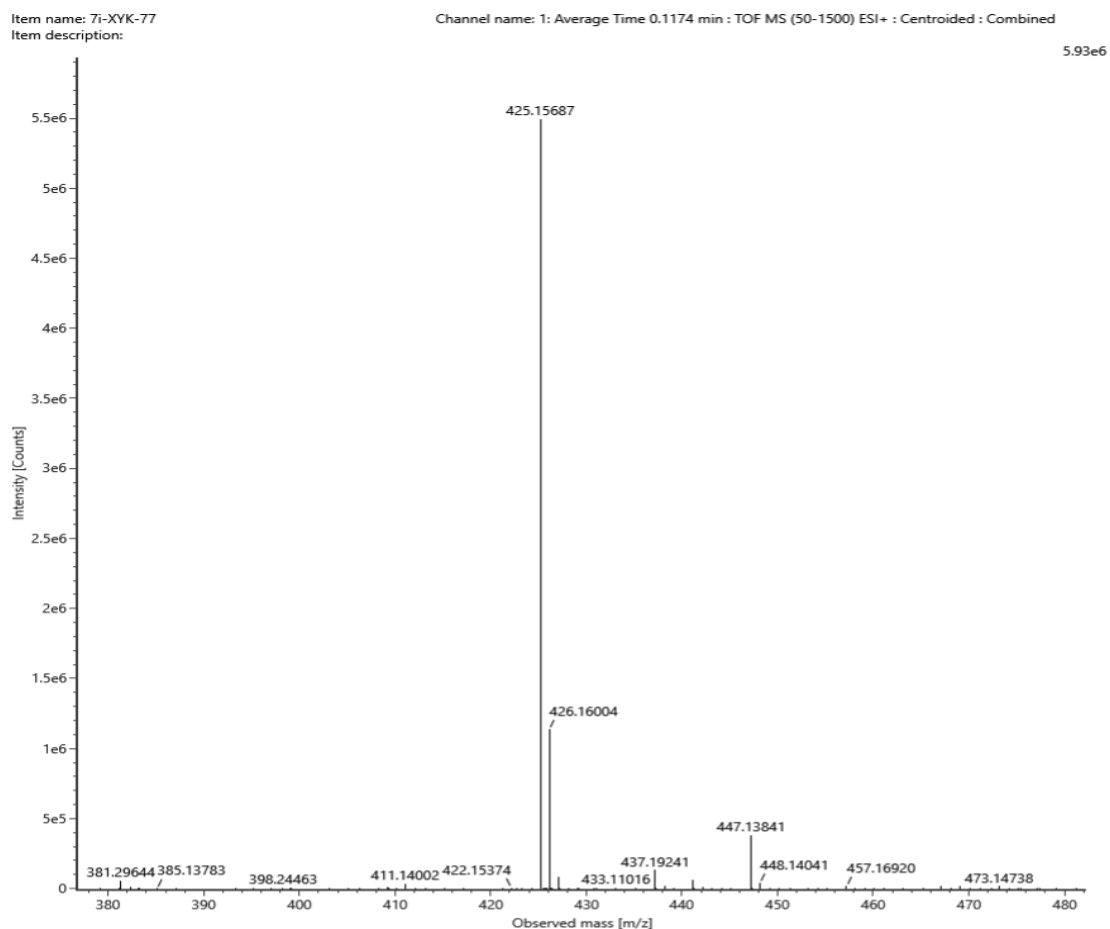

**Figure S28.** HRMS spectrum of compound **6i**

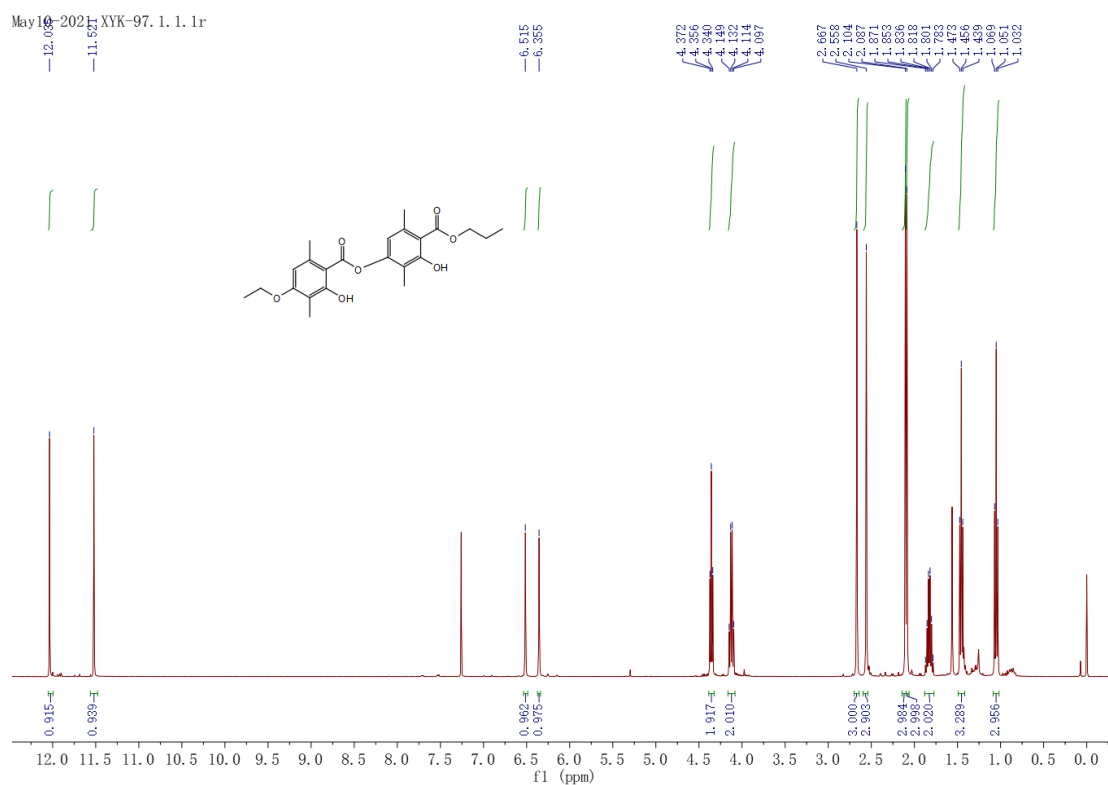

**Figure S29.**  $^1\text{H}$  NMR spectrum of compound **6j**

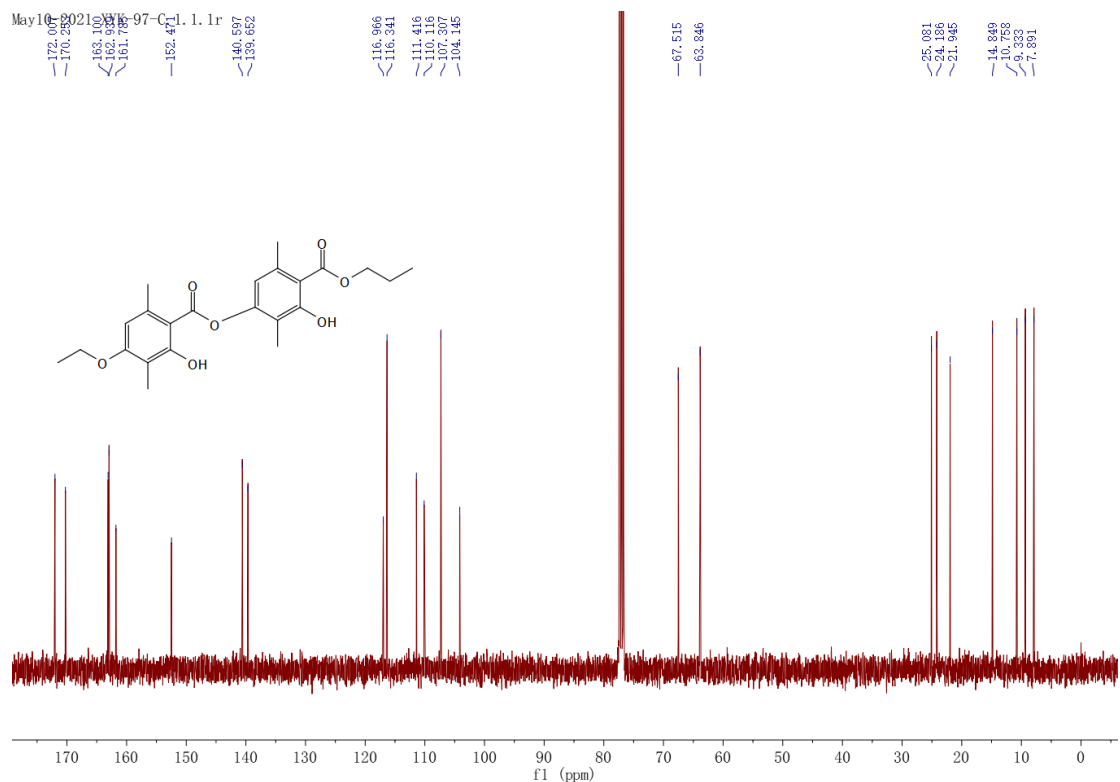

**Figure S30.**  $^{13}\text{C}$  NMR spectrum of compound **6j**

Item name: Tj-XYK-97  
Item description:

Channel name: 1: Average Time 0.1132 min : TOF MS (50-1500) ESI+ : Centroided : Combined

6.81e6

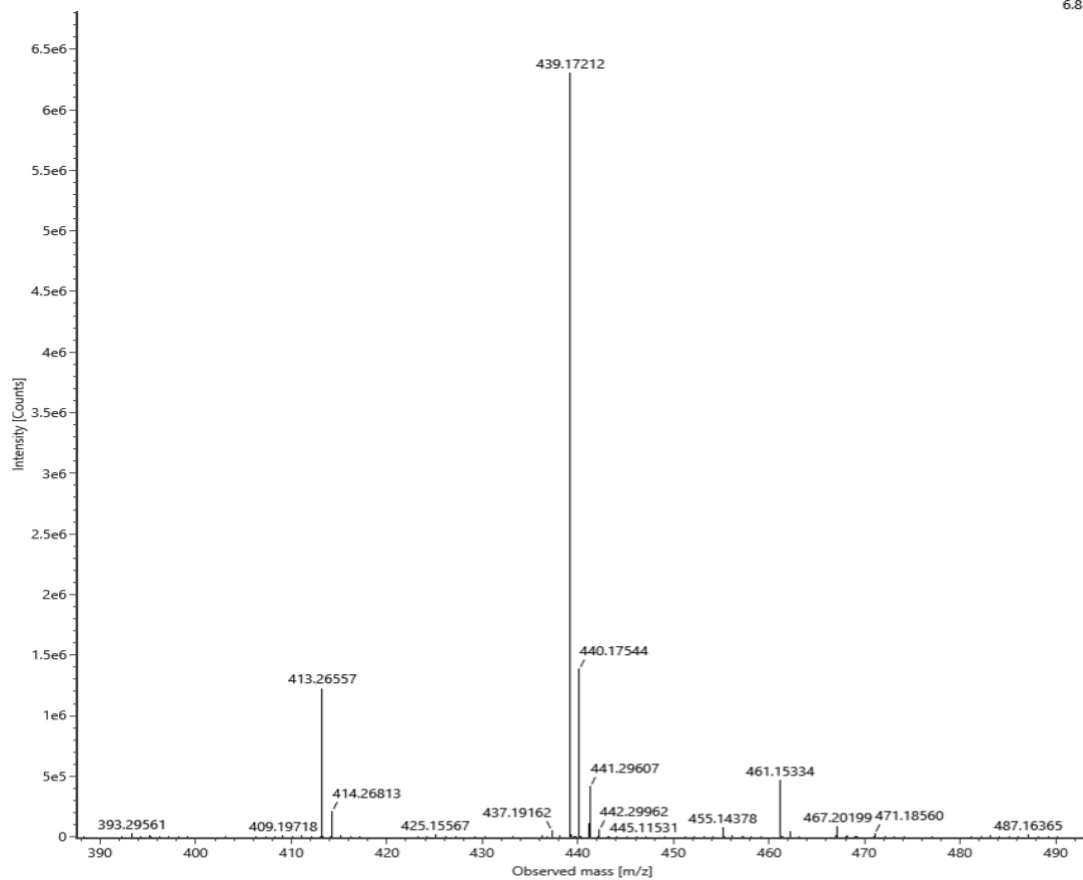

**Figure S31.** HRMS spectrum of compound **6j**

Jun28-2021 8VK-108. 1. 1. 1r

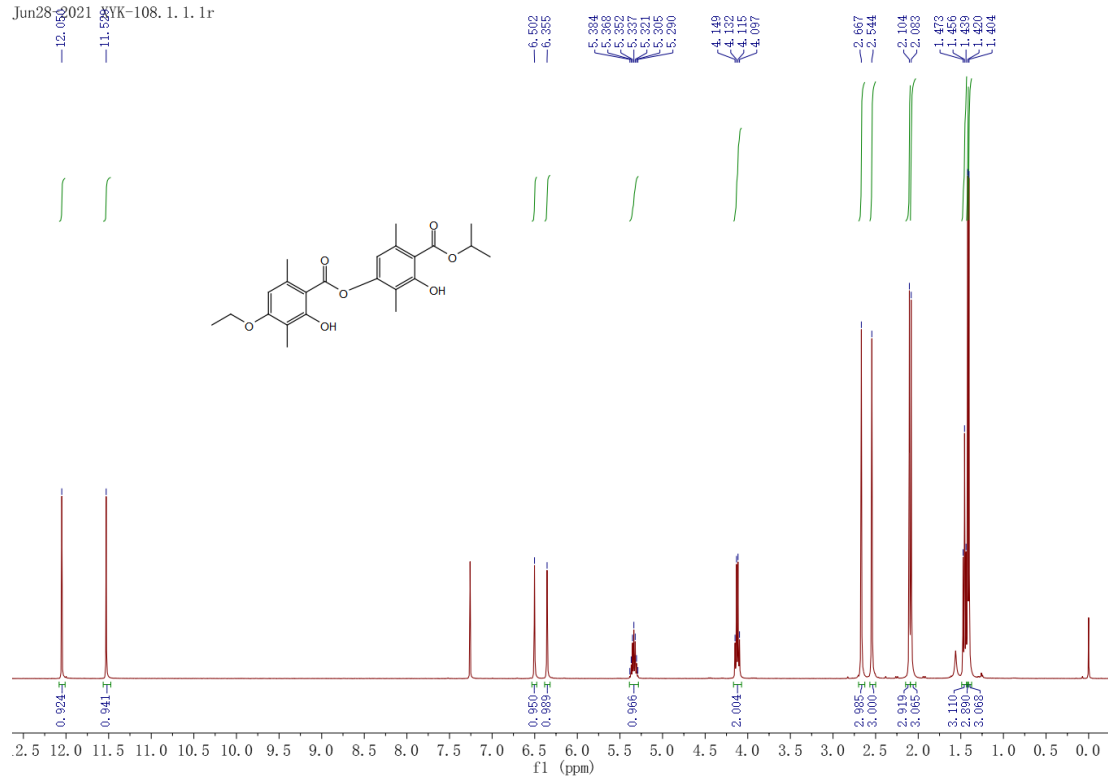

Figure S32. <sup>1</sup>H NMR spectrum of compound 6k

Jun28-2021 8VK-108. 1. 1. 1r

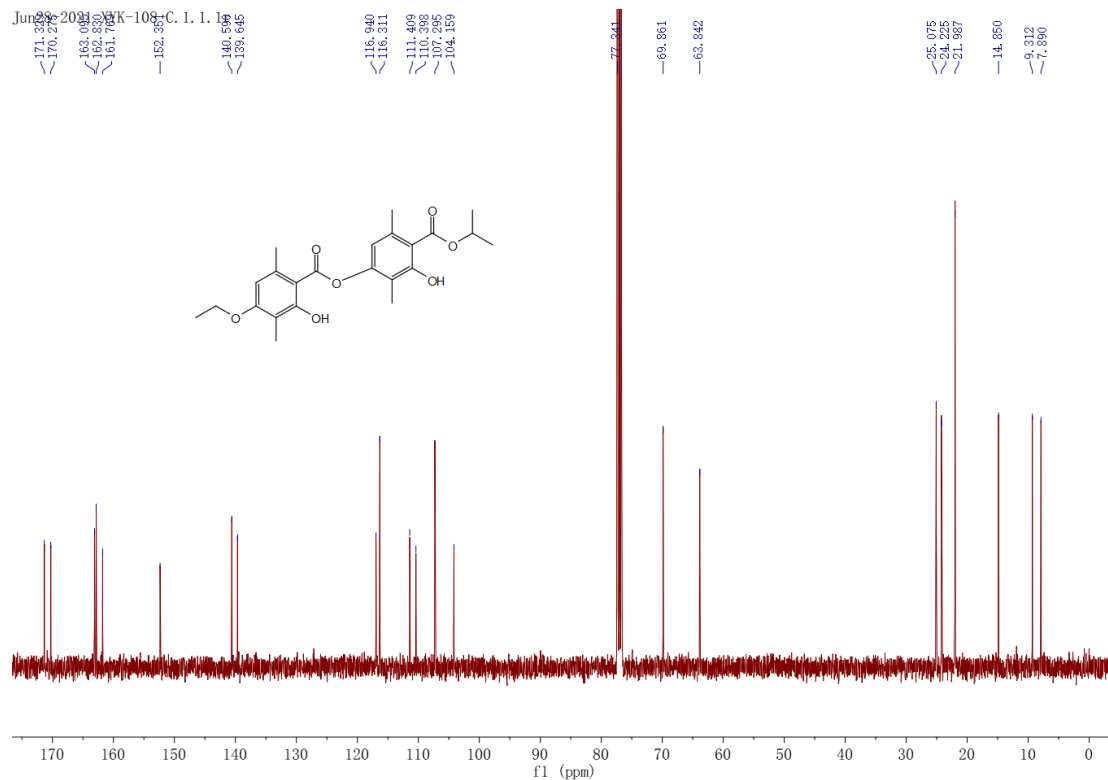

Figure S33. <sup>13</sup>C NMR spectrum of compound 6k

Item name: 7k-XYK-108  
Item description:

Channel name: 1: Average Time 0.1131 min : TOF MS (50-1500) ESI+ : Centroided : Combined

1.44e7

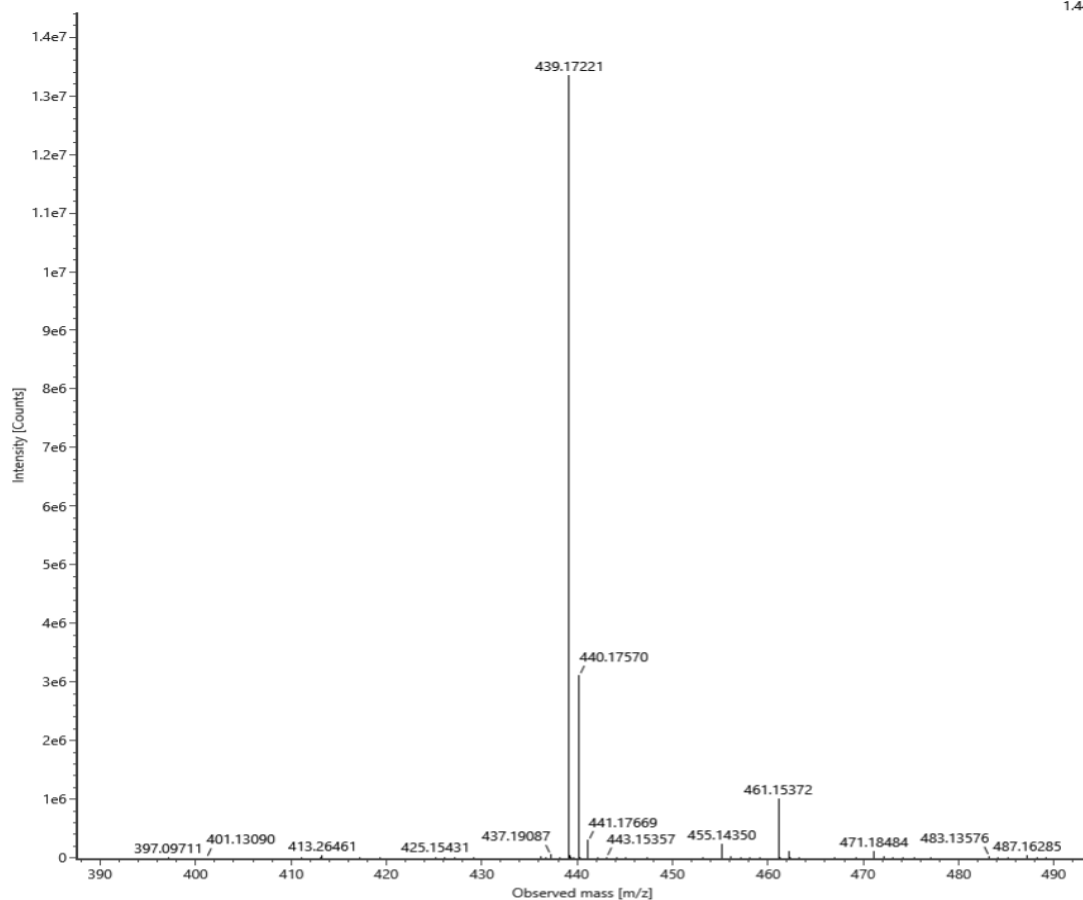

Figure S34. HRMS spectrum of compound 6k

Jan 18, 2021 XYK-57-H, 1. 1. 1r

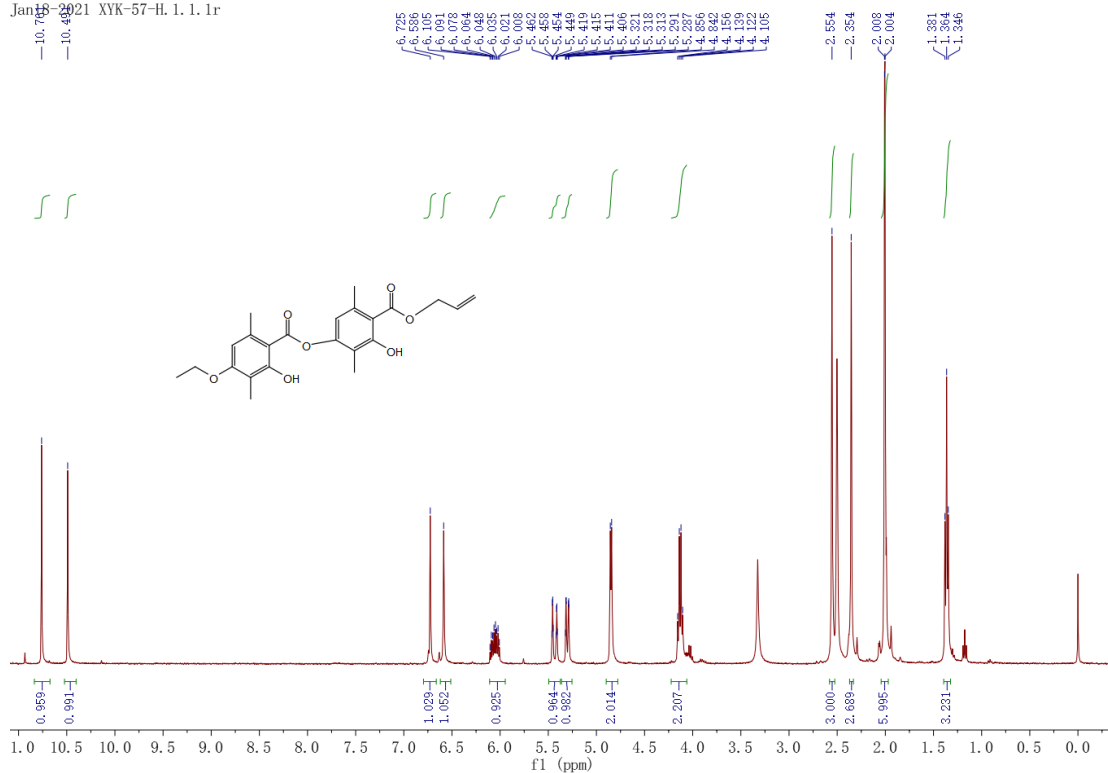

Figure S35. <sup>1</sup>H NMR spectrum of compound 6l

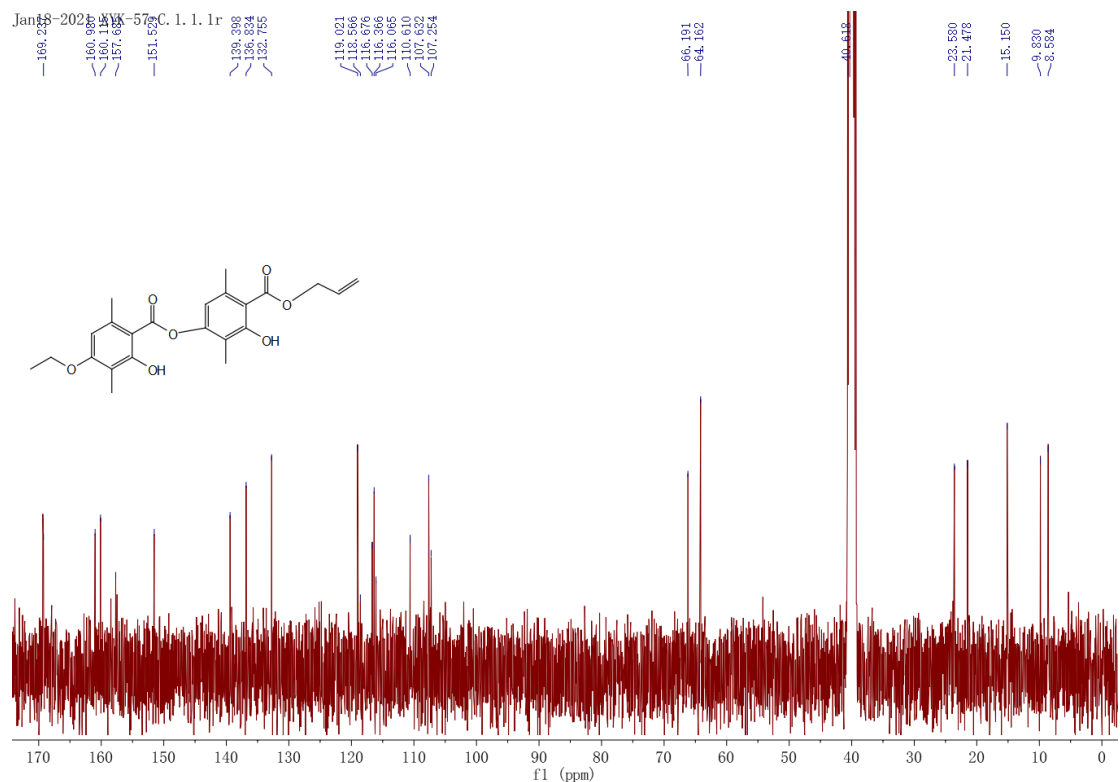

**Figure S36.**  $^{13}\text{C}$  NMR spectrum of compound **6l**

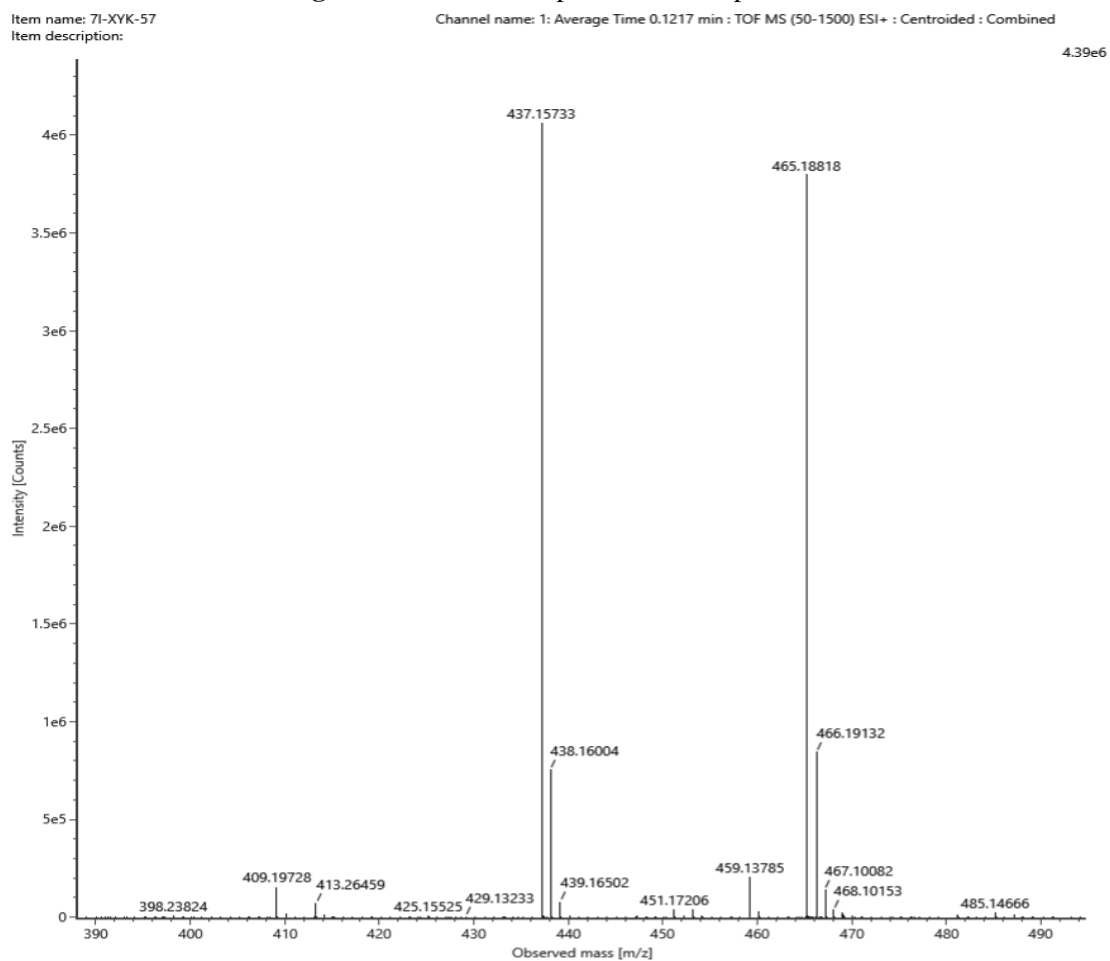

**Figure S37.** HRMS spectrum of compound **6l**

Apr07-2021 XYK-72. 1. 1. 1r

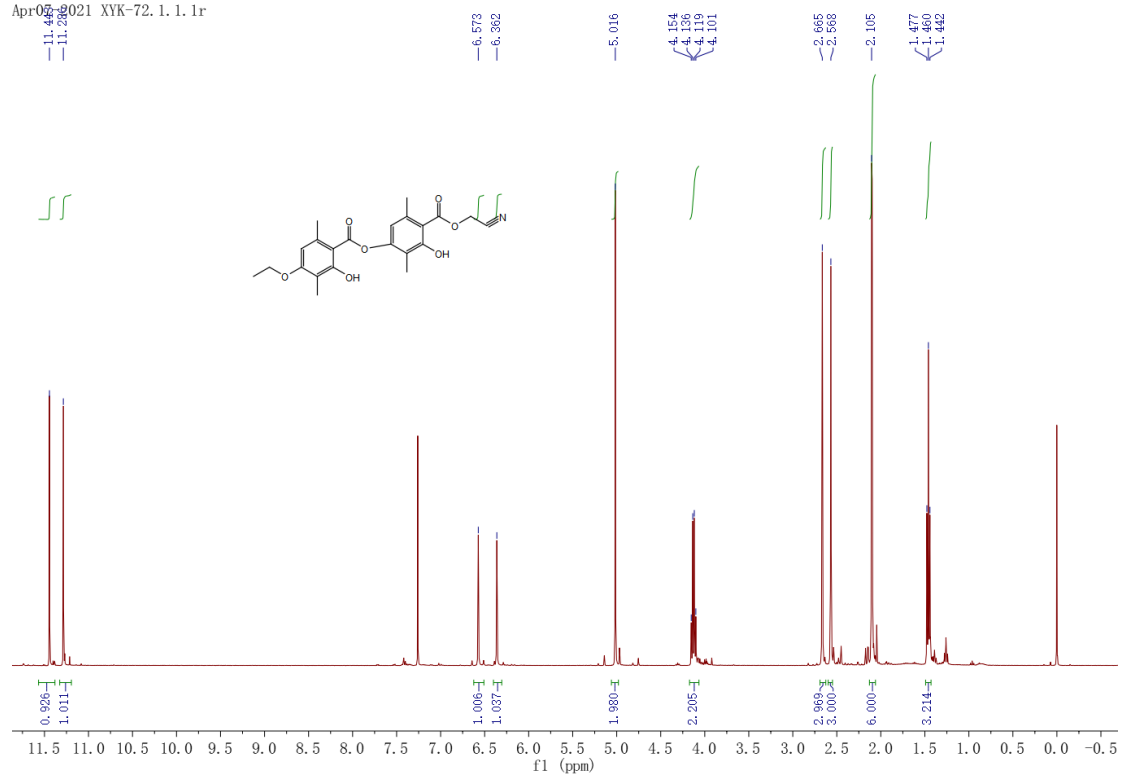

Figure S38. <sup>1</sup>H NMR spectrum of compound 6m

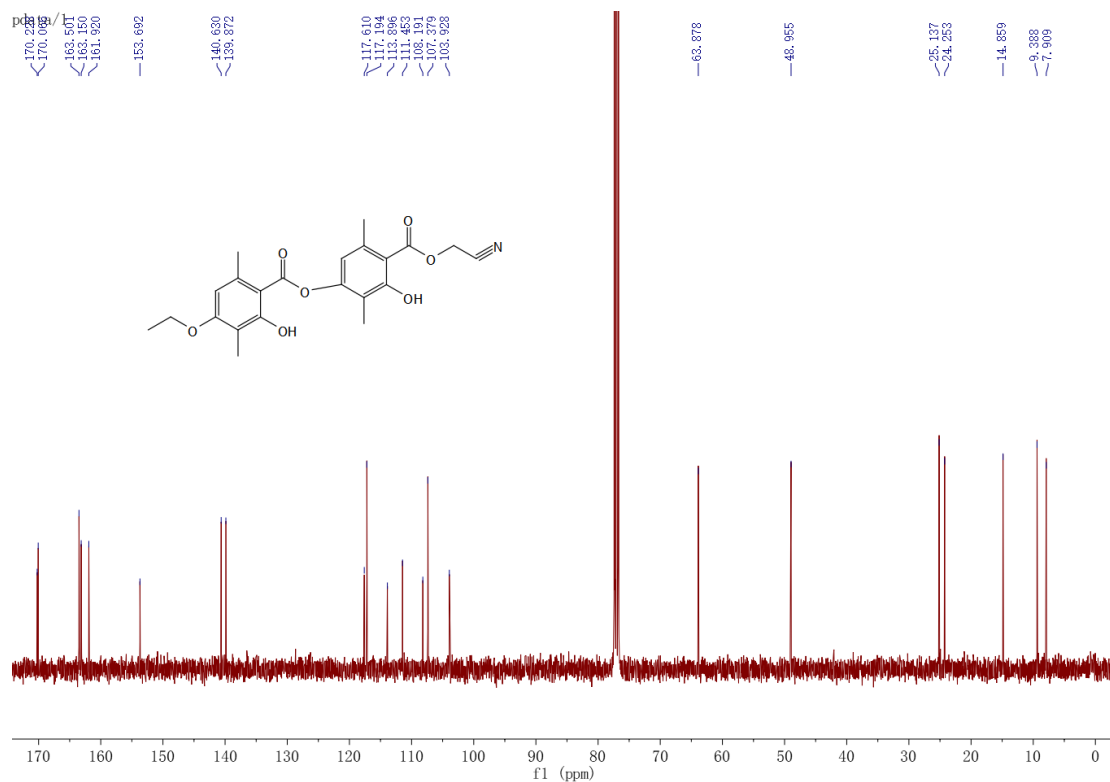

Figure S39. <sup>13</sup>C NMR spectrum of compound 6m

Item name: 7m-XYK-72-2  
Item description:

Channel name: 1: Average Time 0.1174 min : TOF MS (50-1500) ESI+ : Centroided : Combined

3.17e6

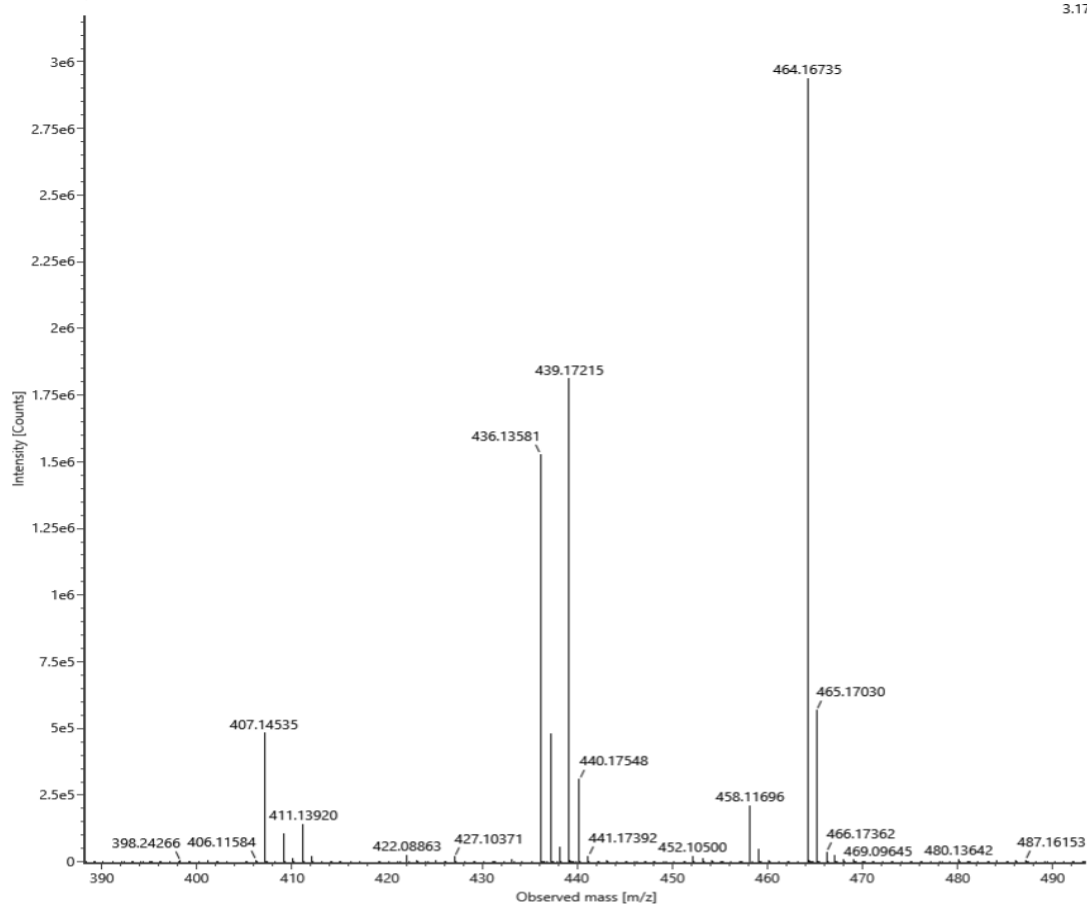

Figure S40. HRMS spectrum of compound 6m

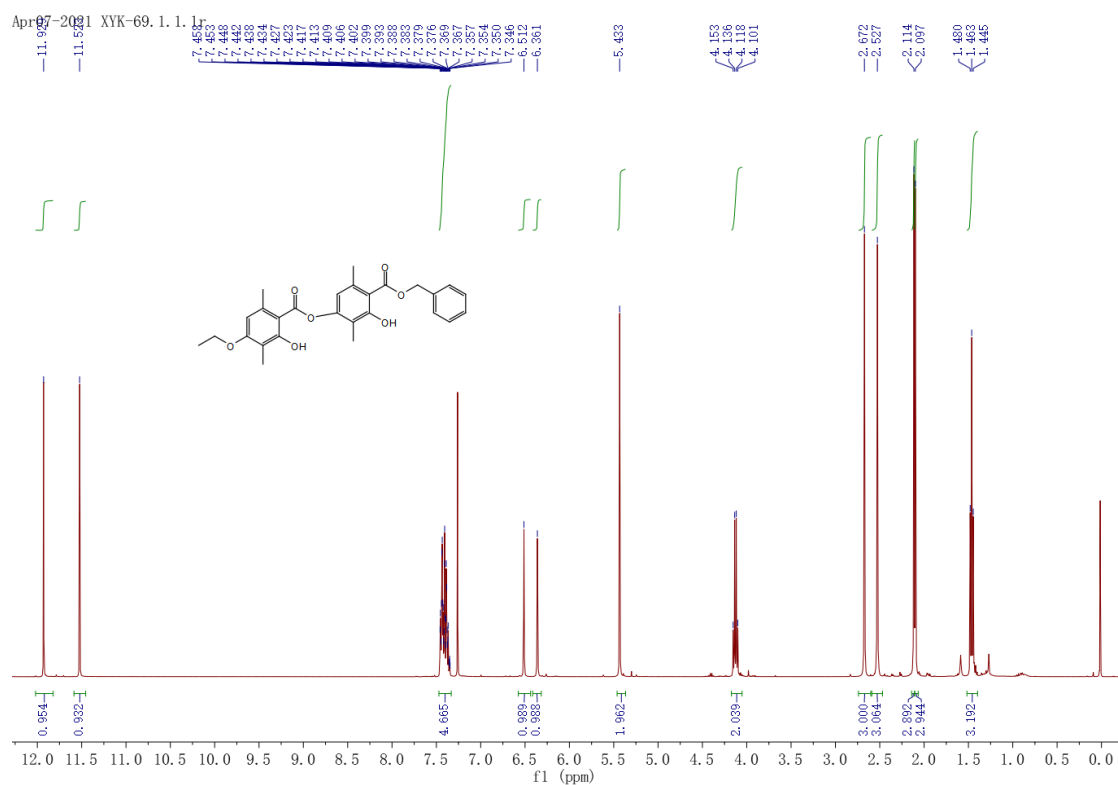

Figure S41. <sup>1</sup>H NMR spectrum of compound 6n

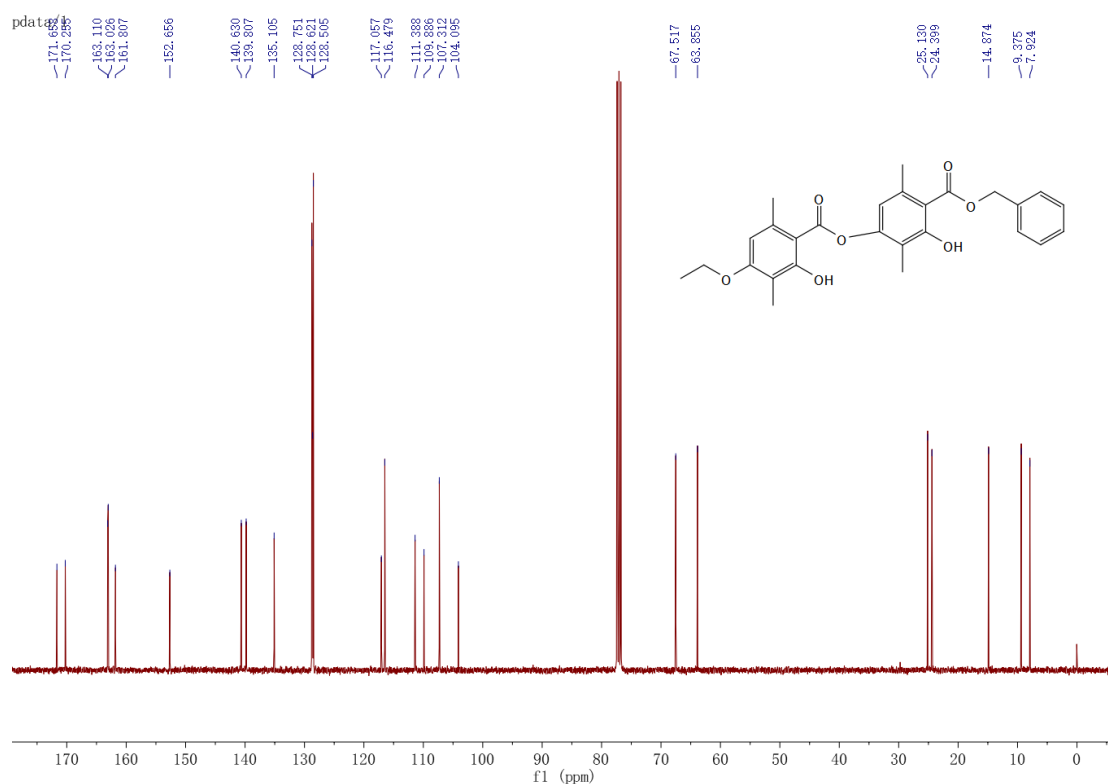

**Figure S42.**  $^{13}\text{C}$  NMR spectrum of compound **6n**

Item name: 7n-XYK-69-1  
Item description:

Channel name: 1: Average Time 0.1217 min : TOF MS (50-1500) ESI+ : Centroided : Combined

5.49e6

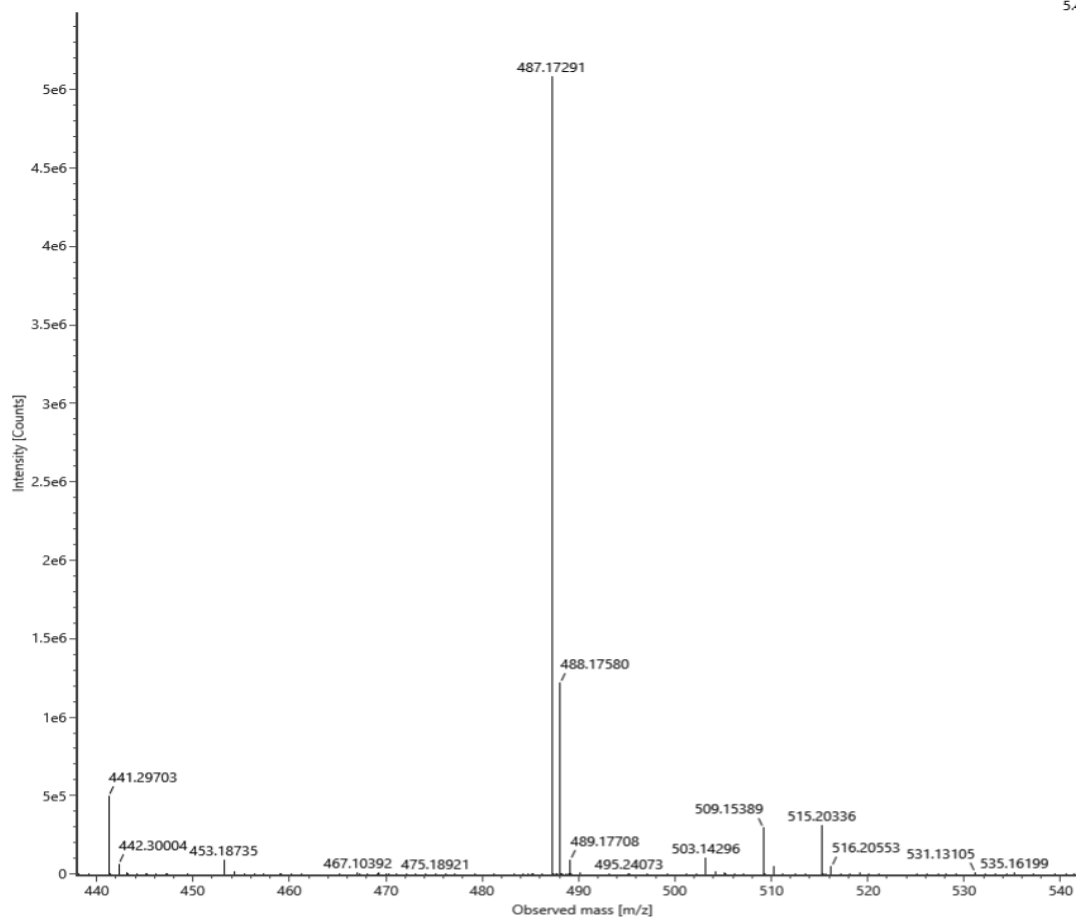

**Figure S43.** HRMS spectrum of compound **6n**

Apr20-2021 XYK-82. 1. 1. 1r

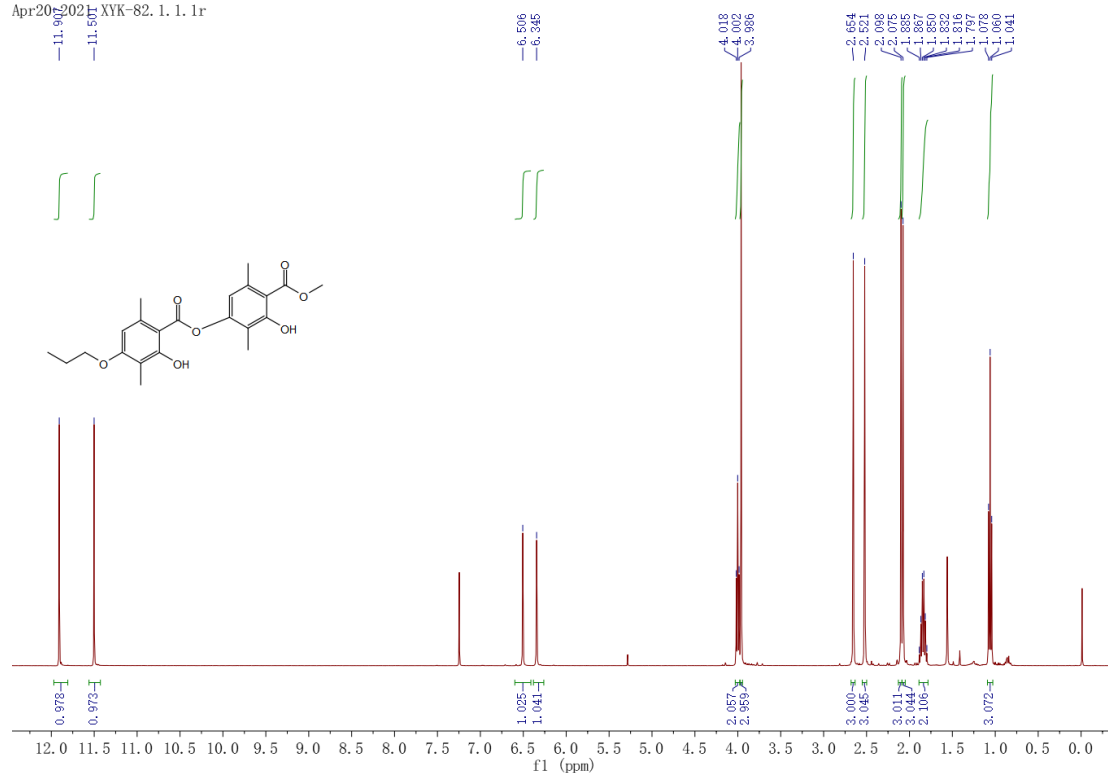

**Figure S44.** <sup>1</sup>H NMR spectrum of compound **60**

Apr20-2021 XYK-82. 1. 1. 1r

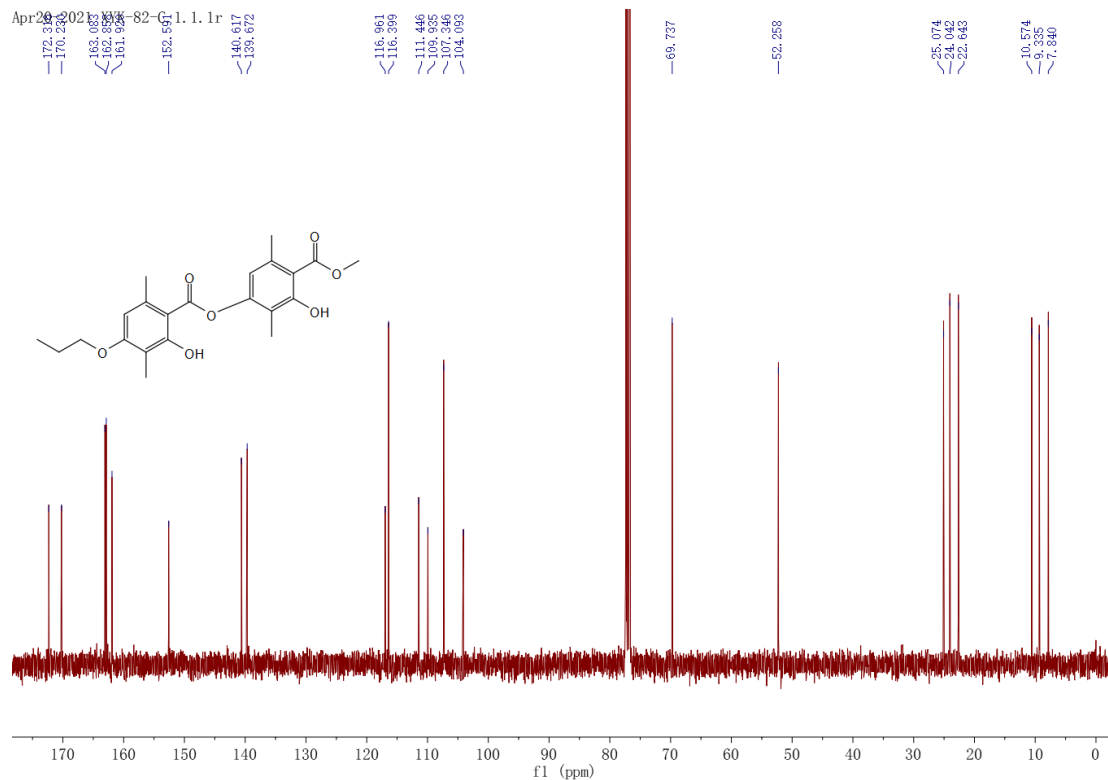

**Figure S45.** <sup>13</sup>C NMR spectrum of compound **60**

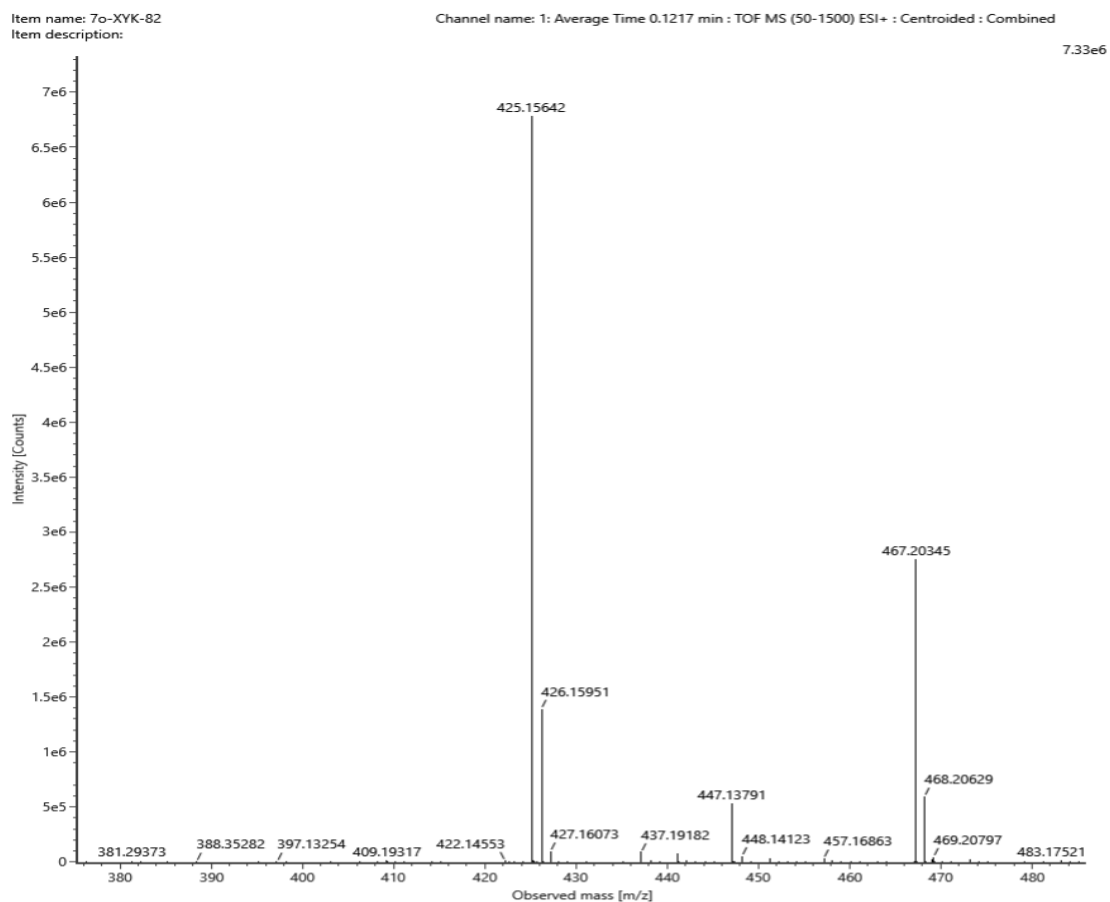

Figure S46. HRMS spectrum of compound **60**

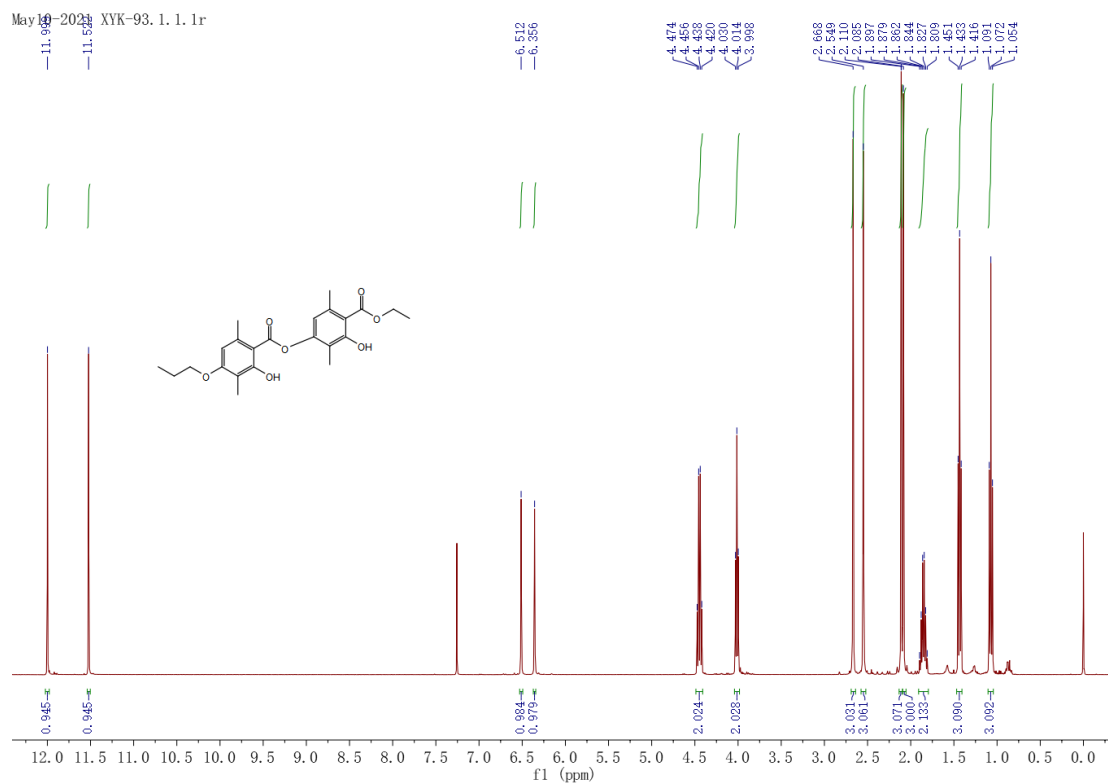

Figure S47.  $^1\text{H}$  NMR spectrum of compound **6p**

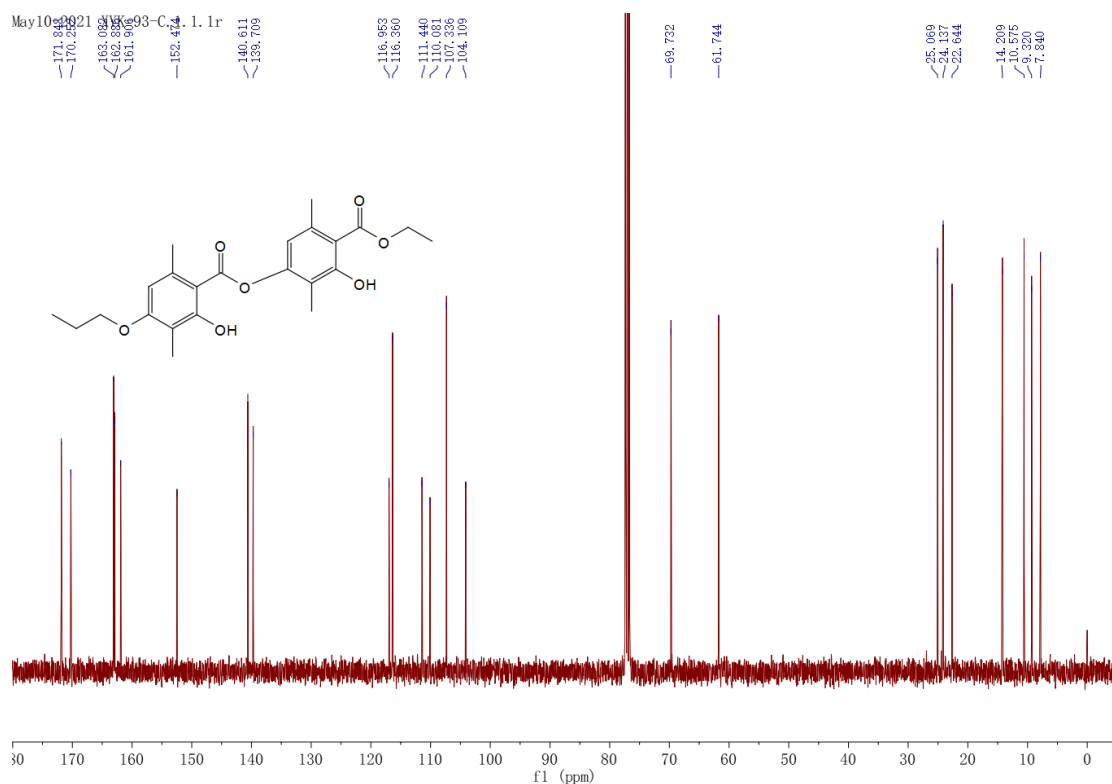

**Figure S48.**  $^{13}\text{C}$  NMR spectrum of compound **6p**

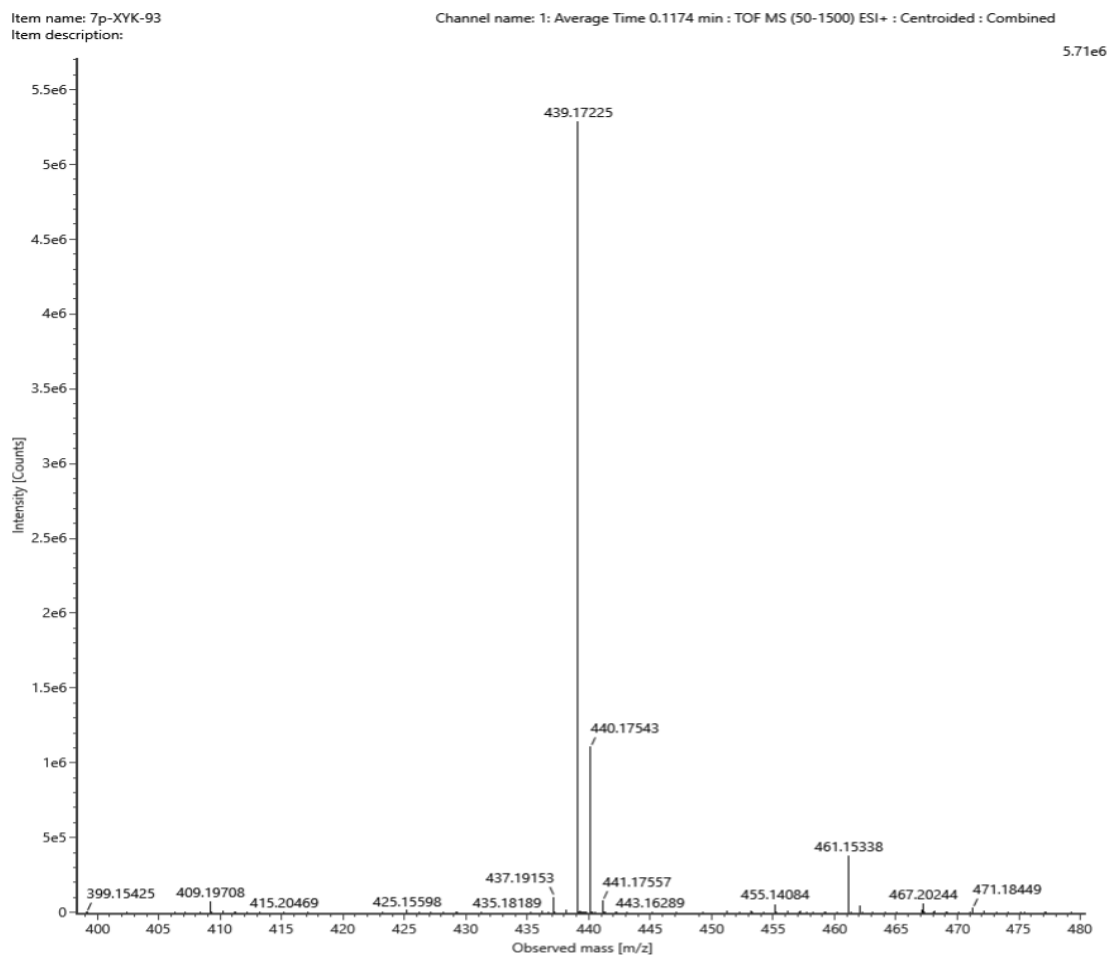

**Figure S49.** HRMS spectrum of compound **6p**

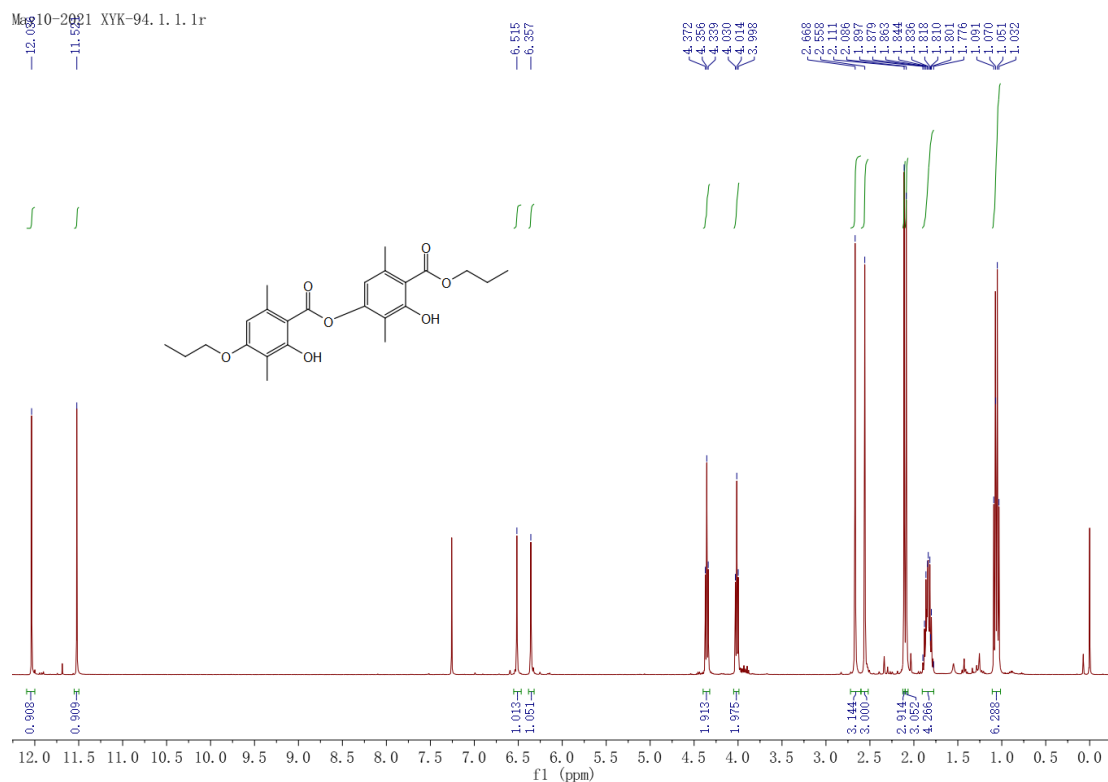

Figure S50.  $^1\text{H}$  NMR spectrum of compound 6q

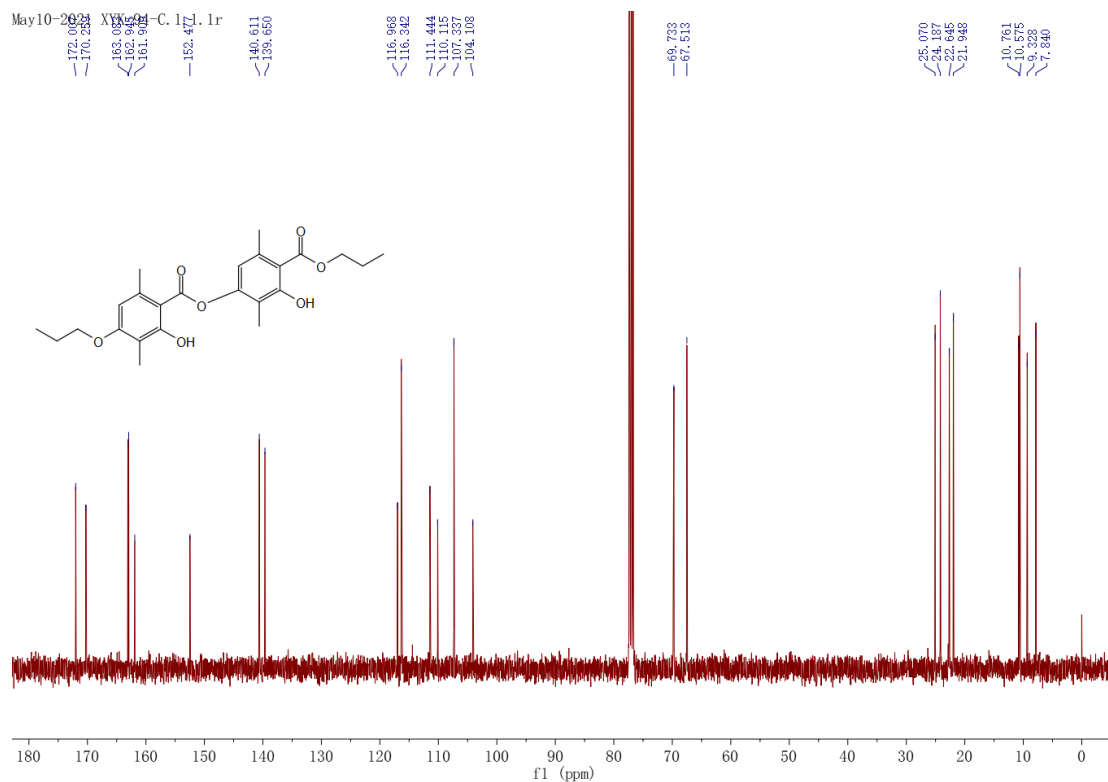

Figure S51.  $^{13}\text{C}$  NMR spectrum of compound 6q

Item name: 7q-XYK-94  
Item description:

Channel name: 1: Average Time 0.1217 min : TOF MS (50-1500) ESI+ : Centroided : Combined

9.69e6

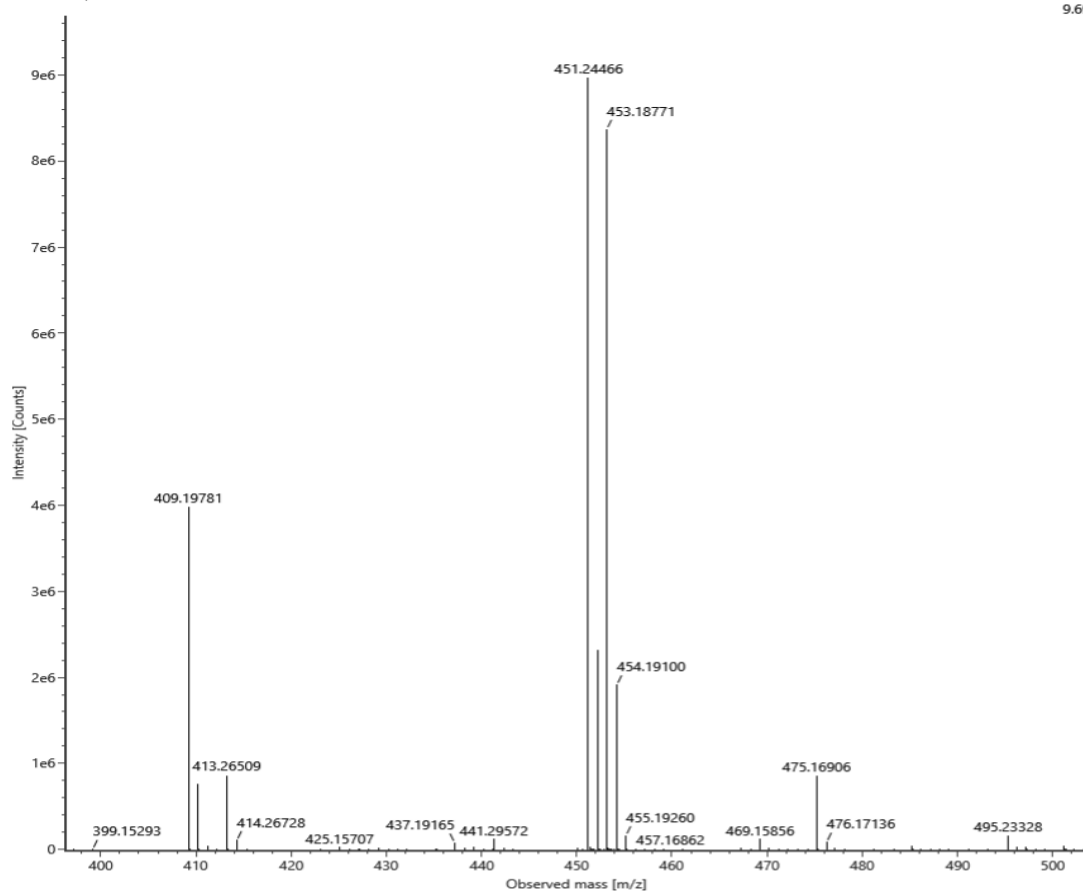

Figure S52. HRMS spectrum of compound 6q

May10-2021 XYK-96, 1. 1. 1r

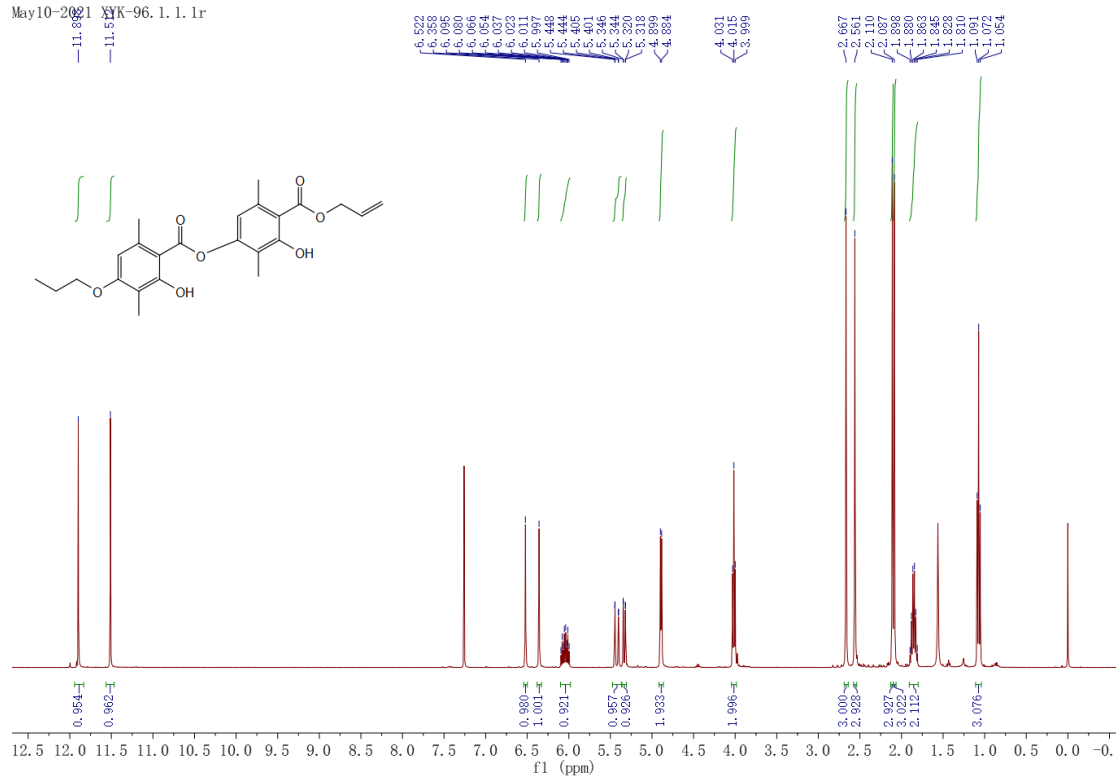

Figure S53.  $^1\text{H}$  NMR spectrum of compound 6r

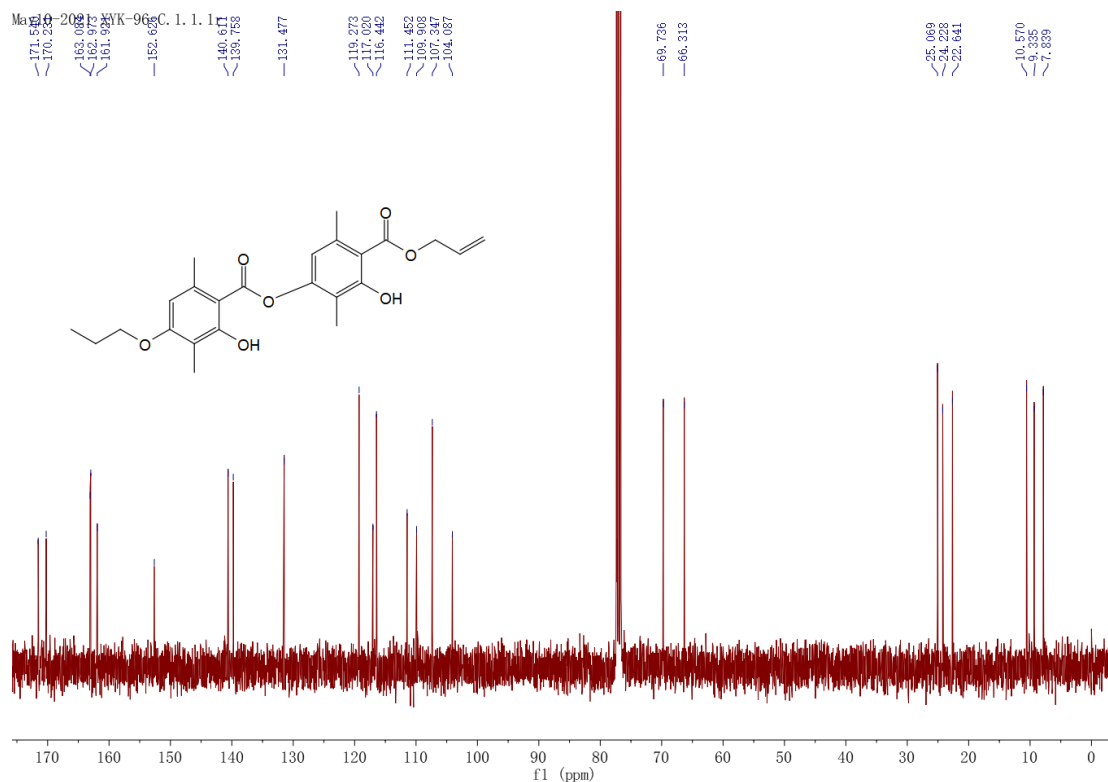

**Figure S54.**  $^{13}\text{C}$  NMR spectrum of compound **6r**

Item name: 7r-XYK-96  
Item description:

Channel name: 1: Average Time 0.1174 min : TOF MS (50-1500) ESI+ : Centroided : Combined

9.46e6

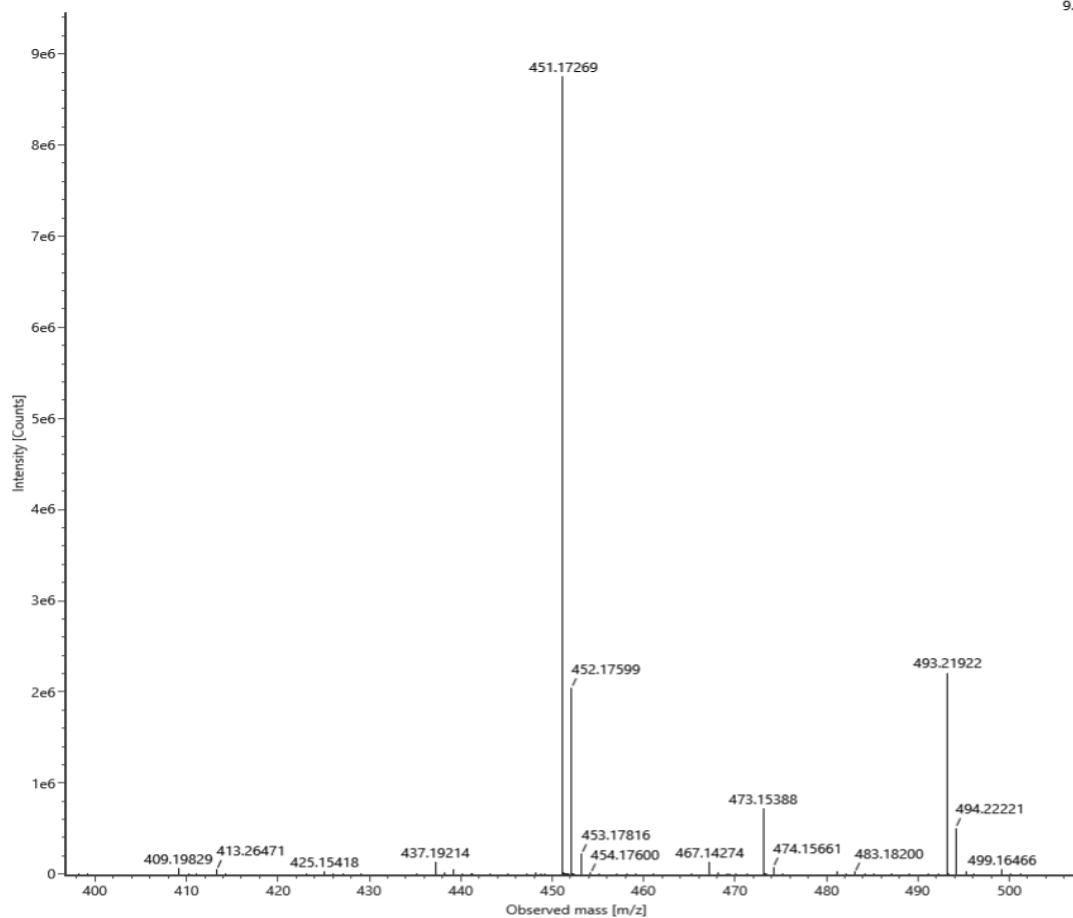

**Figure S55.** HRMS spectrum of compound **6r**

Apr20-2021 XYK-84. 1. 1. 1r

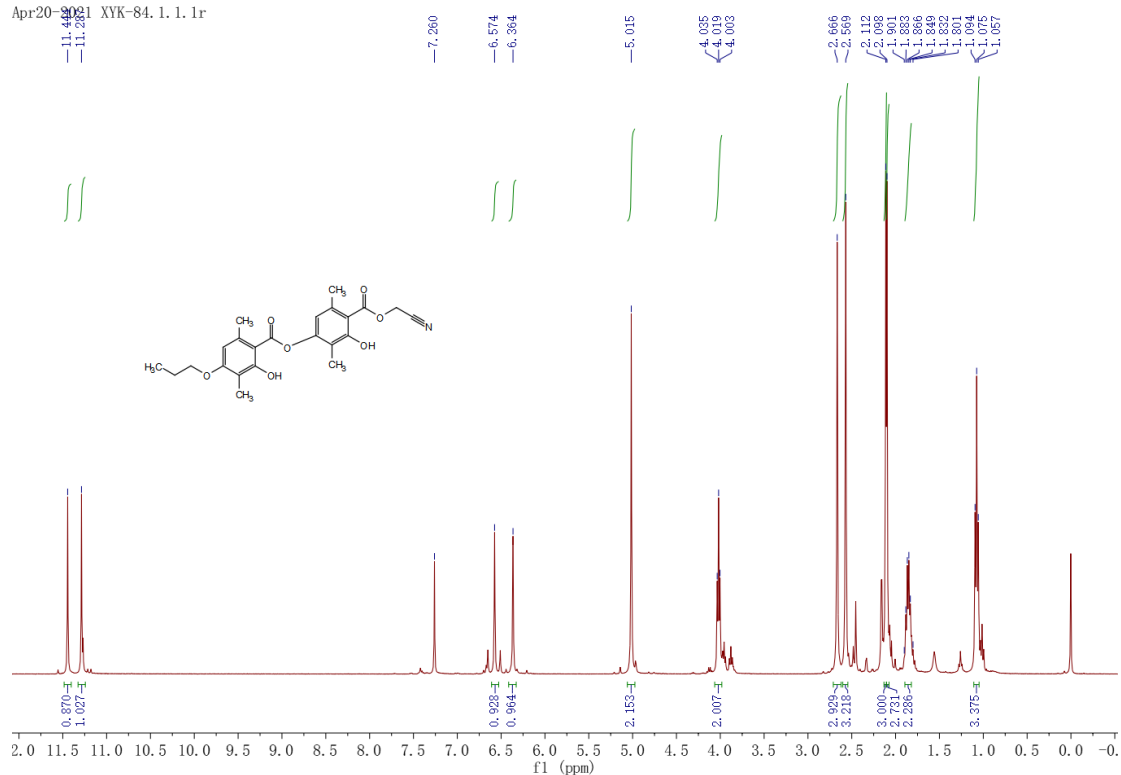

Figure S56. <sup>1</sup>H NMR spectrum of compound **6s**

Apr20-2021 XYK-84. C. 1. 1. 1r

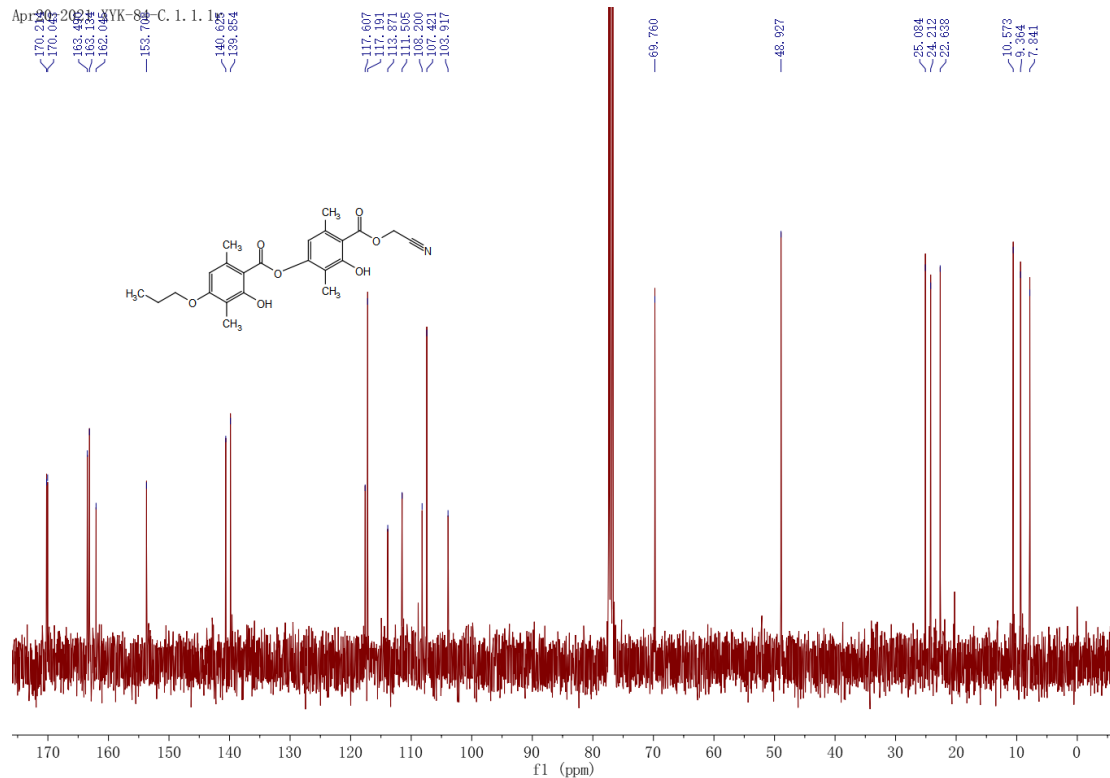

Figure S57. <sup>13</sup>C NMR spectrum of compound **6s**

Item name: 7s-XYK-84  
Item description:

Channel name: 1: Average Time 0.1174 min : TOF MS (50-1500) ESI+ : Centroided : Combined

4.98e6

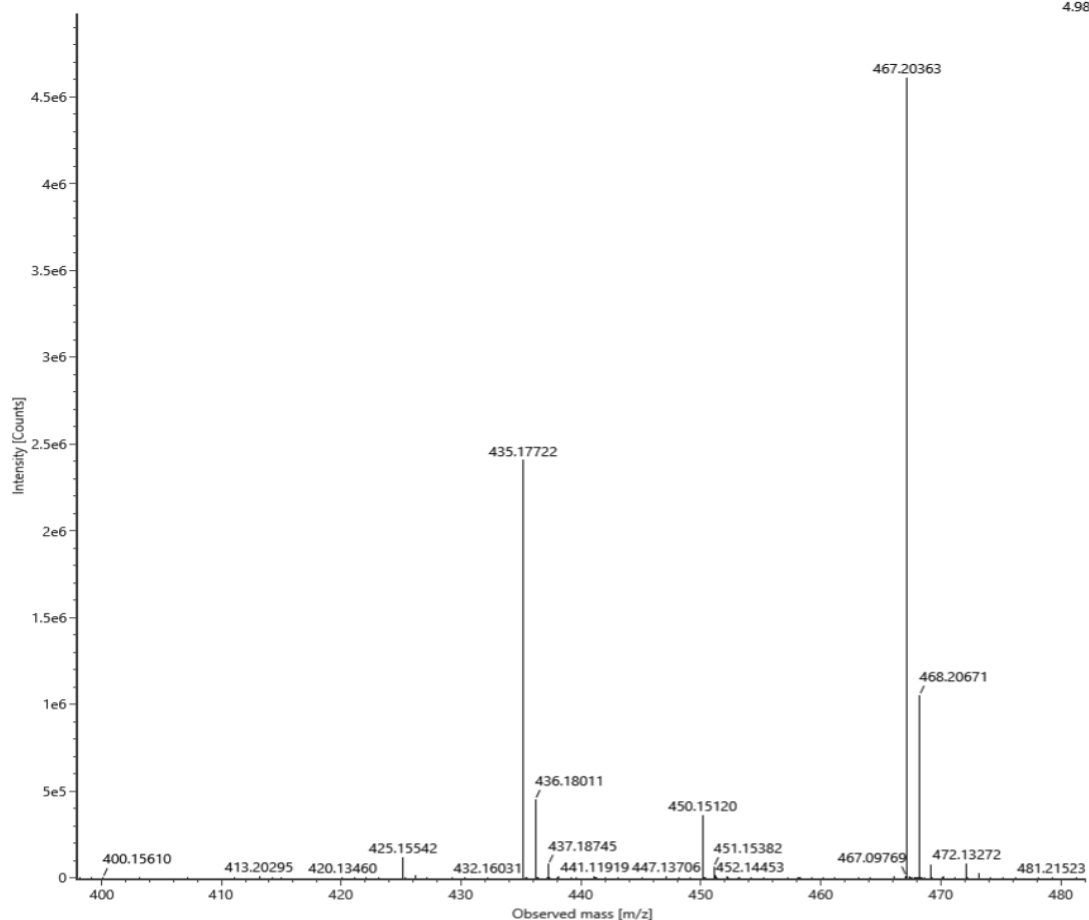

Figure S58. HRMS spectrum of compound 6s

Jul22, 2021, XYK-109, 1, 1, 1r

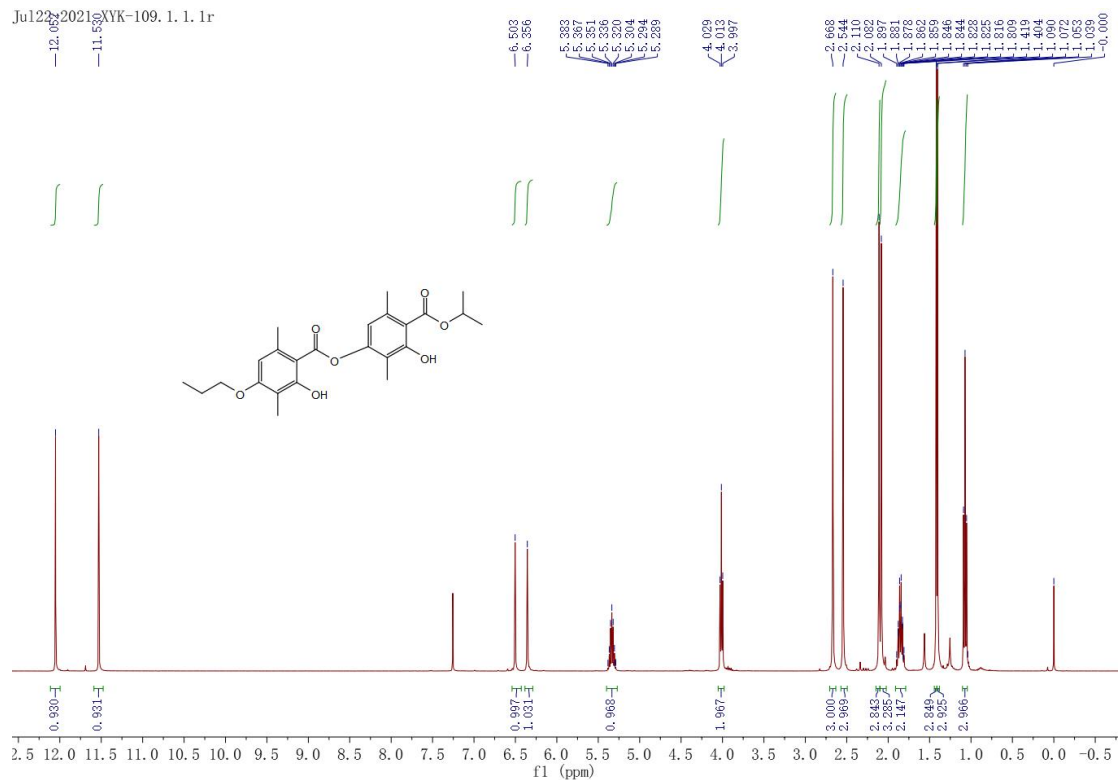

Figure S59. <sup>1</sup>H NMR spectrum of compound 6t

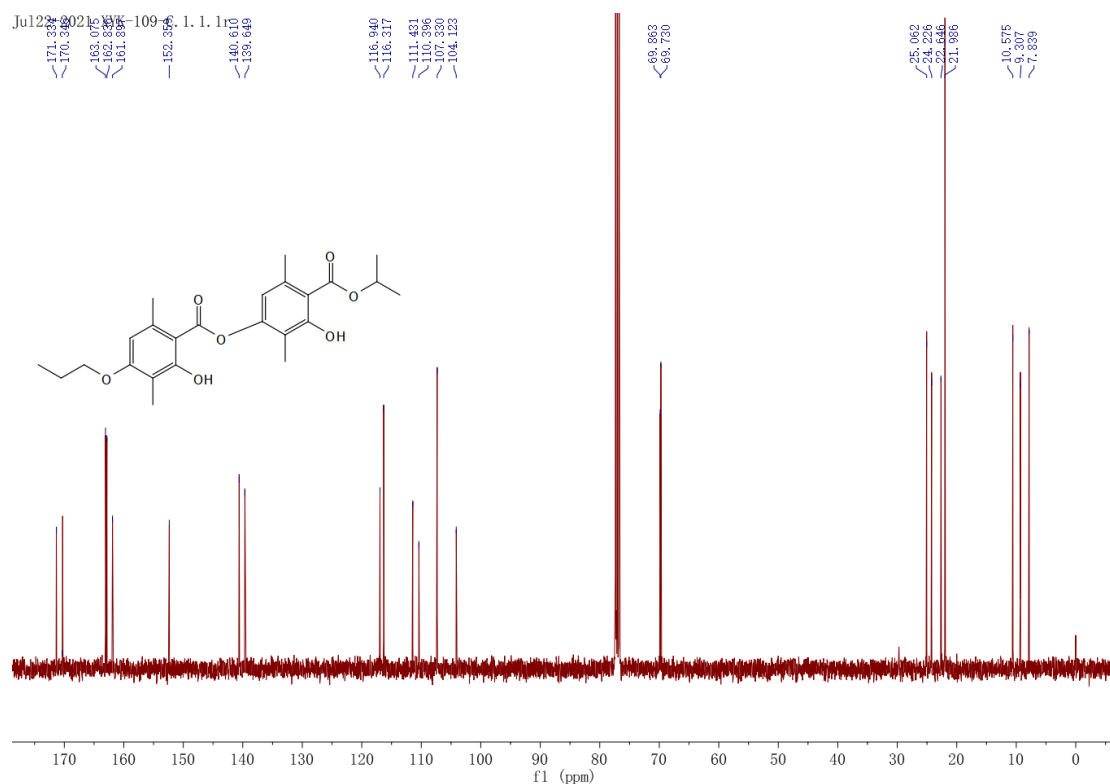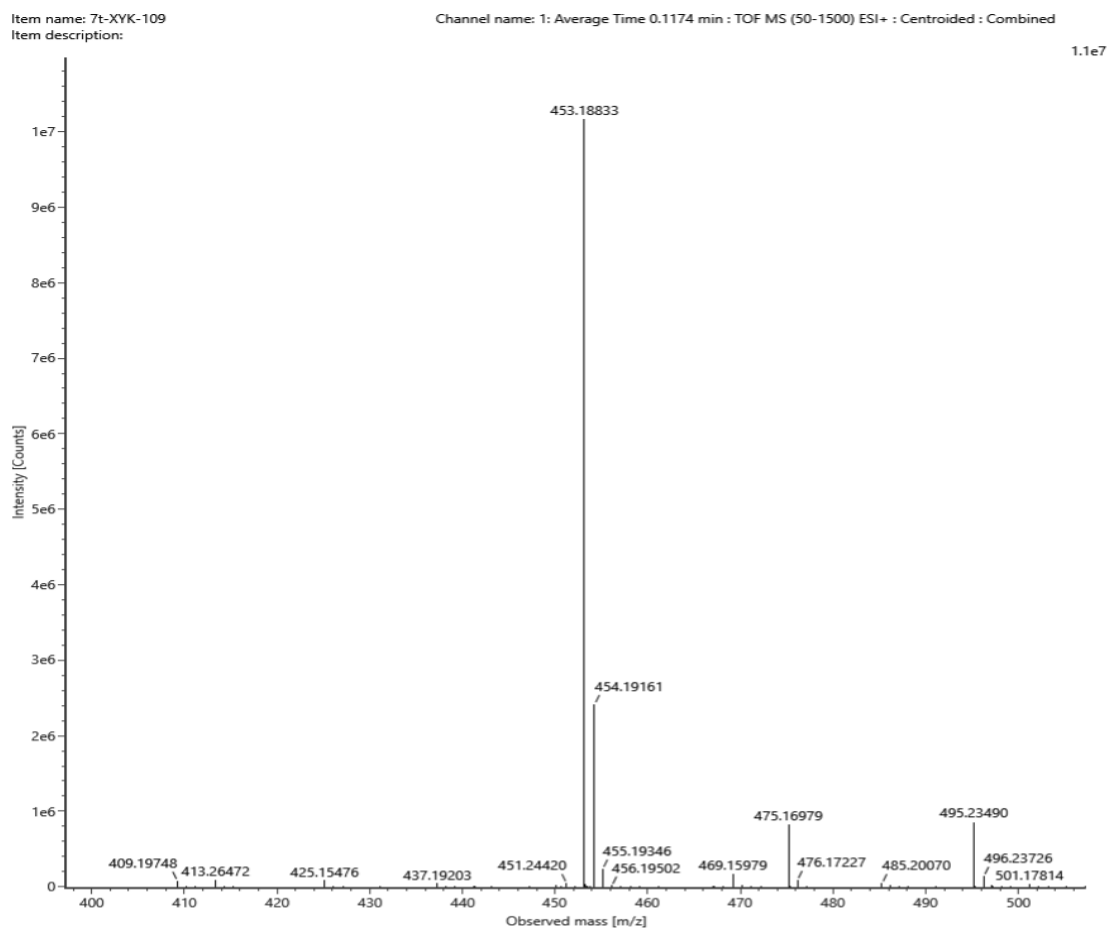

Apr20-2021-XYK-83. 1. 1. 1r

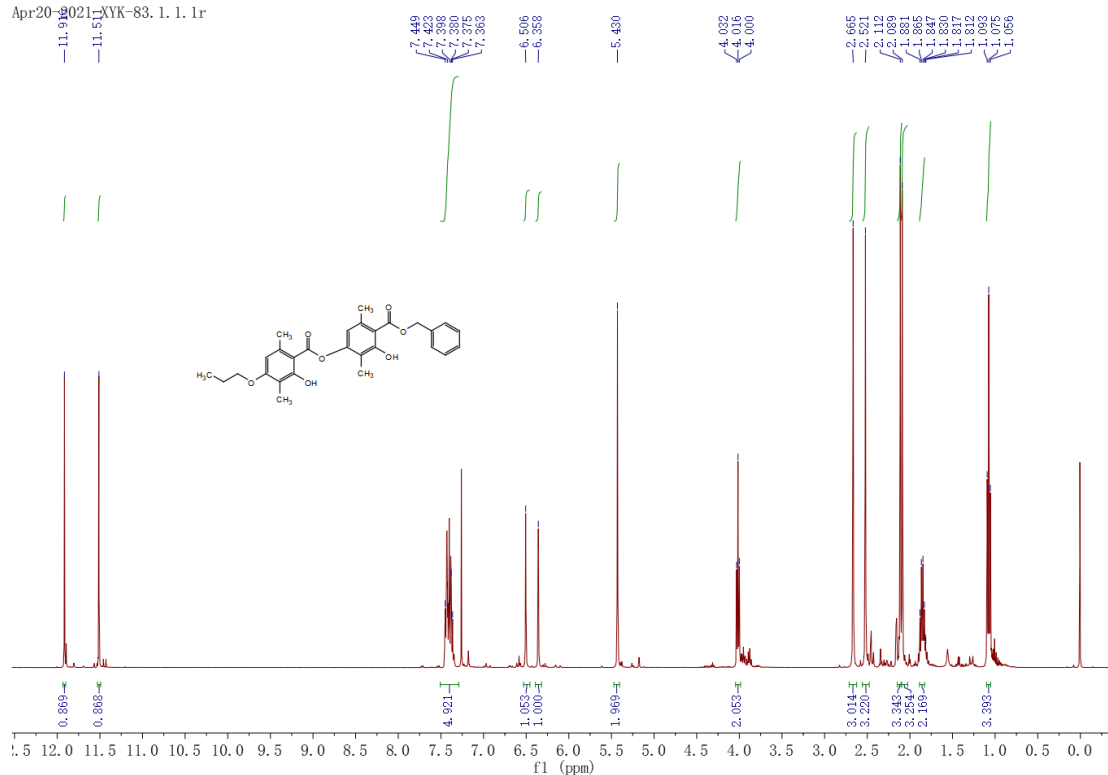

Figure S62. <sup>1</sup>H NMR spectrum of compound 6u

Apr20-2021-XYK-83-C-1. 1. 1r

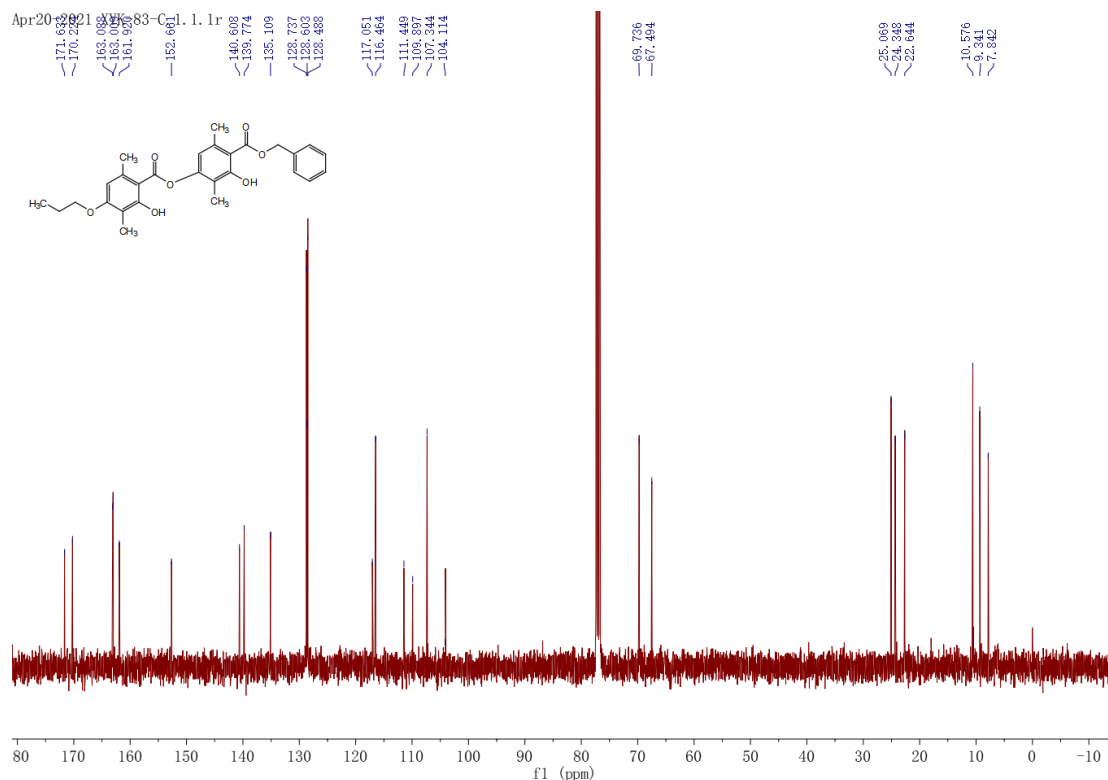

Figure S63. <sup>13</sup>C NMR spectrum of compound 6u

Item name: 7v-XYK-83  
Item description:

Channel name: 1: Average Time 0.1334 min : TOF MS (50-1500) ESI+ : Centroided : Combined

2.56e6

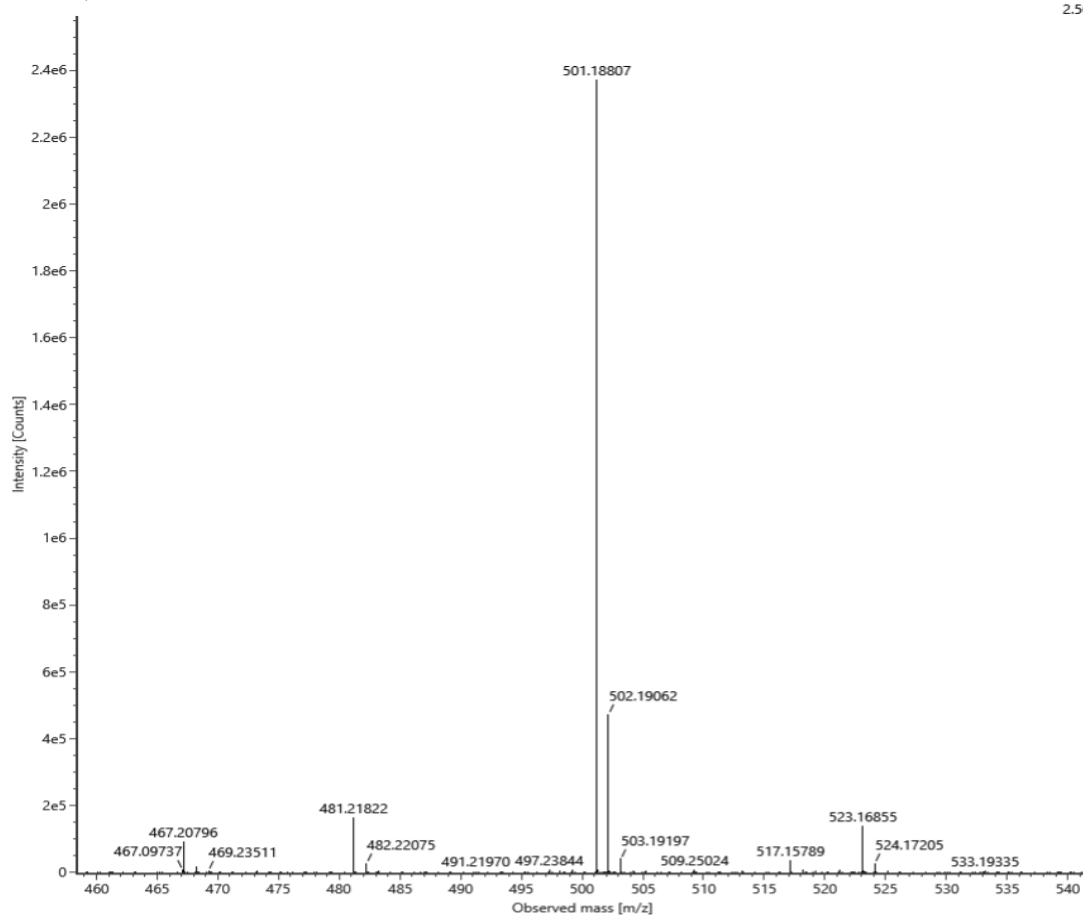

Figure S64. HRMS spectrum of compound 6u

Jun28-2021 XYK-110. 1. 1. 1r

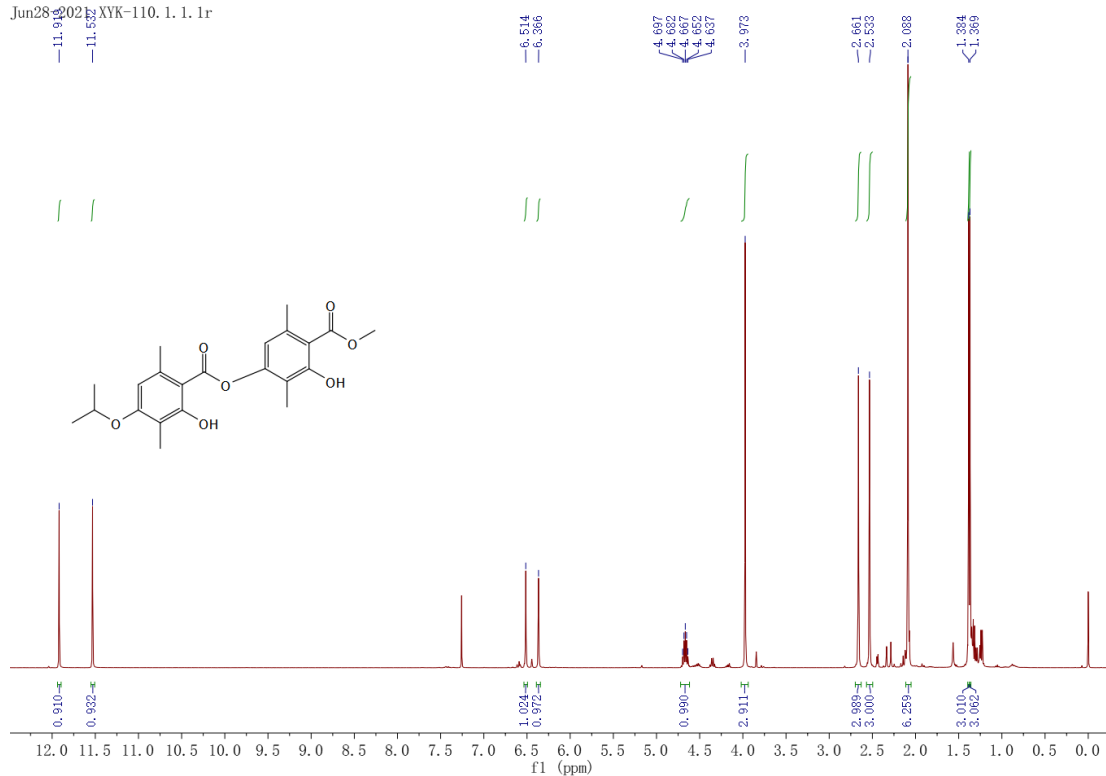

Figure S65. <sup>1</sup>H NMR spectrum of compound 6v

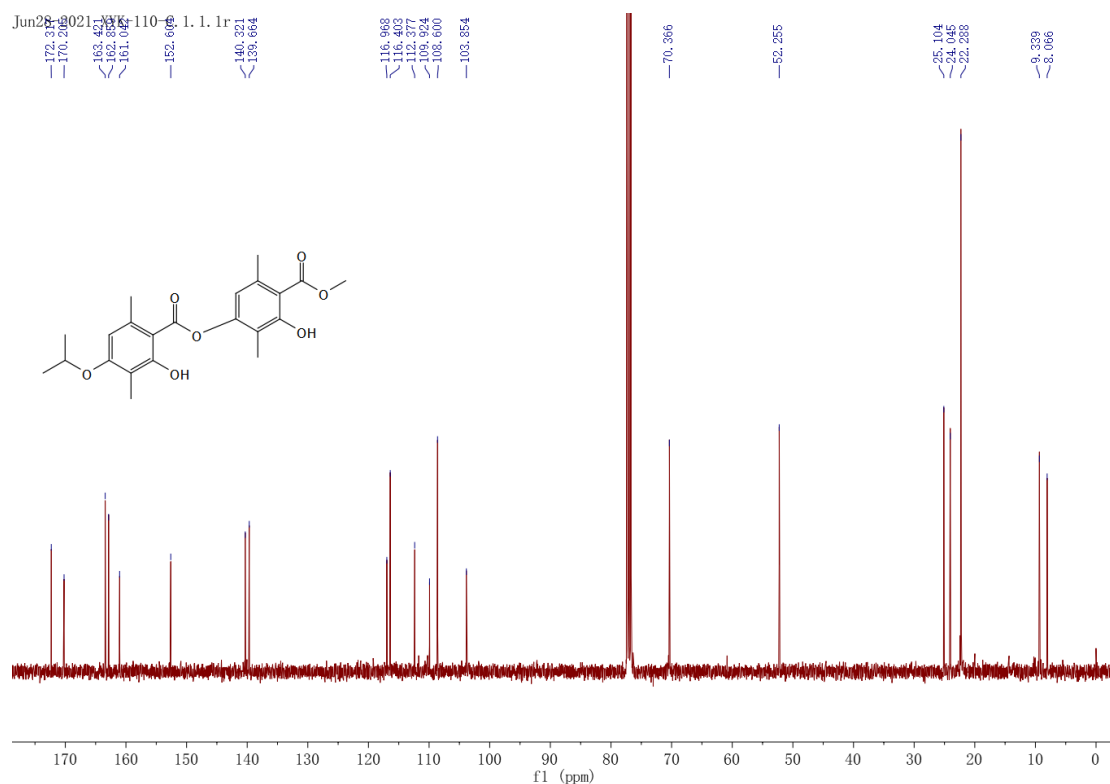

**Figure S66.**  $^{13}\text{C}$  NMR spectrum of compound **6v**

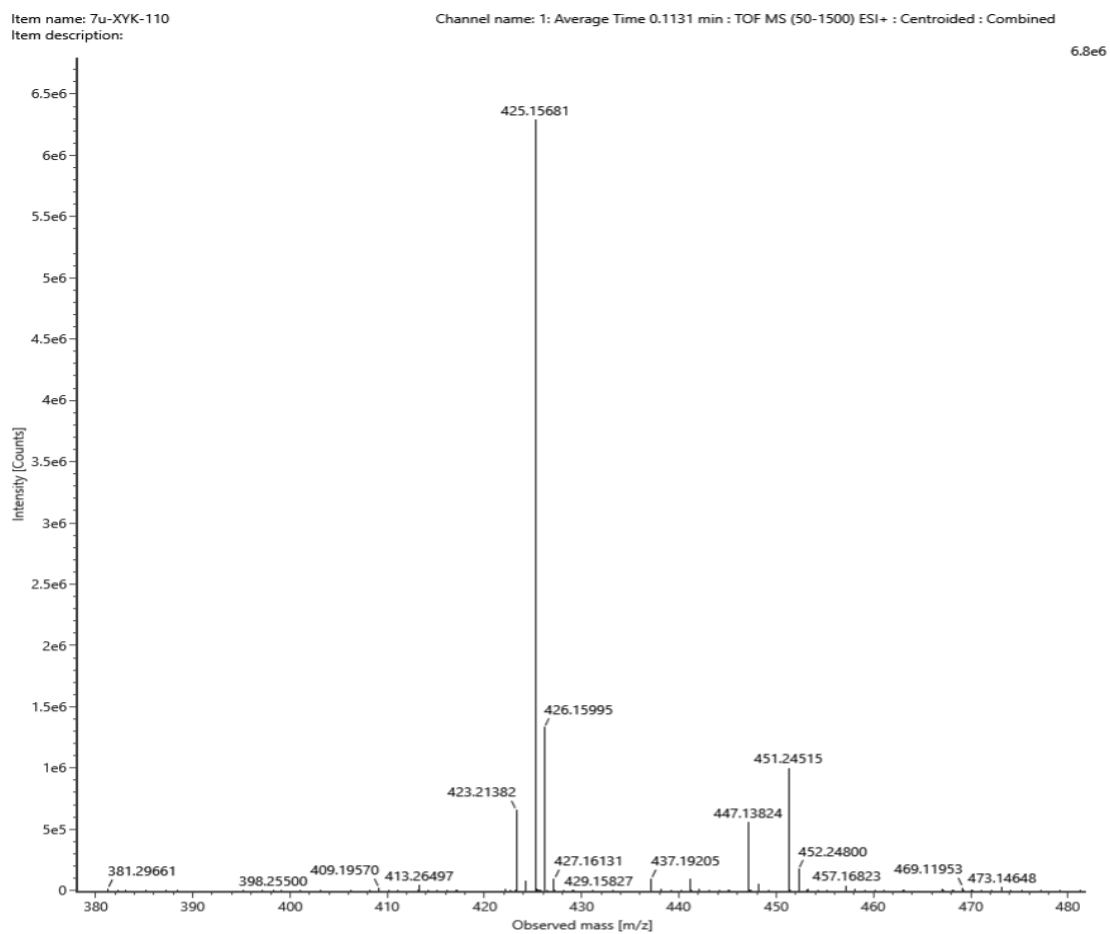

**Figure S67.** HRMS spectrum of compound **6v**

Jul22-2021 XYK-111. 1. 1. 1r

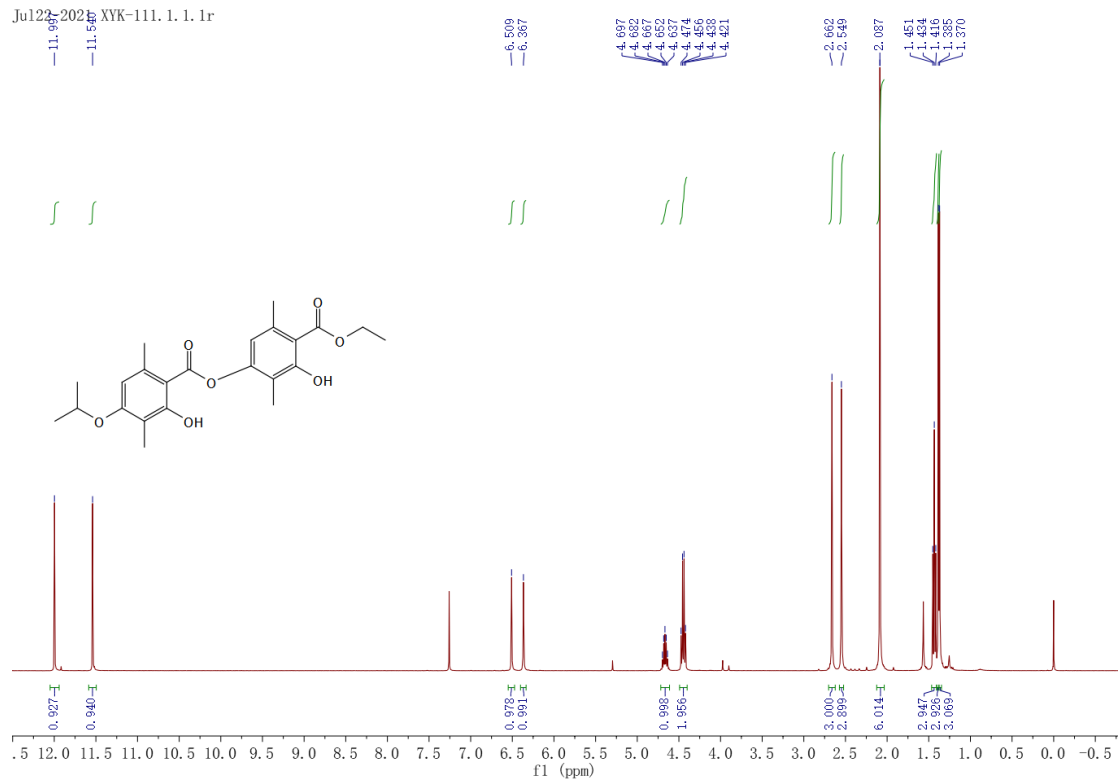

Figure S68. <sup>1</sup>H NMR spectrum of compound 6w

Jul22-2021 XYK-111-C. 1. 1. 1r

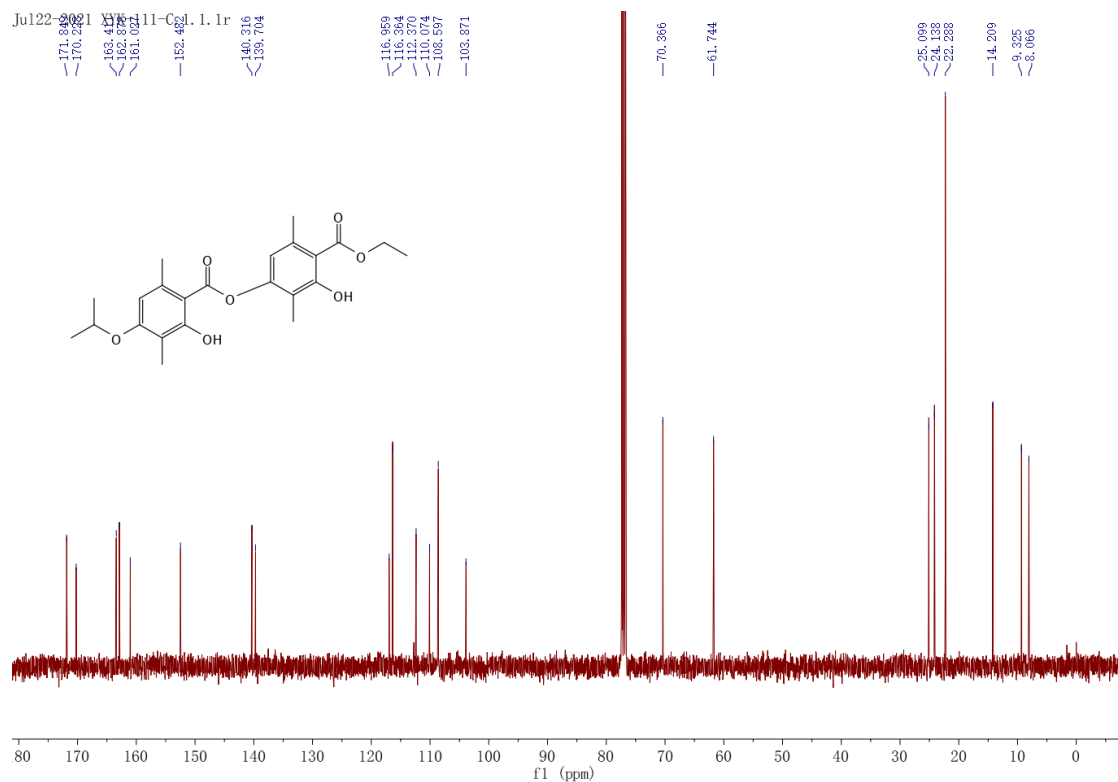

Figure S69. <sup>13</sup>C NMR spectrum of compound 6w

Item name: 7w-XYK-111  
Item description:

Channel name: 1: Average Time 0.1174 min : TOF MS (50-1500) ESI+ : Centroided : Combined

4.99e7

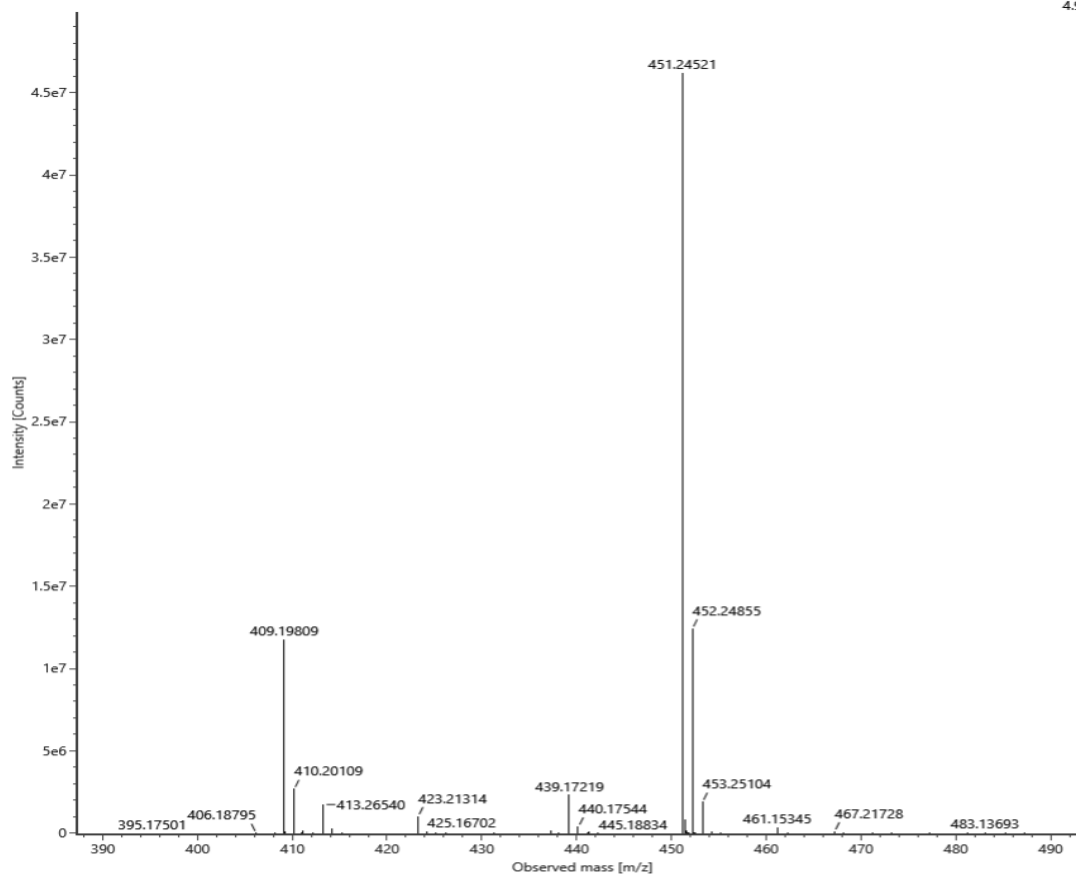

Figure S70. HRMS spectrum of compound 6w

Jun28-2021 XYK-112. 1. 1. 1r

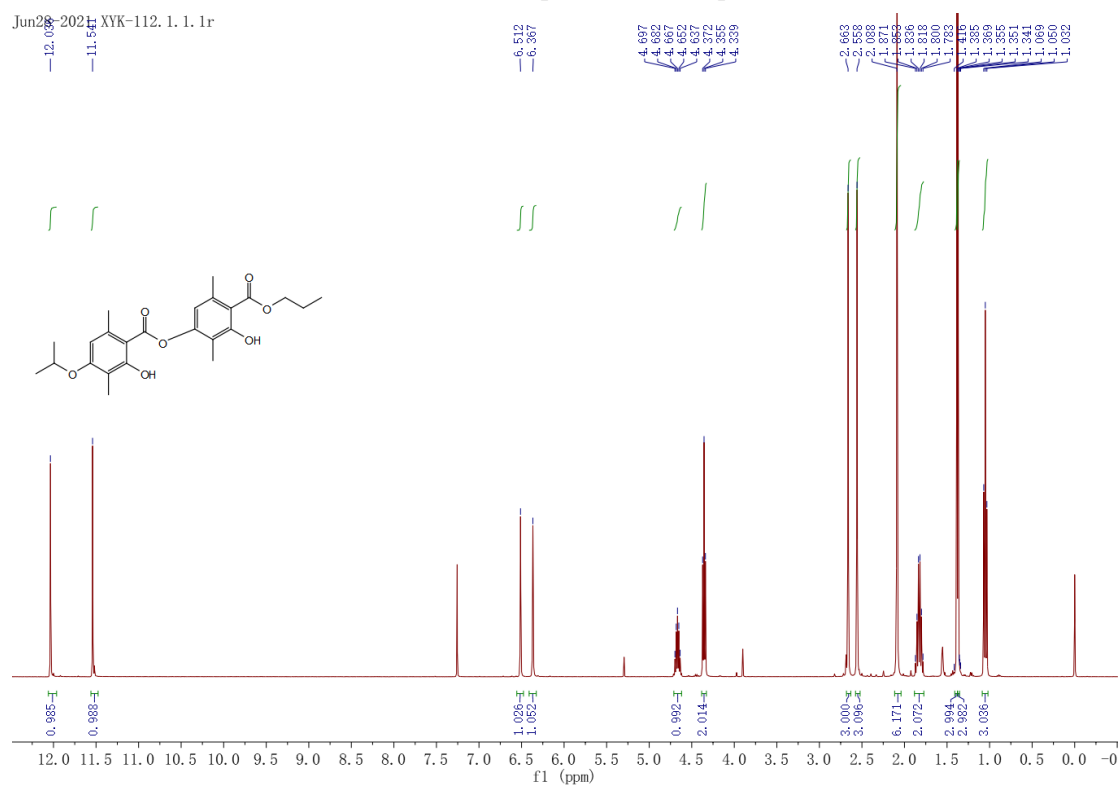

Figure S71. <sup>1</sup>H NMR spectrum of compound 6x

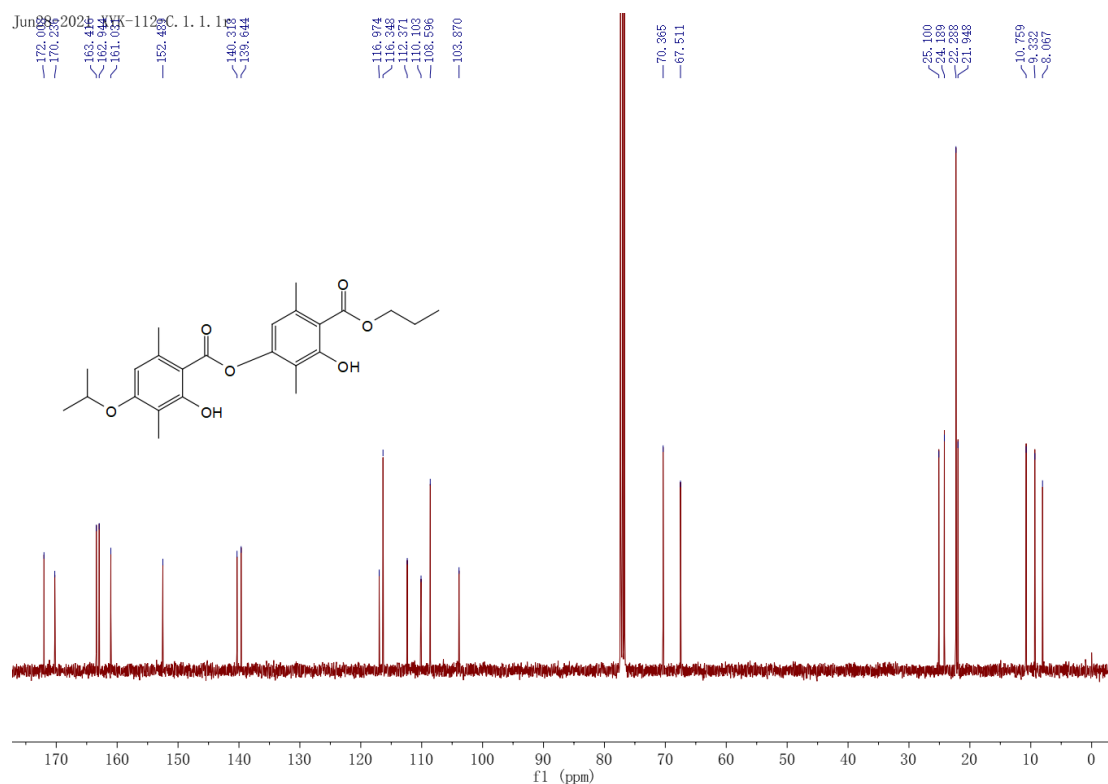

**Figure S72.**  $^{13}\text{C}$  NMR spectrum of compound **6x**

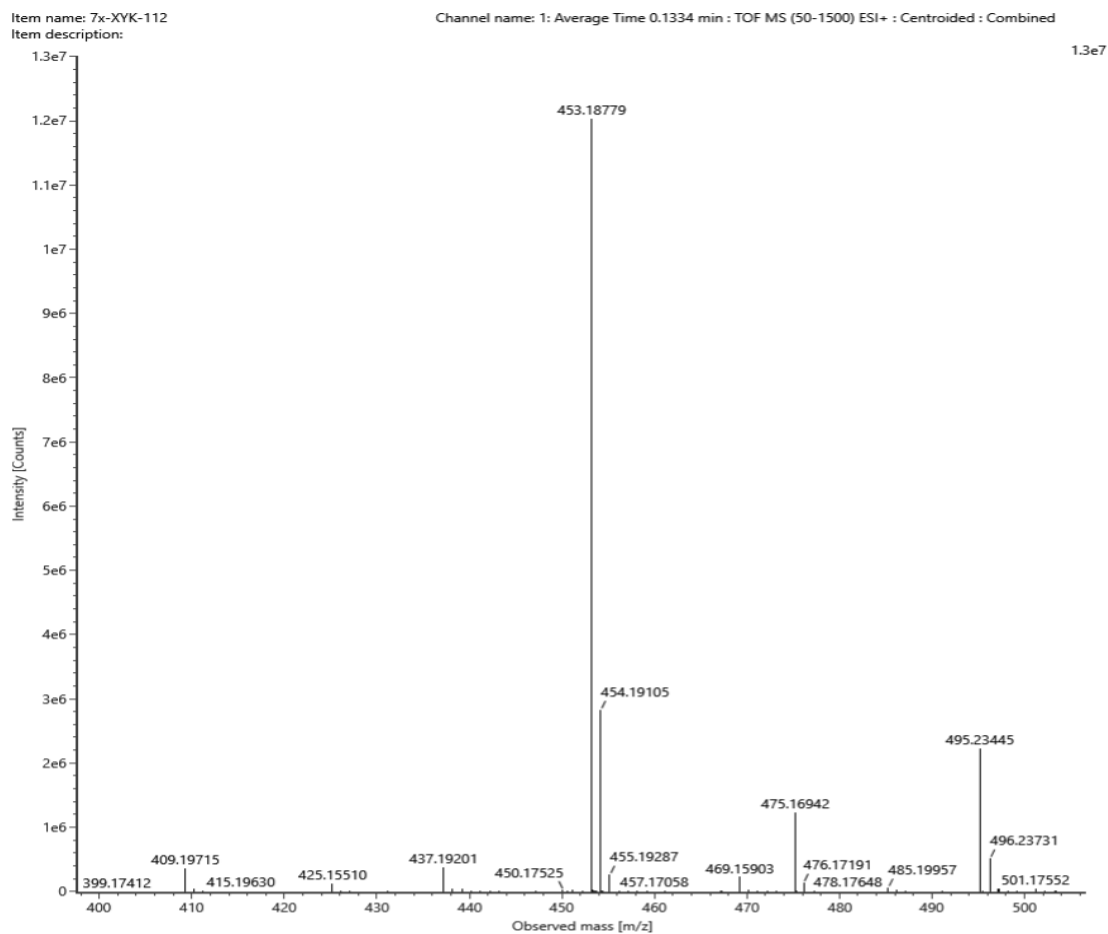

**Figure S73.** HRMS spectrum of compound **6x**

Jul29-2021 XYK-115. 1. 1. 1r

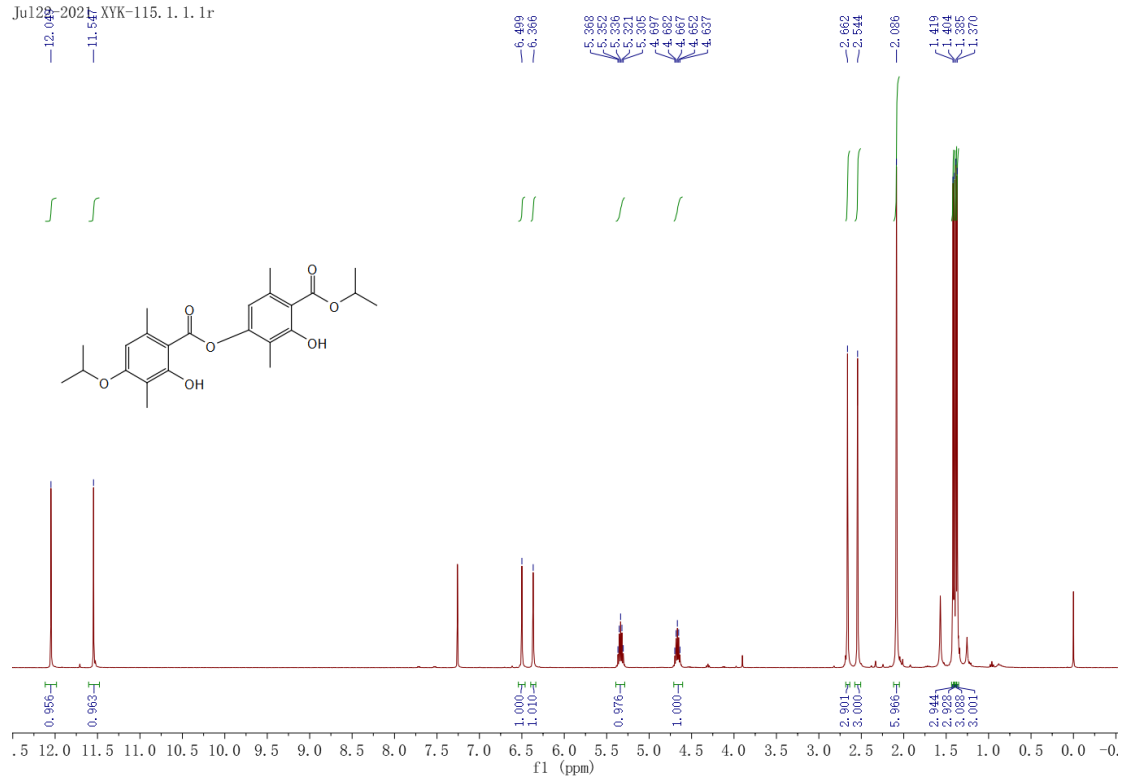

Figure S74. <sup>1</sup>H NMR spectrum of compound 6y

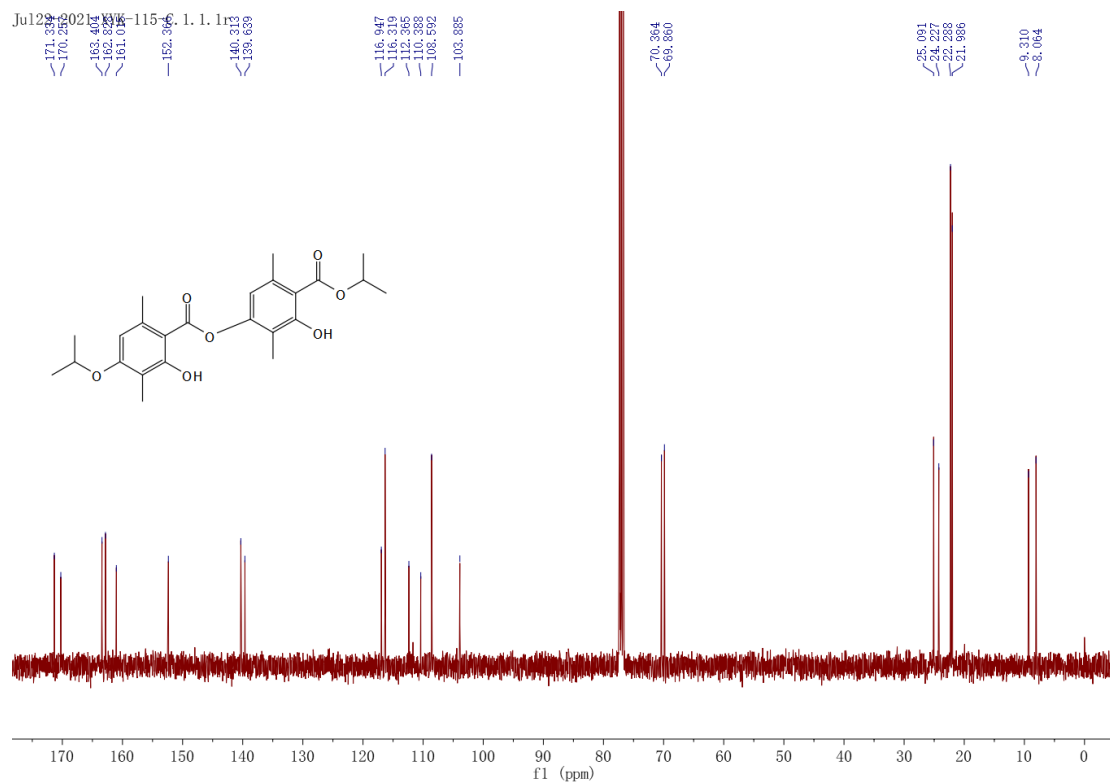

Figure S75. <sup>13</sup>C NMR spectrum of compound 6y

Item name: 7y-XYK-115  
Item description:

Channel name: 1: Average Time 0.1548 min : TOF MS (50-1500) ESI+ : Centroided : Combined

1.95e7

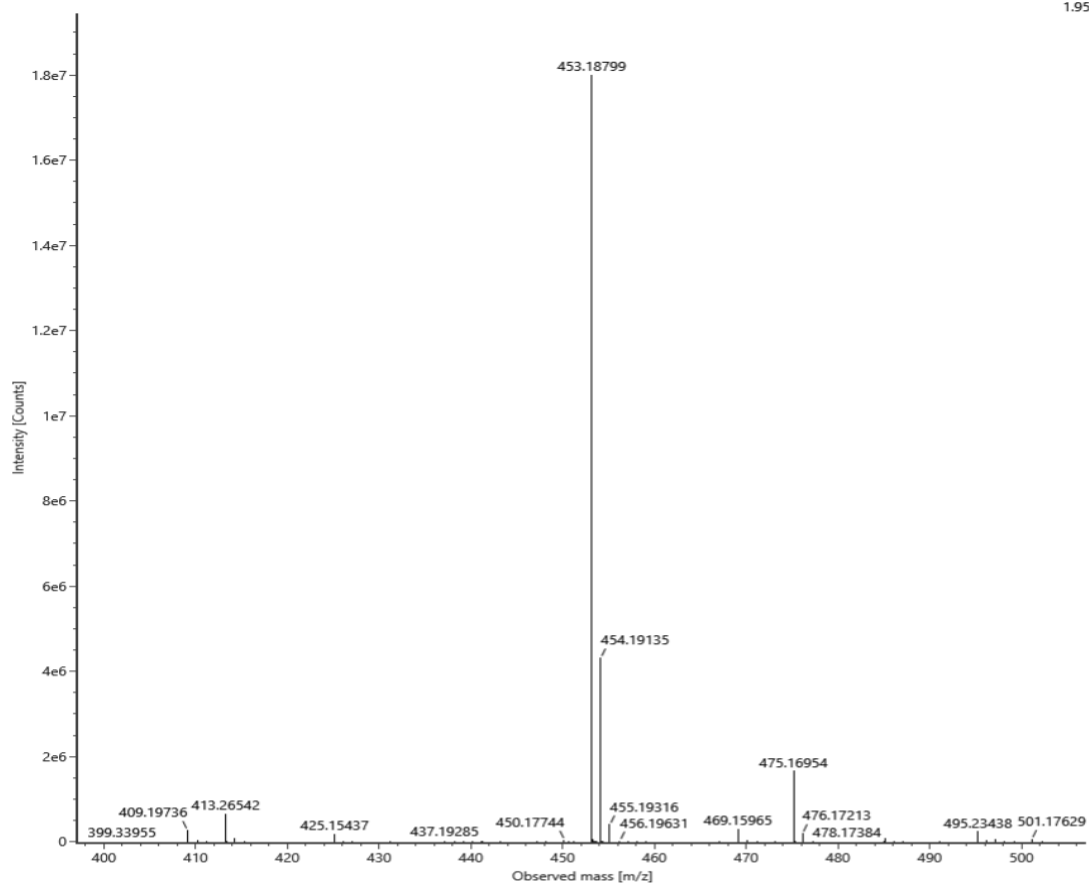

Figure S76. HRMS spectrum of compound 6y

Jun28-2021 XYK-113. 1. 1. 1r

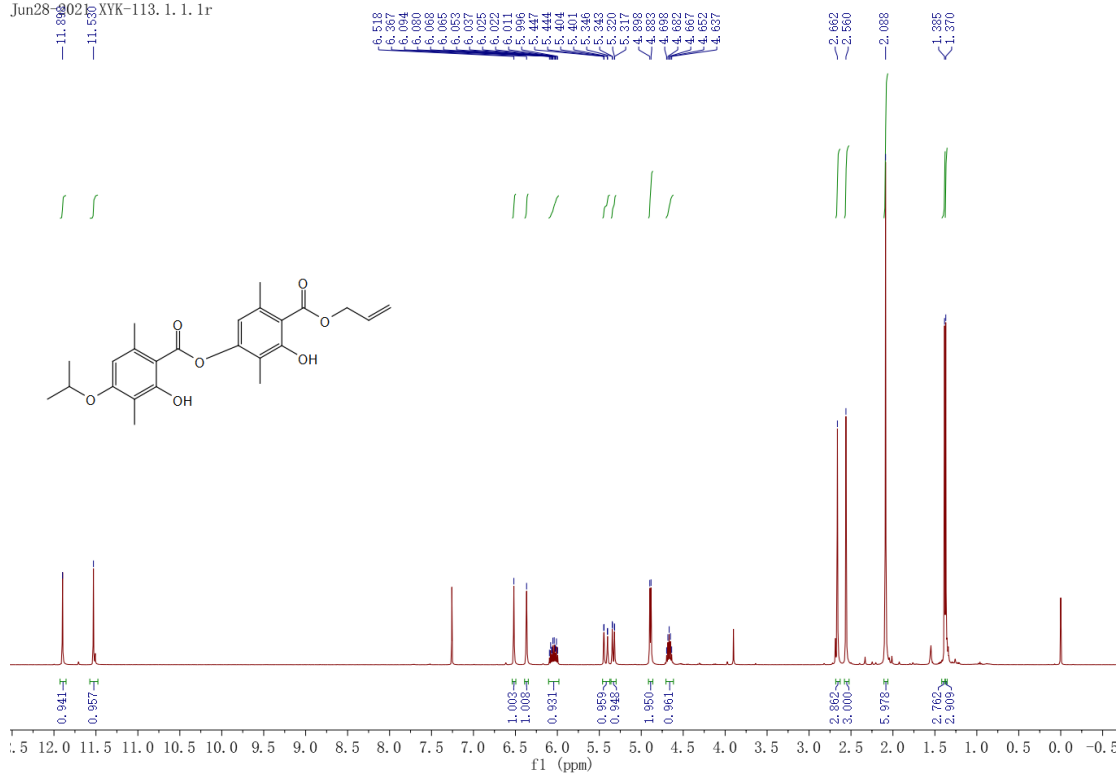

Figure S77. <sup>1</sup>H NMR spectrum of compound 6z

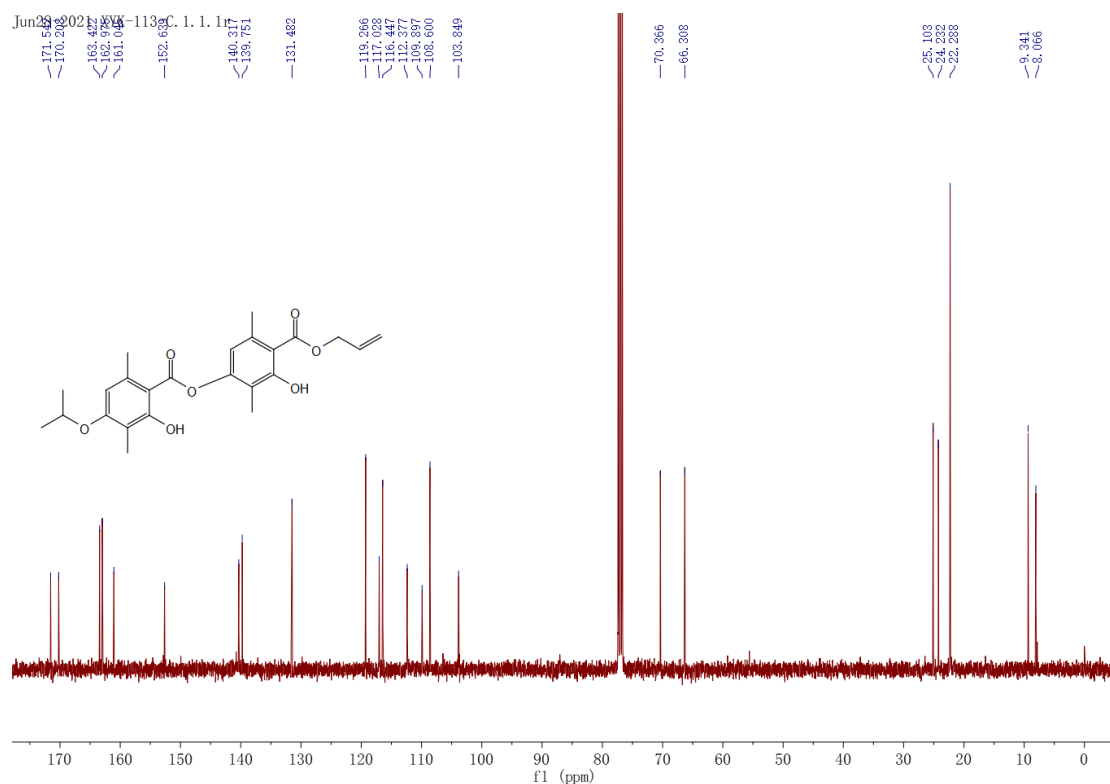

**Figure S78.**  $^{13}\text{C}$  NMR spectrum of compound **6z**

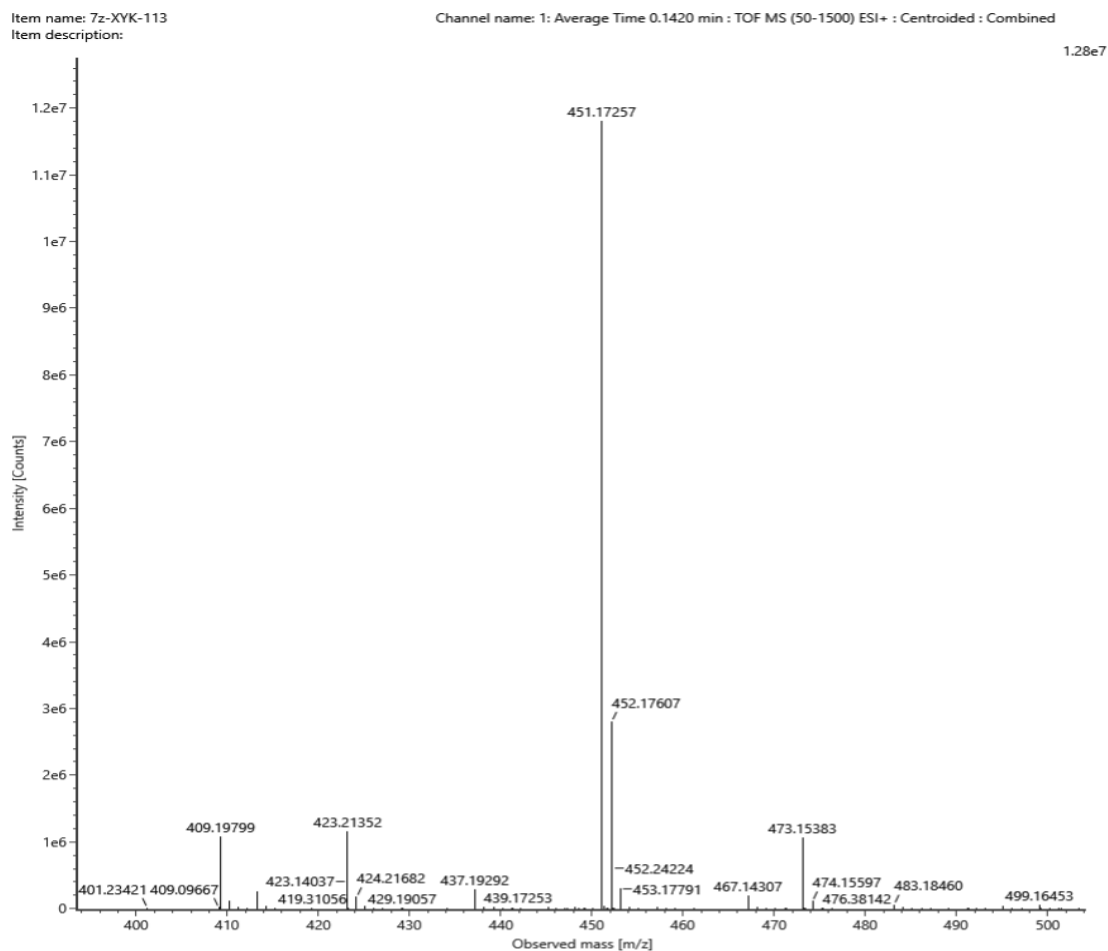

**Figure S79.** HRMS spectrum of compound **6z**

Jul26-2021 XYK-118. 1. 1. 1r

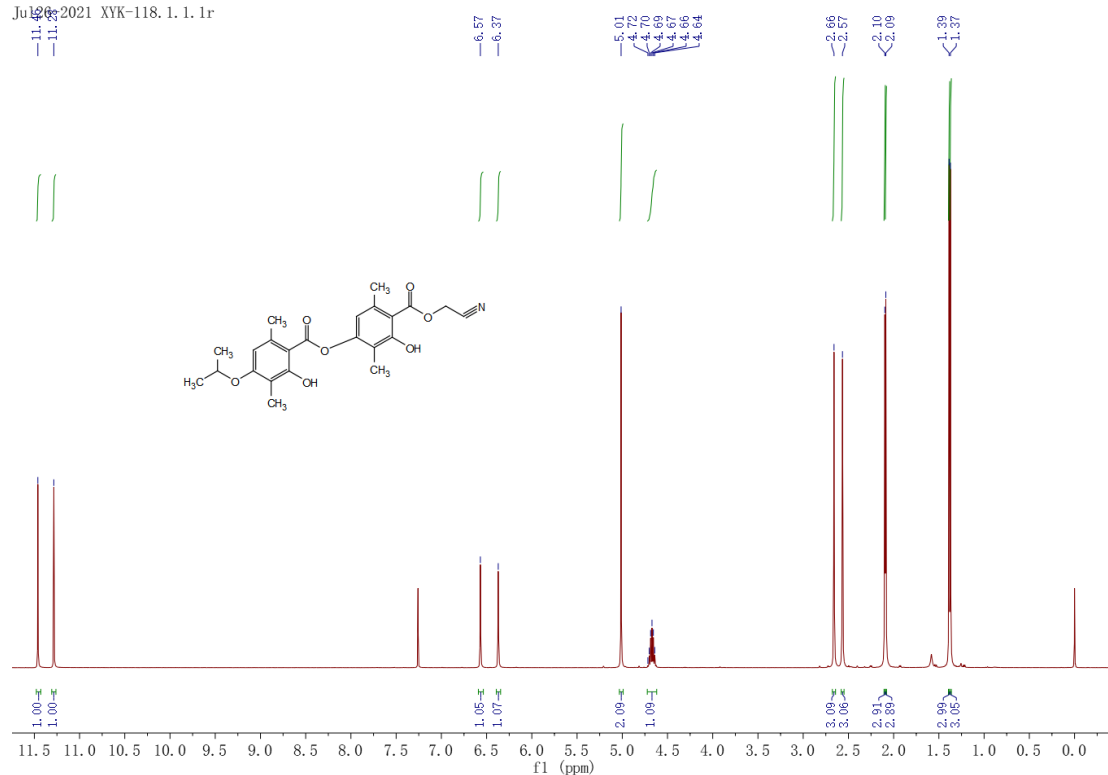

Figure S80. <sup>1</sup>H NMR spectrum of compound 6a'

Jul26-2021 XYK-118. 1. 1. 1r

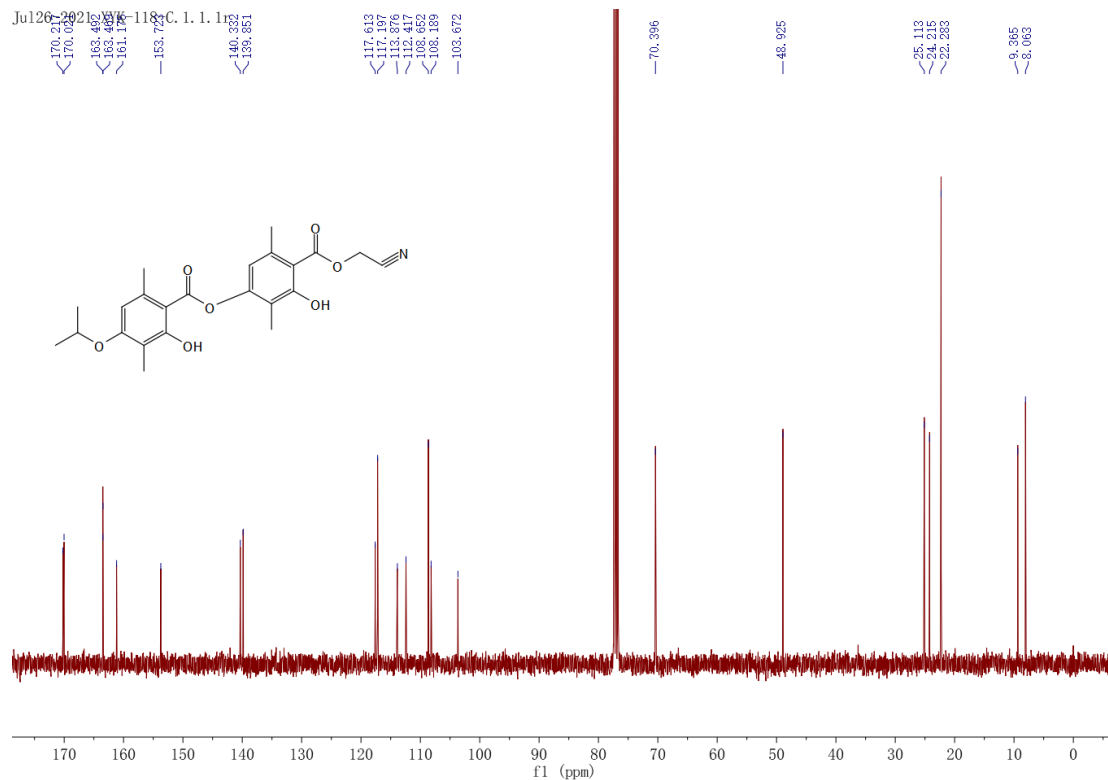

Figure S81. <sup>13</sup>C NMR spectrum of compound 6a'

Item name: 7A-XYK-118  
Item description:

Channel name: 1: Average Time 0.1217 min : TOF MS (50-1500) ESI+ : Centroided : Combined

2.35e6

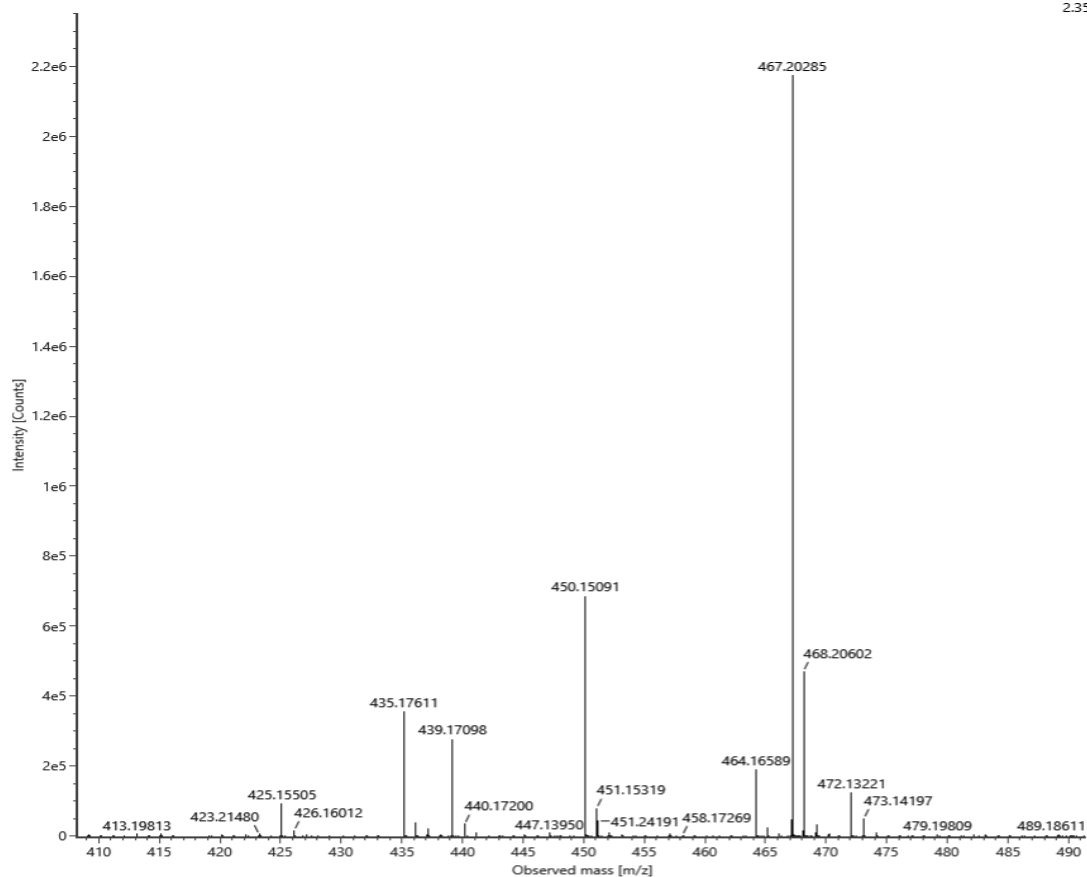

Figure S82. HRMS spectrum of compound 6a'

Jun 28 - 2021 XYK-114. 1. 1. 1r

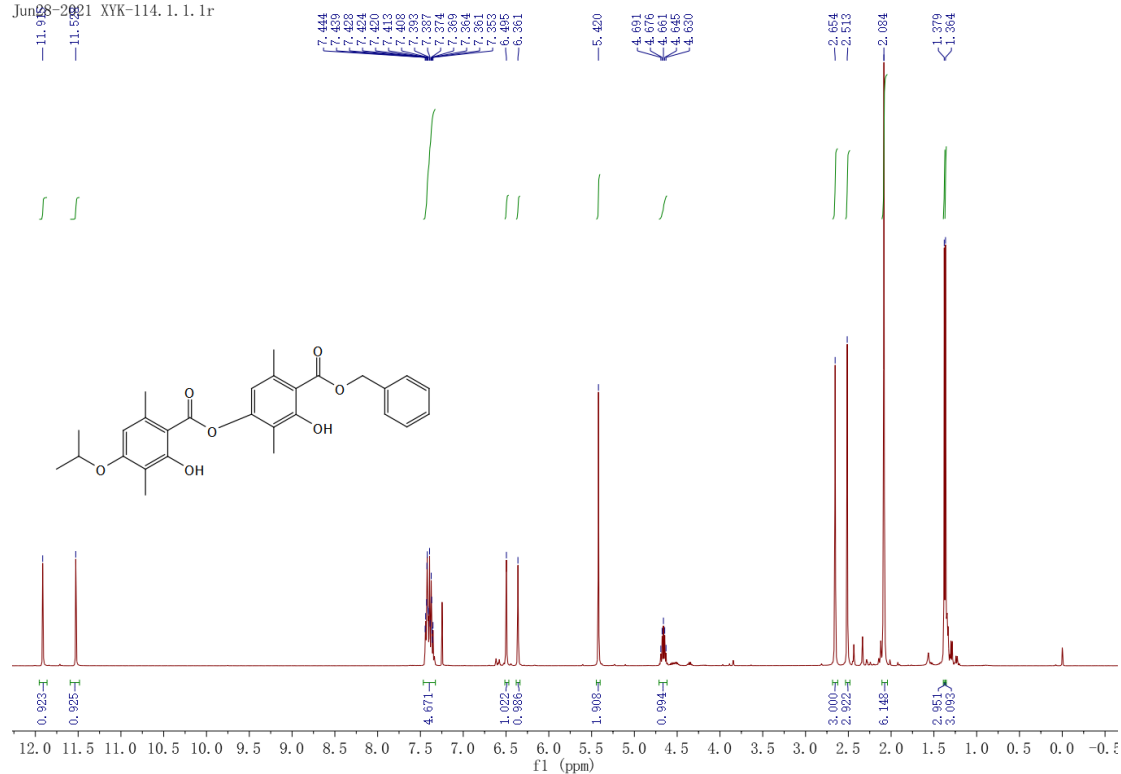

Figure S83. <sup>1</sup>H NMR spectrum of compound 6b'

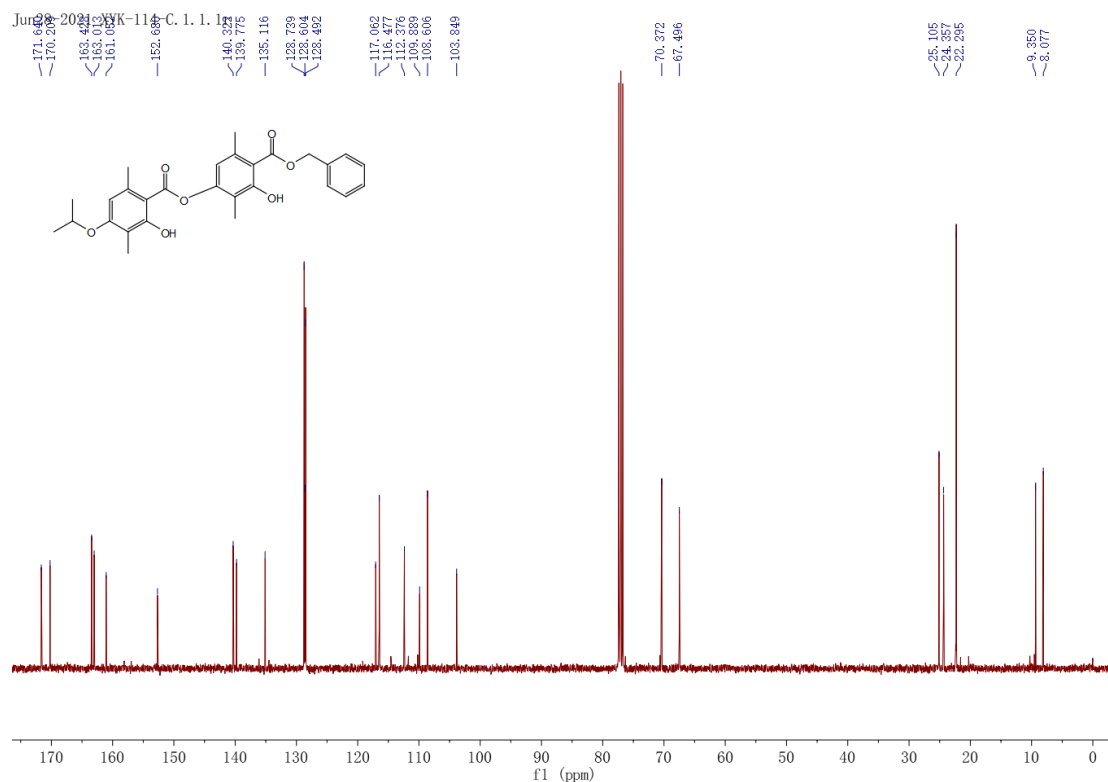

**Figure S84.**  $^{13}\text{C}$  NMR spectrum of compound **6b'**

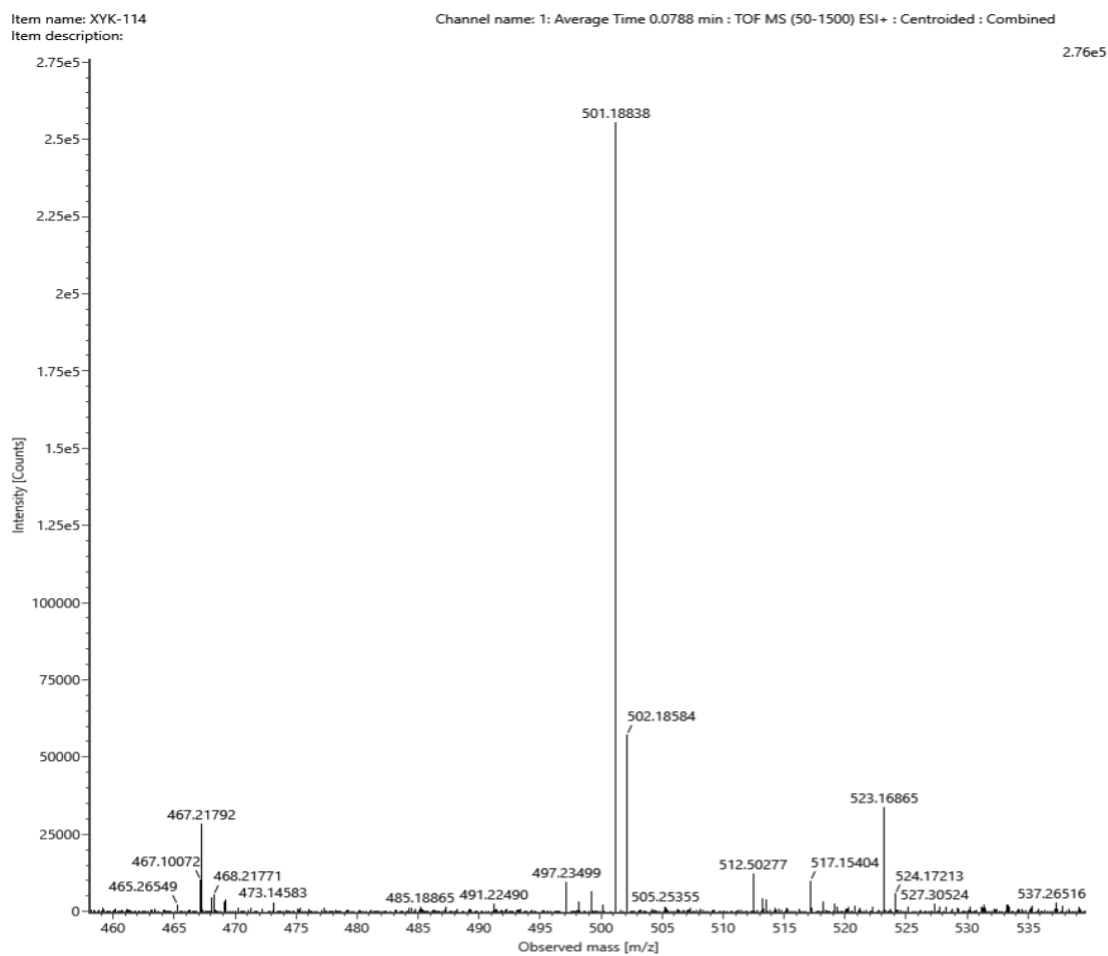

**Figure S85.** HRMS spectrum of compound **6b'**

Jan 18 2021 XYK-52-H. 1. 1. 1r

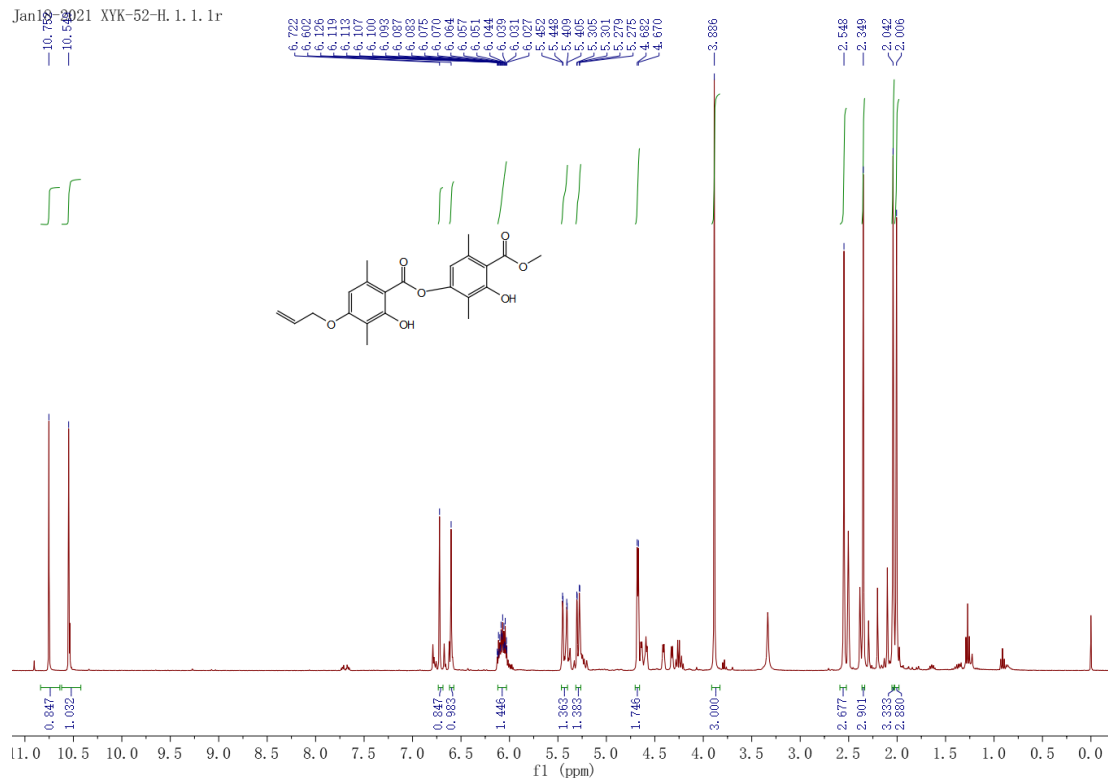

Figure S86. <sup>1</sup>H NMR spectrum of compound 6c'

Jan 18 2021 XYK-52-H. 1. 1. 1r

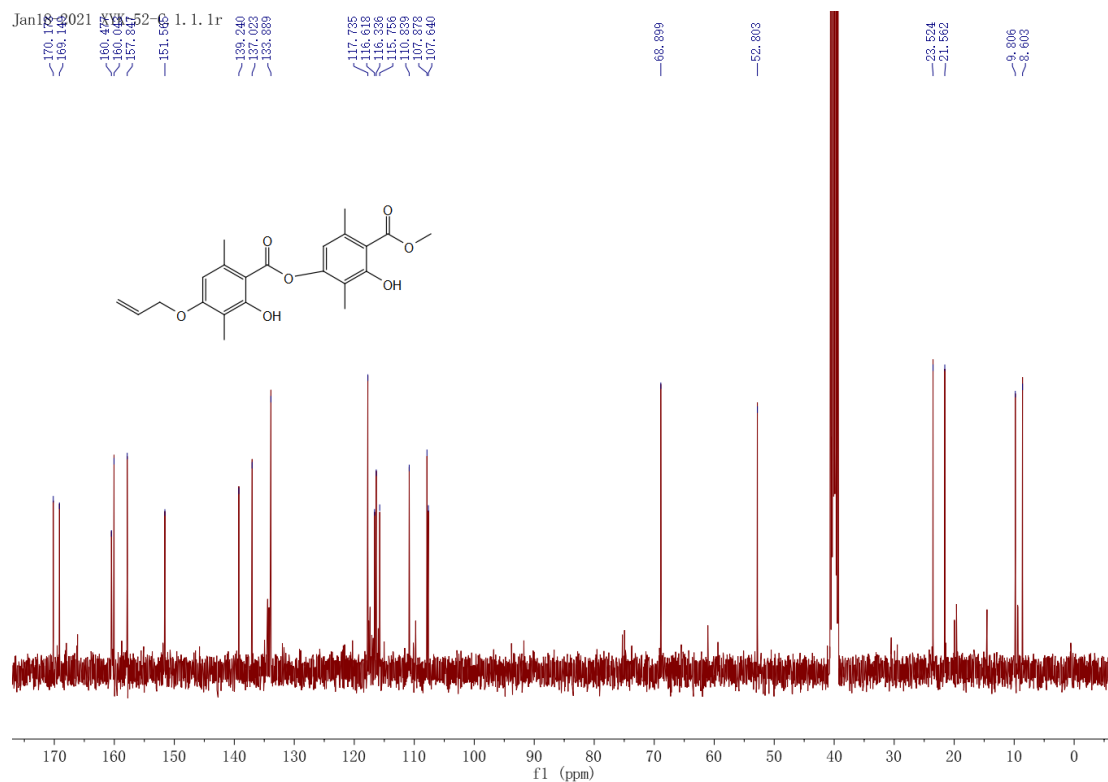

Figure S87. <sup>13</sup>C NMR spectrum of compound 6c'

Item name: 7C-XYK-52  
Item description:

Channel name: 1: Average Time 0.1174 min : TOF MS (50-1500) ESI+ : Centroided : Combined

3.47e6

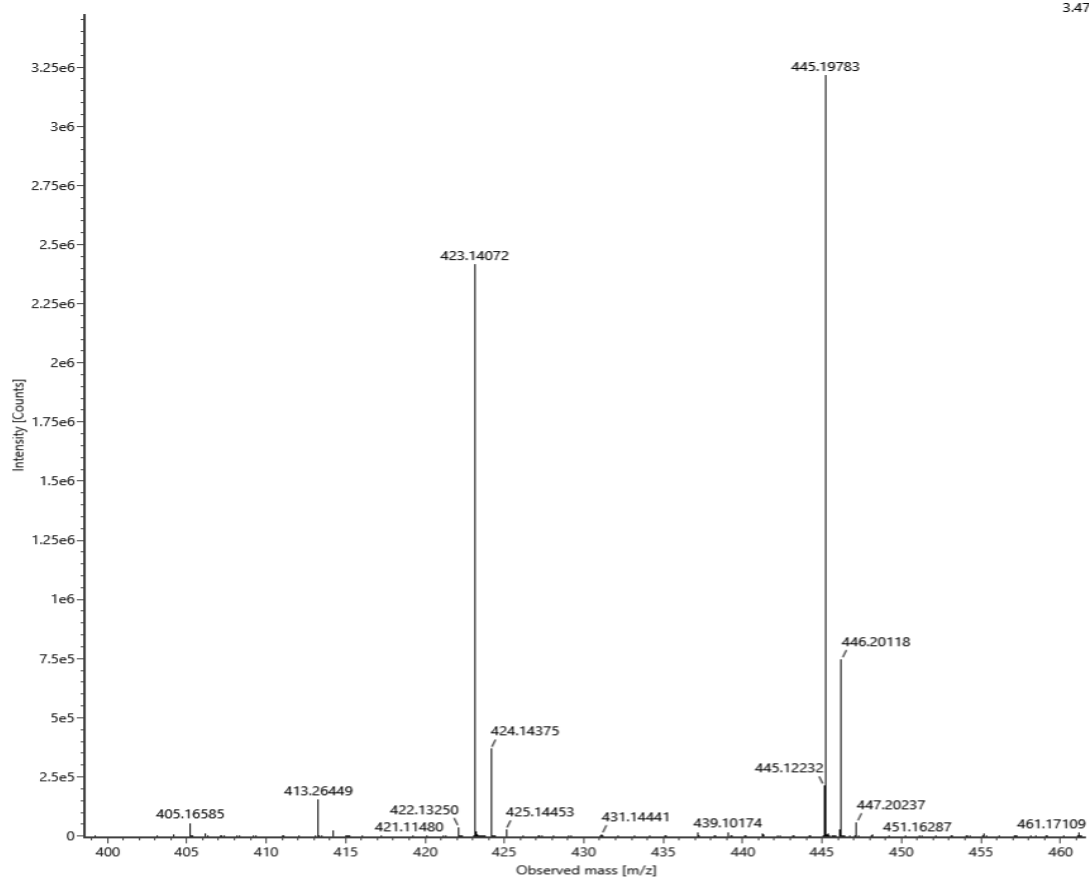

Figure S88. HRMS spectrum of compound 6c'

Jan 18, 2021 XYK-59-H. 1. 1. 1r

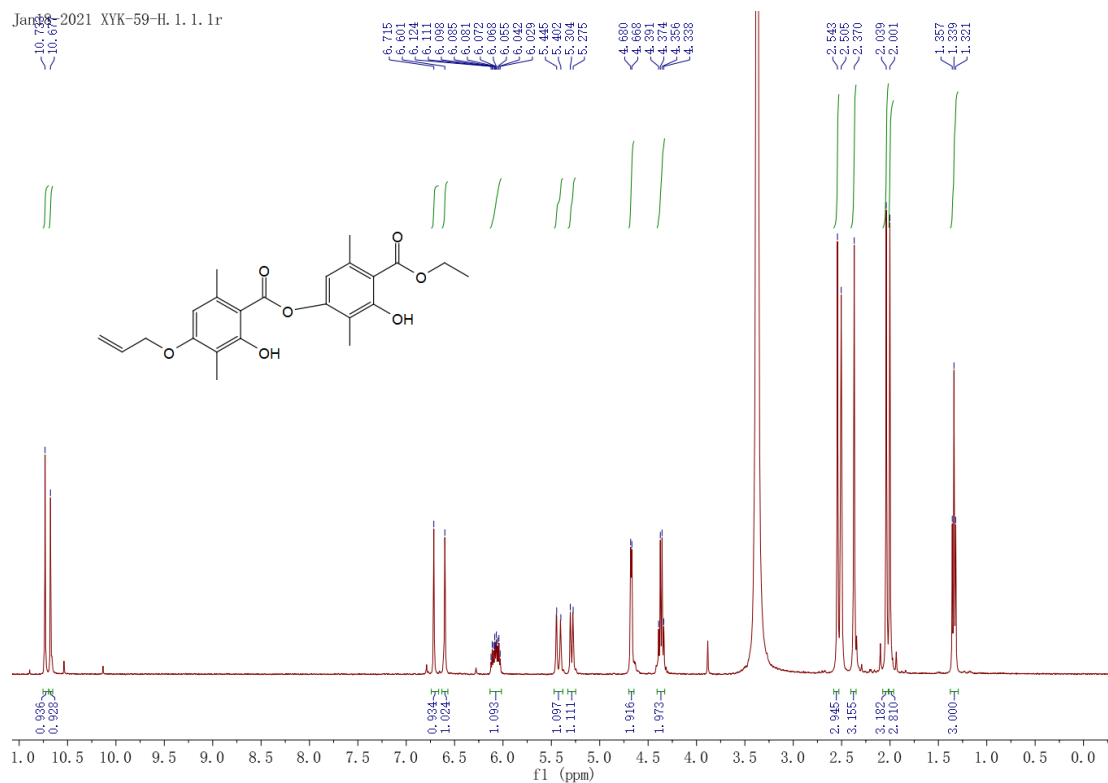

Figure S89. <sup>1</sup>H NMR spectrum of compound 6d'

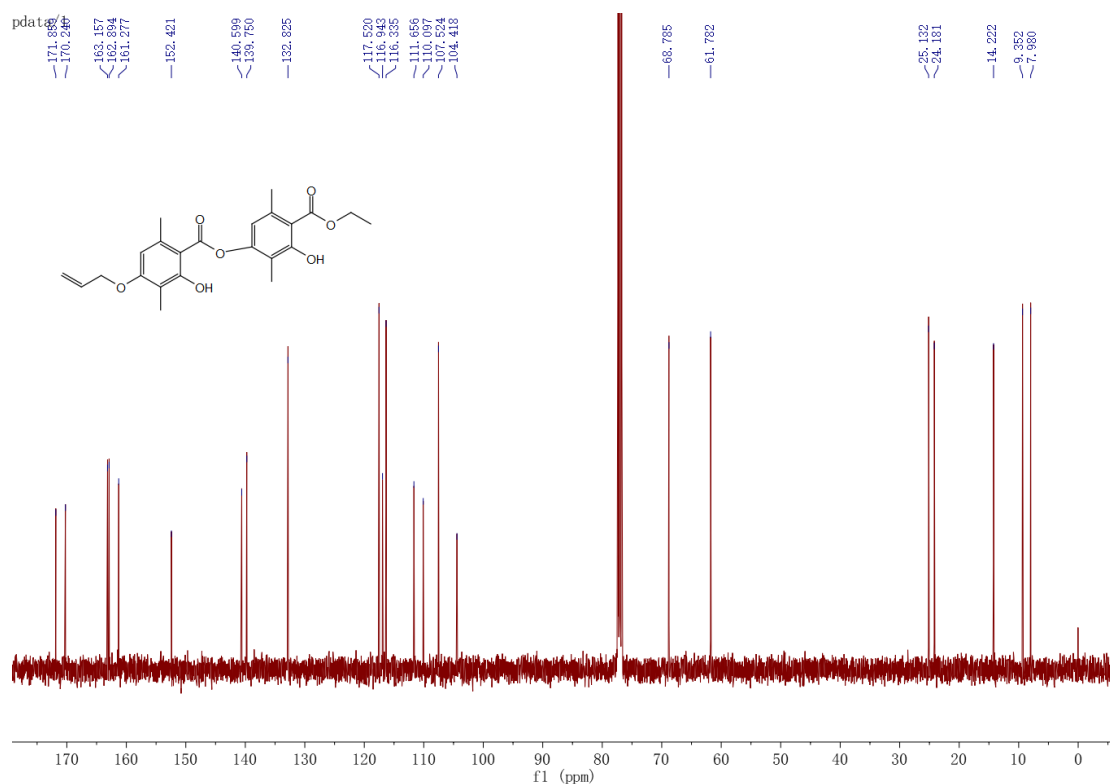

**Figure S90.**  $^{13}\text{C}$  NMR spectrum of compound **6d'**

Item name: 7D-XYK-59  
Item description:

Channel name: 1: Average Time 0.1217 min : TOF MS (50-1500) ESI+ : Centroided : Combined

9.92e6

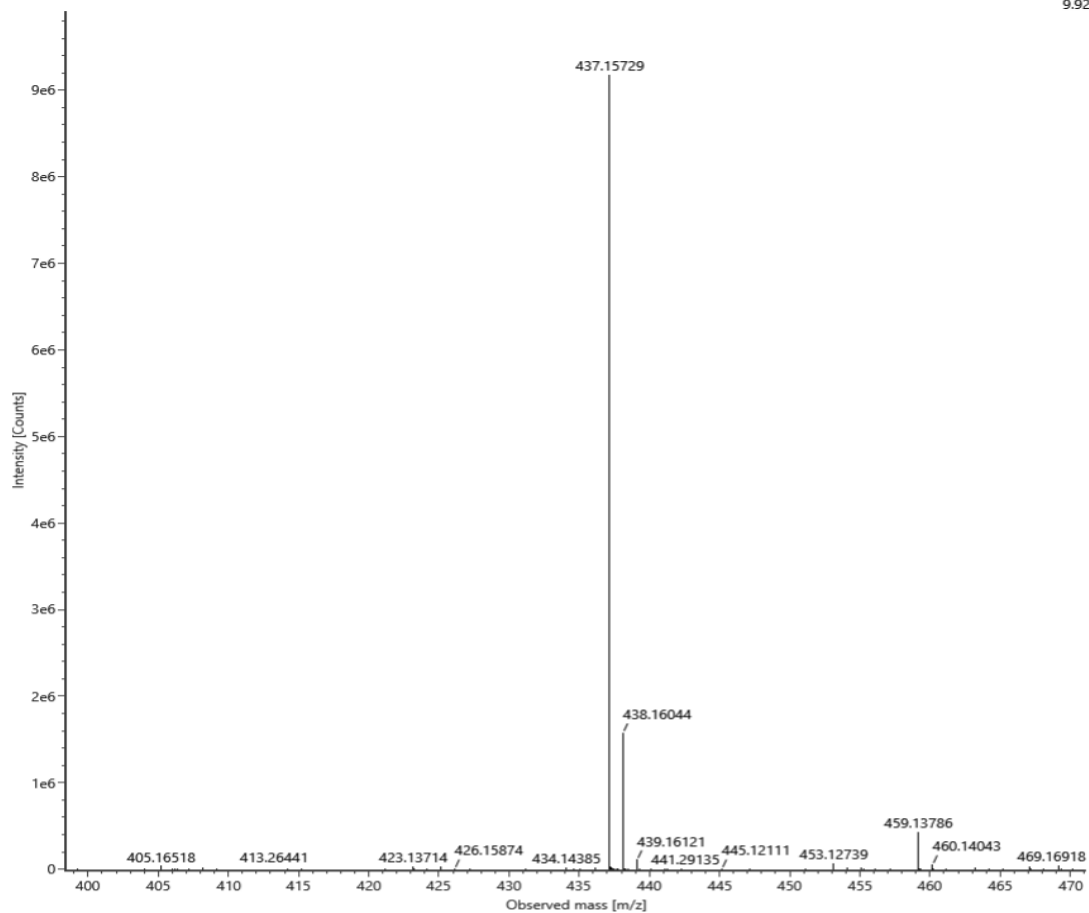

**Figure S91.** HRMS spectrum of compound **6d'**

May10-2021 XYK-98, 1. 1. 1r

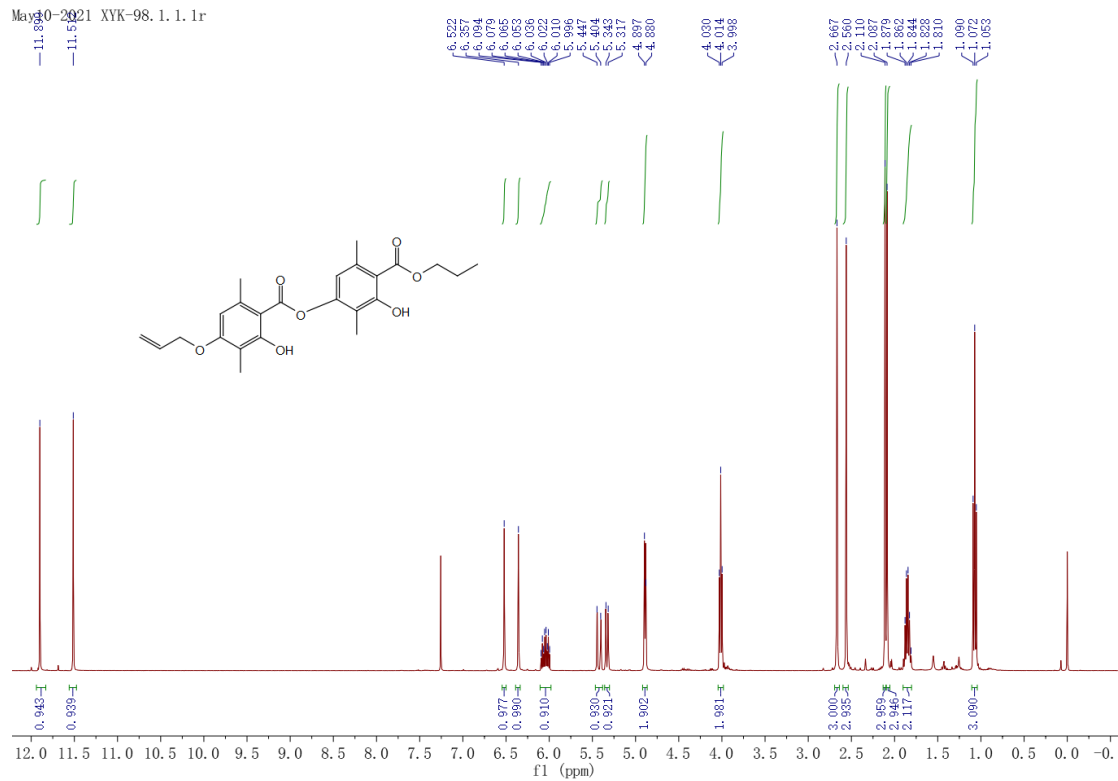

Figure S92. <sup>1</sup>H NMR spectrum of compound 6e'

May10-2021 XYK-98-C, 1. 1r

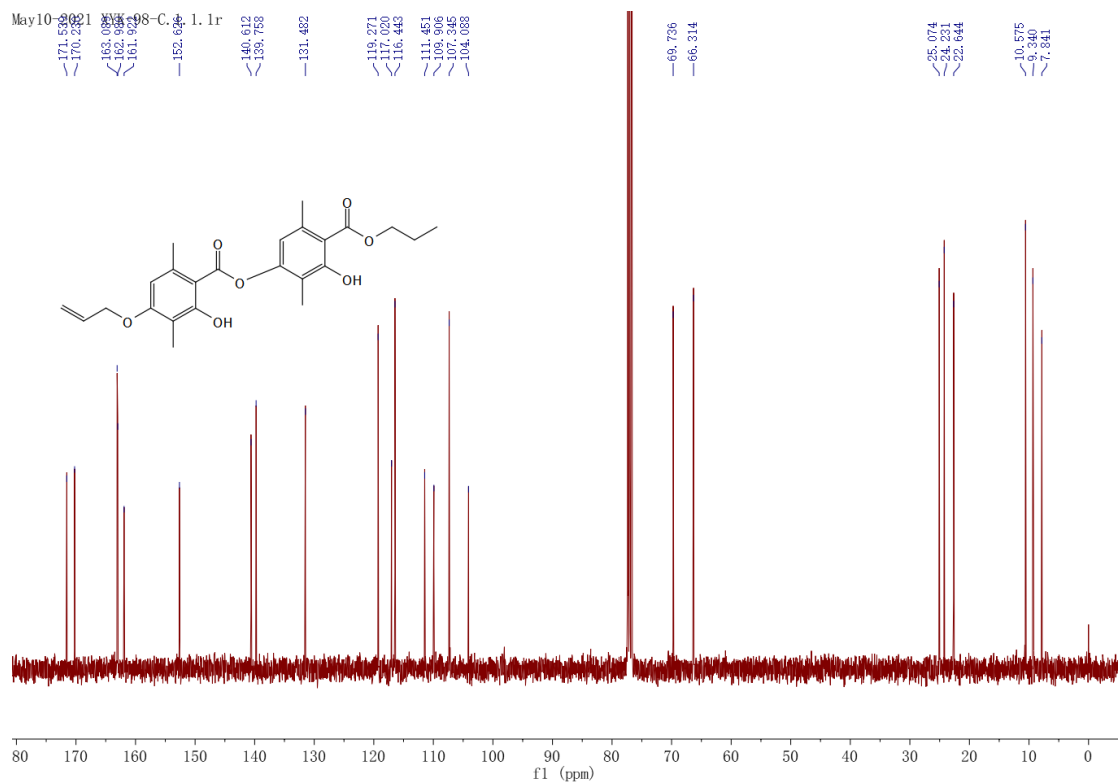

Figure S93. <sup>13</sup>C NMR spectrum of compound 6e'

Item name: 7E-XYK-98  
Item description:

Channel name: 1: Average Time 0.1634 min : TOF MS (50-1500) ESI+ : Centroided : Combined

1.47e7

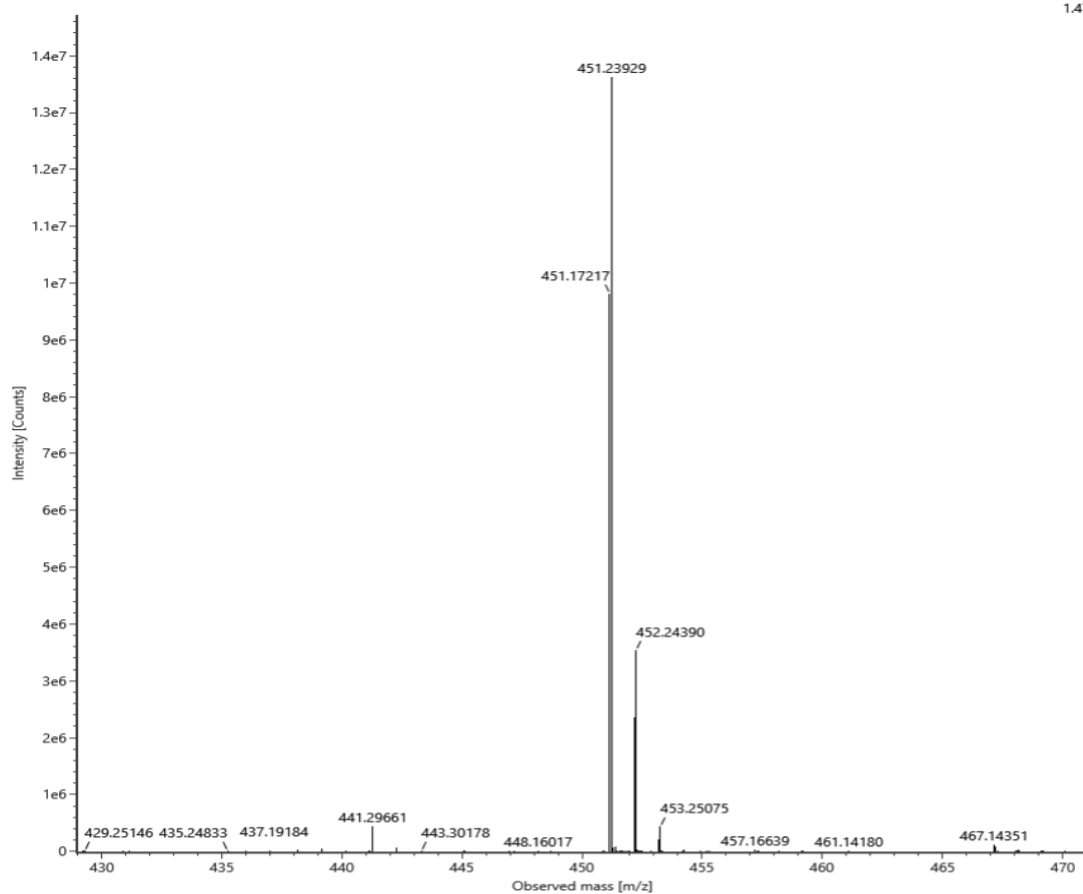

Figure S94. HRMS spectrum of compound 6e'

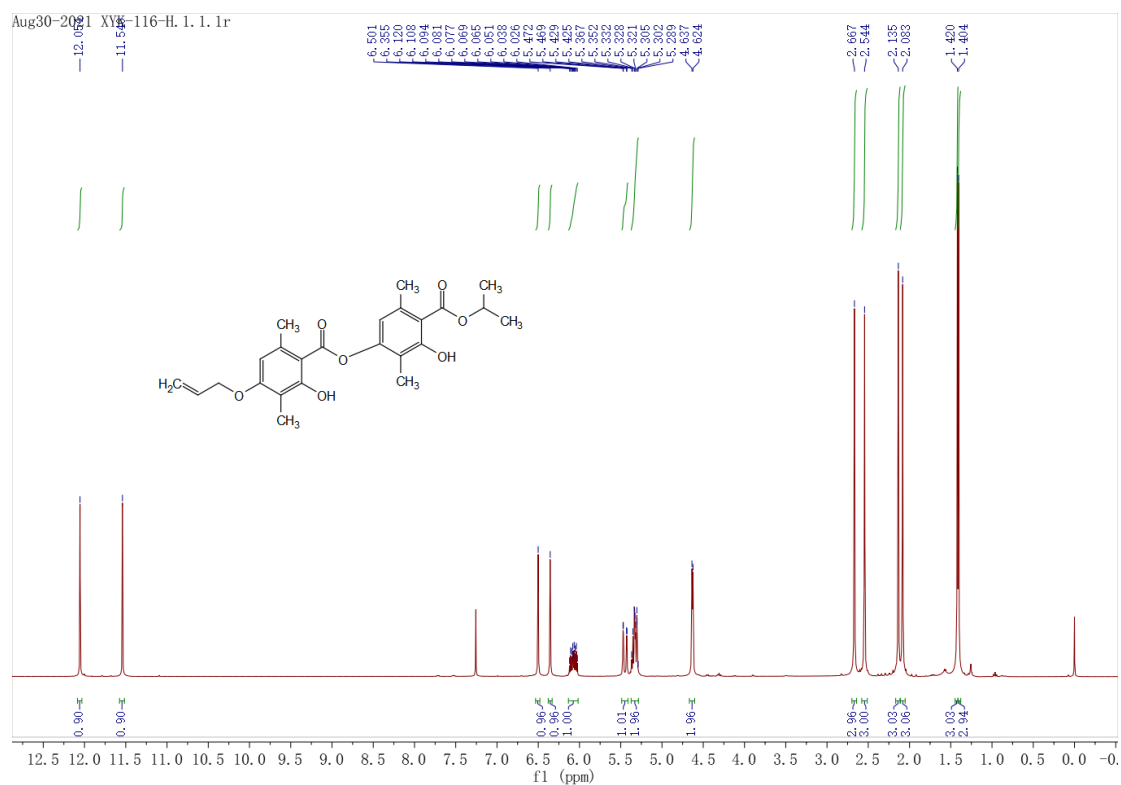

Figure S95. <sup>1</sup>H NMR spectrum of compound 6f'

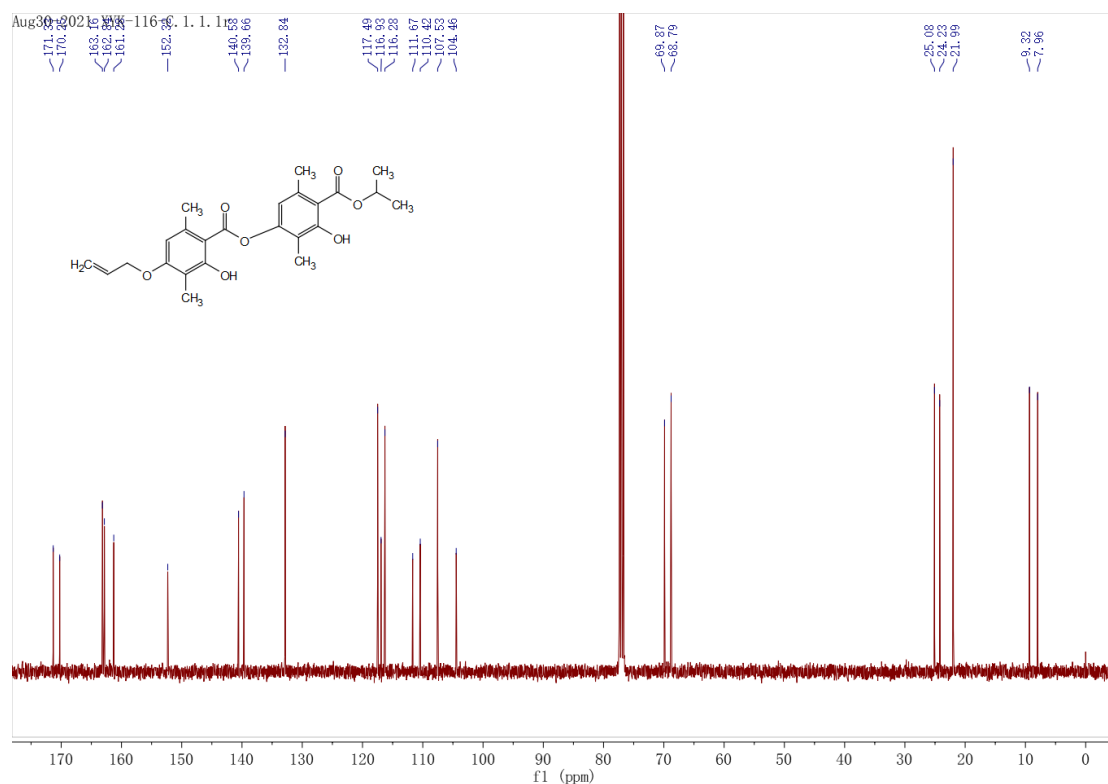

**Figure S96.**  $^{13}\text{C}$  NMR spectrum of compound **6f'**

Item name: 7F-XYK-116  
Item description:

Channel name: 1: Average Time 0.1174 min : TOF MS (50-1500) ESI+ : Centroided : Combined

1.03e7

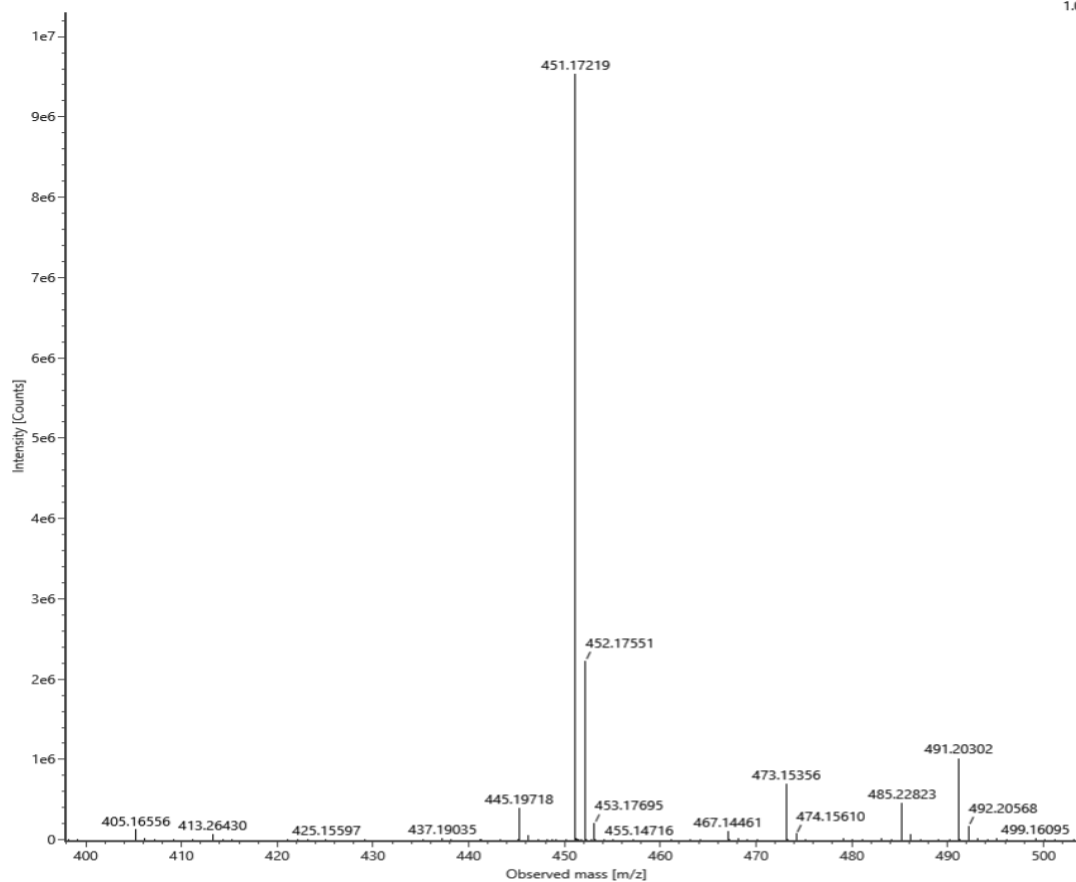

**Figure S97.** HRMS spectrum of compound **6f'**

Jan06-2021 XYK-55-H. 1. 1. 1r

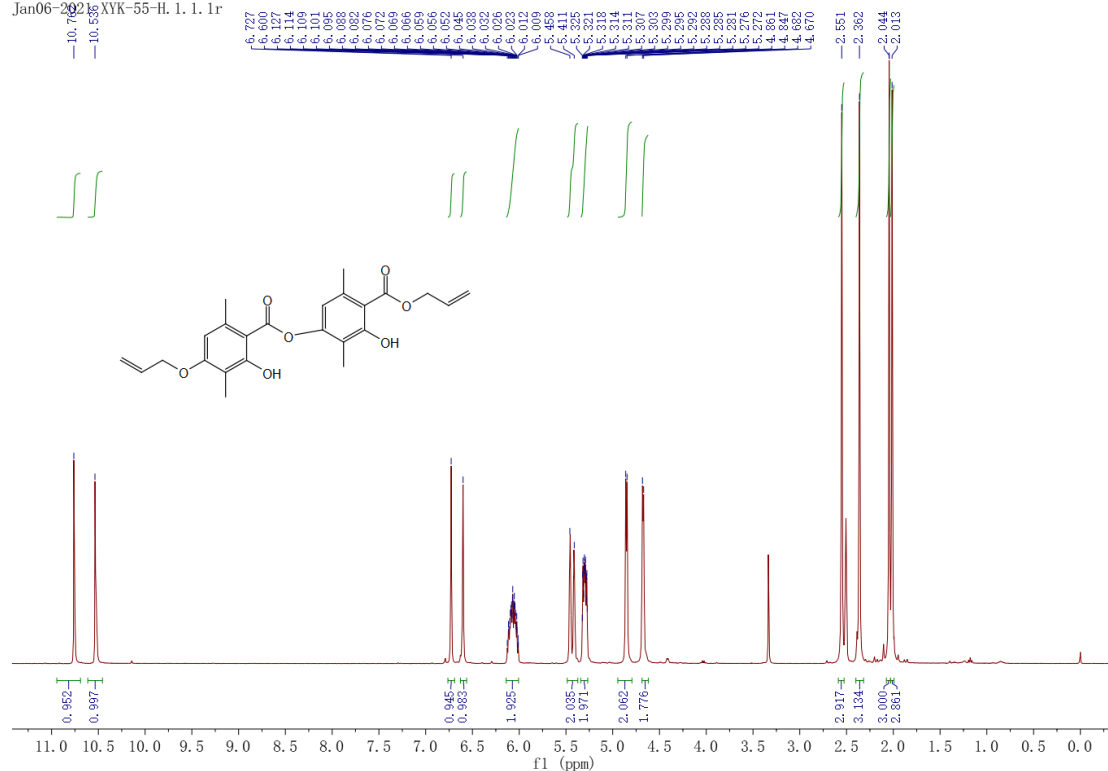

Figure S98. <sup>1</sup>H NMR spectrum of compound 6g'

Jan06-2021 XYK-55-H. 1. 1. 1r

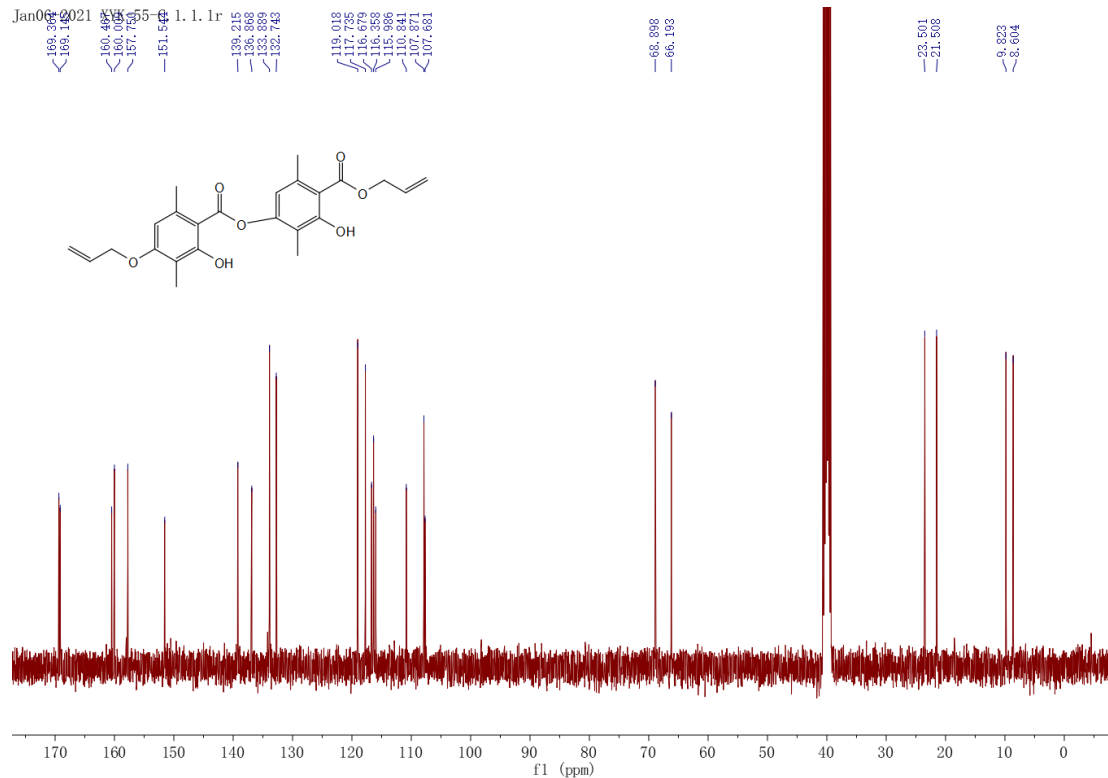

Figure S99. <sup>13</sup>C NMR spectrum of compound 6g'

Item name: 7G-XYK-55  
Item description:

Channel name: 1: Average Time 0.1174 min : TOF MS (50-1500) ESI+ : Centroided : Combined

2.95e6

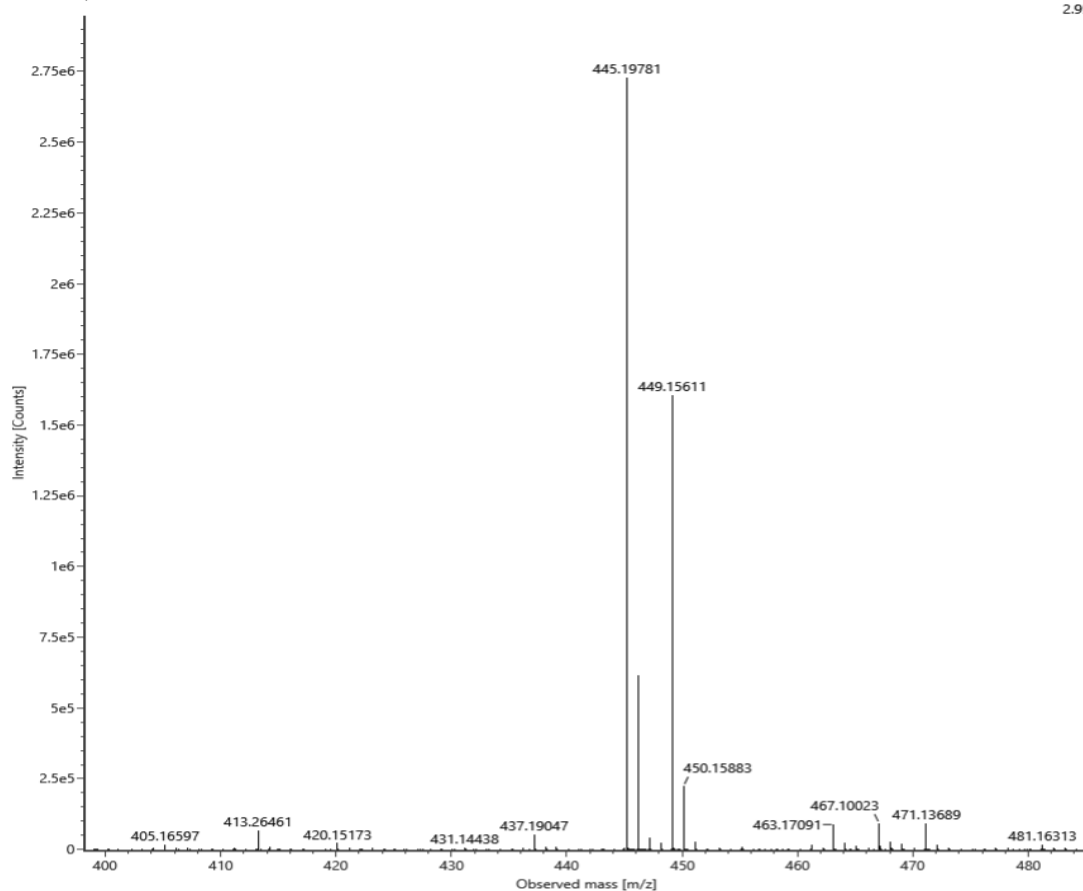

Figure S100. HRMS spectrum of compound 6g'

Apr07-2023, XYK-54, 1. 1. 1r

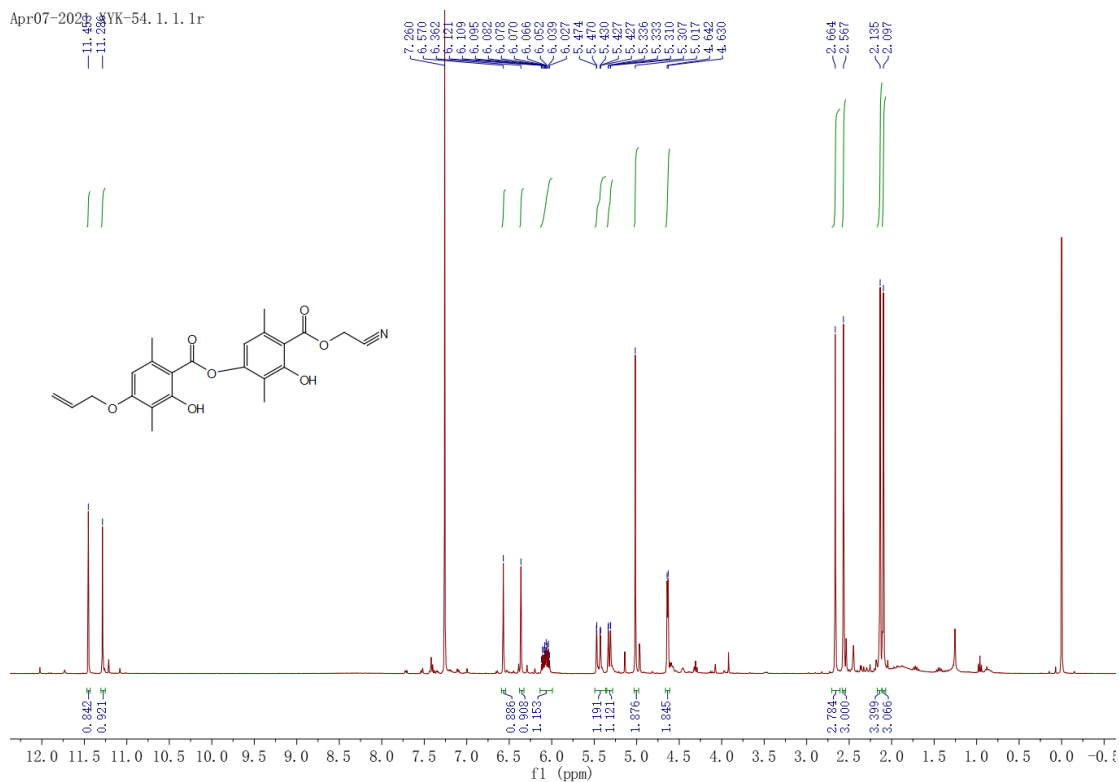

Figure S101. <sup>1</sup>H NMR spectrum of compound 6h'

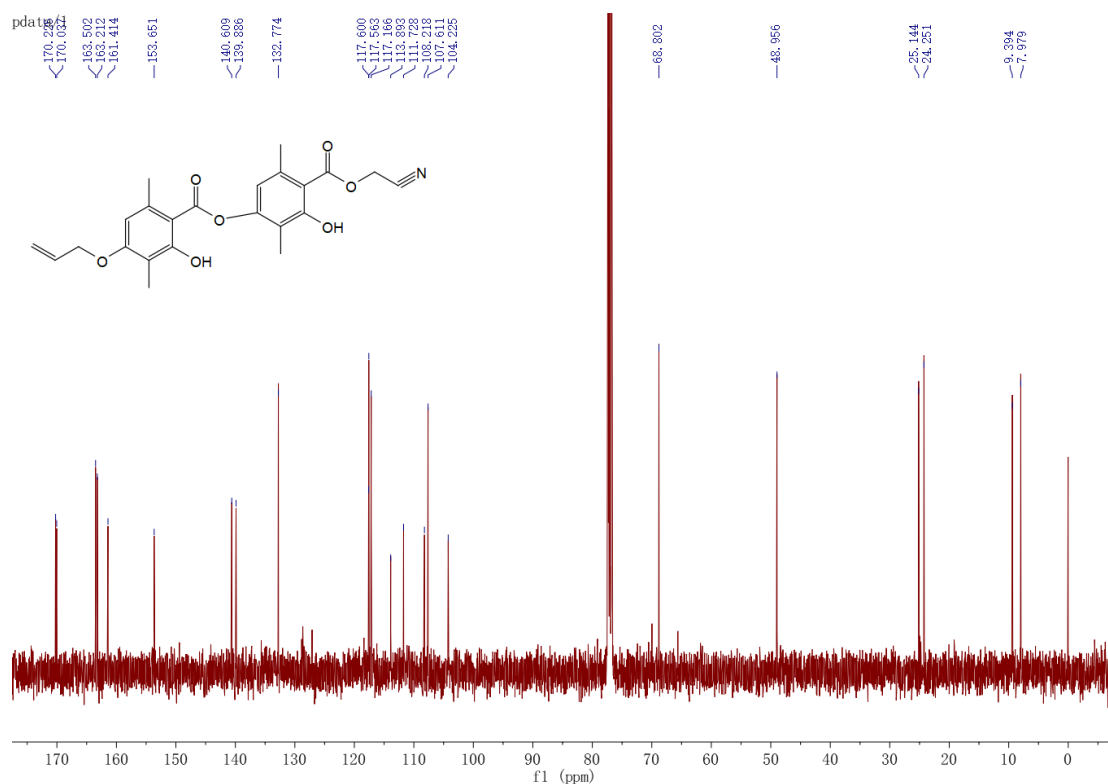

**Figure S102.**  $^{13}\text{C}$  NMR spectrum of compound **6h'**

Item name: 7H-XYK-54  
Item description:

Channel name: 1: Average Time 0.1174 min : TOF MS (50-1500) ESI+ : Centroided : Combined

3.08e6

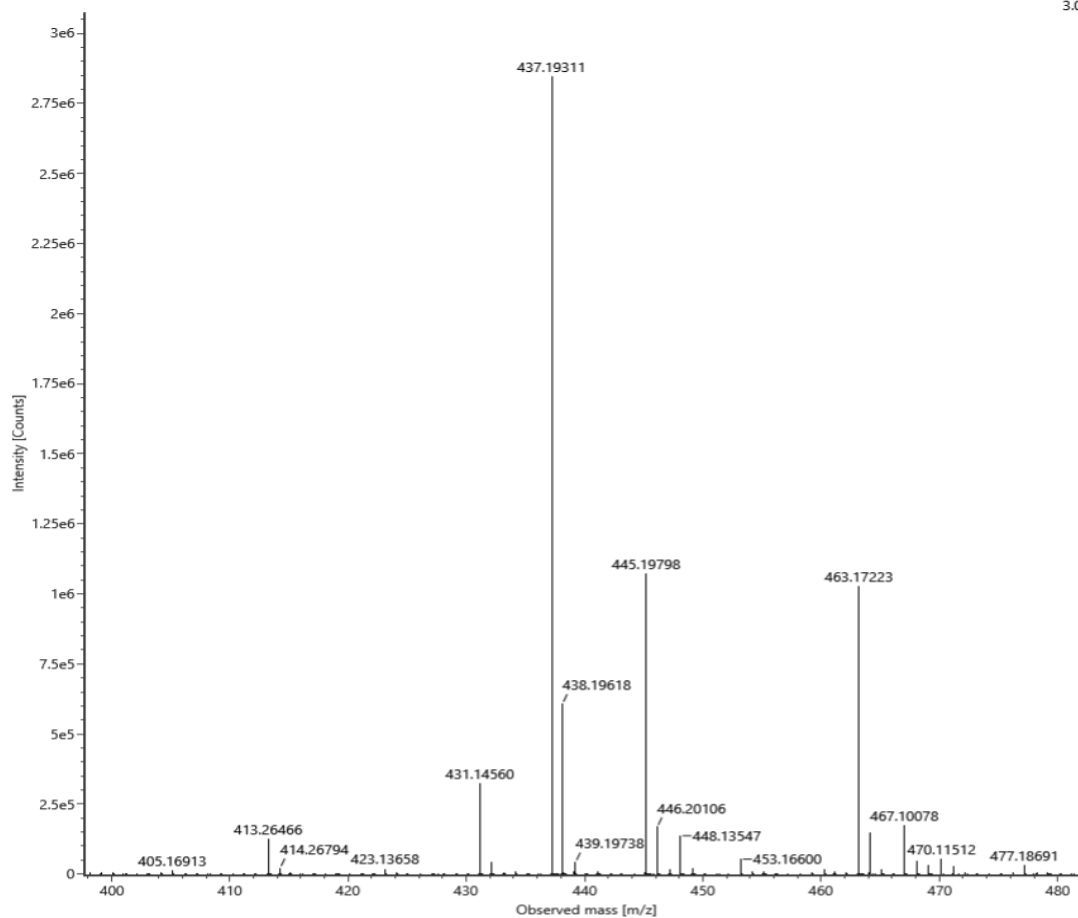

**Figure S103.** HRMS spectrum of compound **6h'**

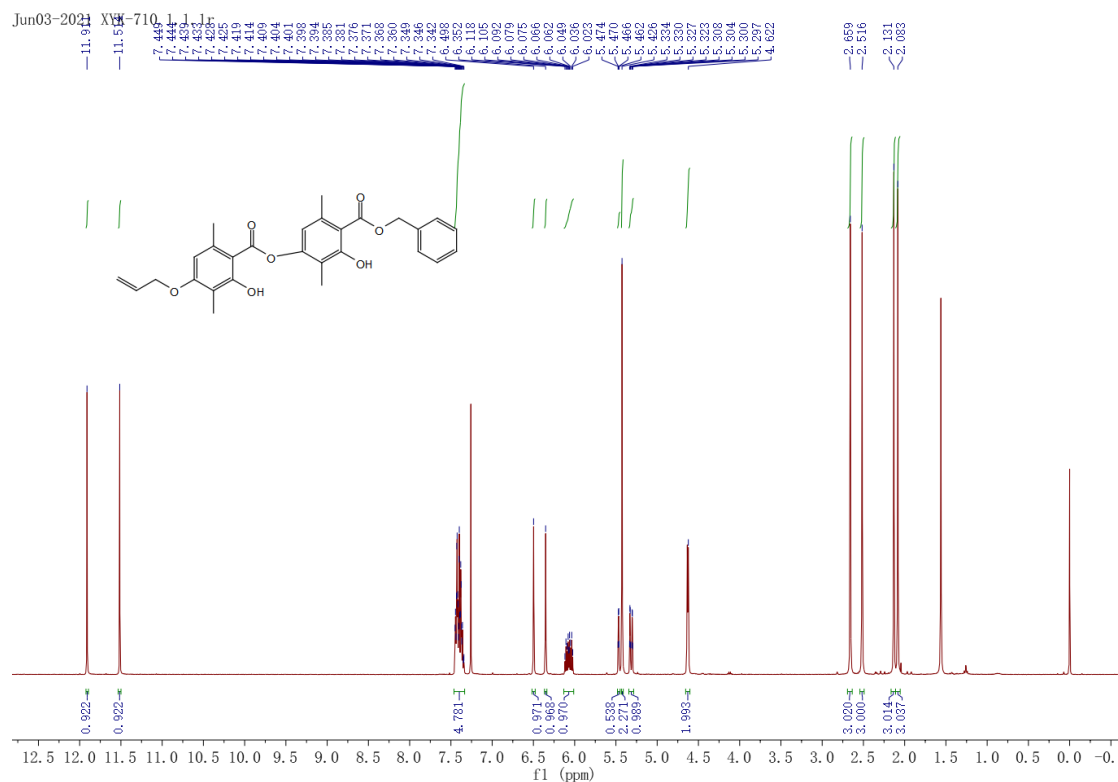

**Figure S104.** <sup>1</sup>H NMR spectrum of compound **6i'**

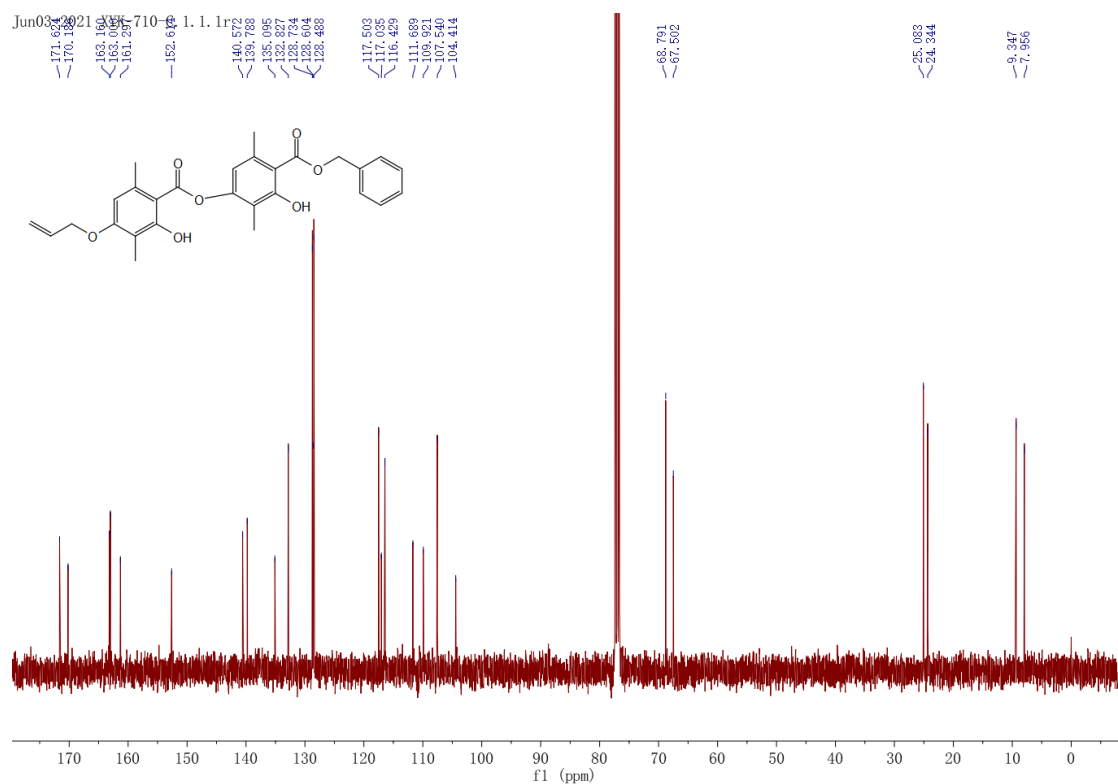

**Figure S105.** <sup>13</sup>C NMR spectrum of compound **6i'**

Item name: 71-XYK-71  
Item description:

Channel name: 1: Average Time 0.0788 min : TOF MS (50-1500) ESI+ : Centroided : Combined

8.98e5

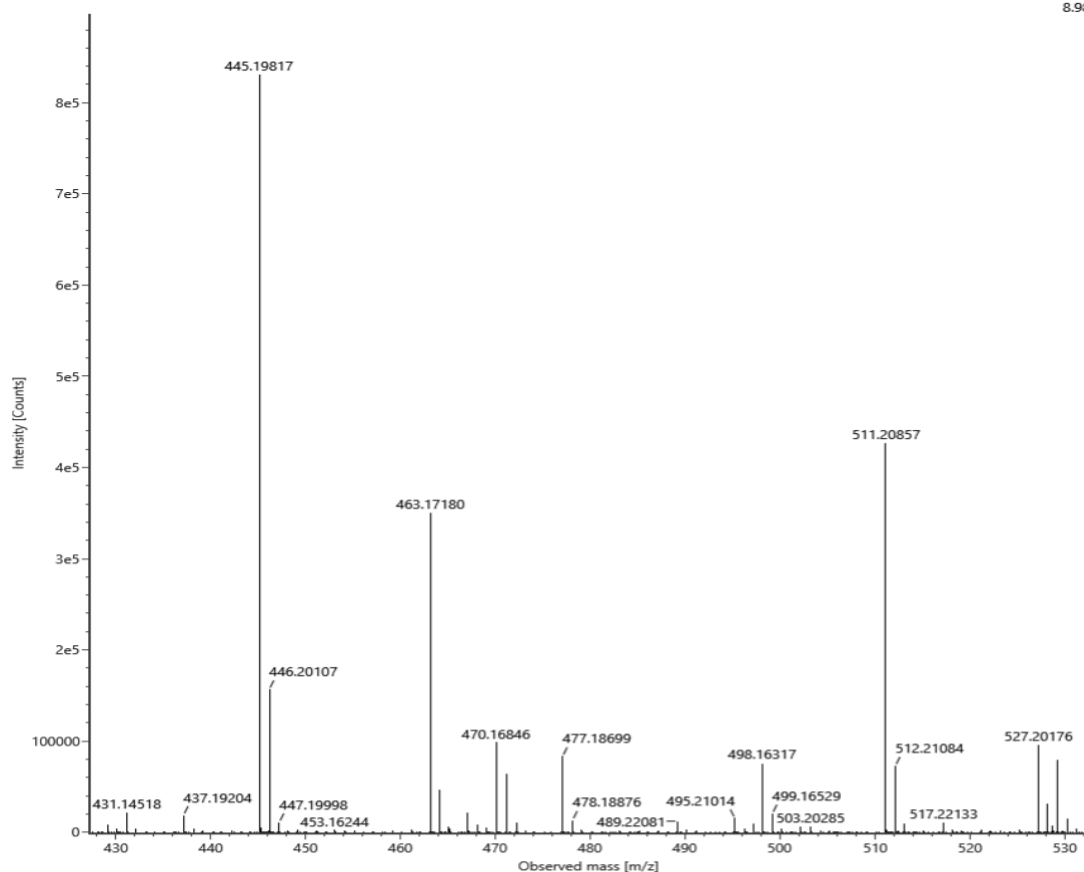

Figure S106. HRMS spectrum of compound 6i

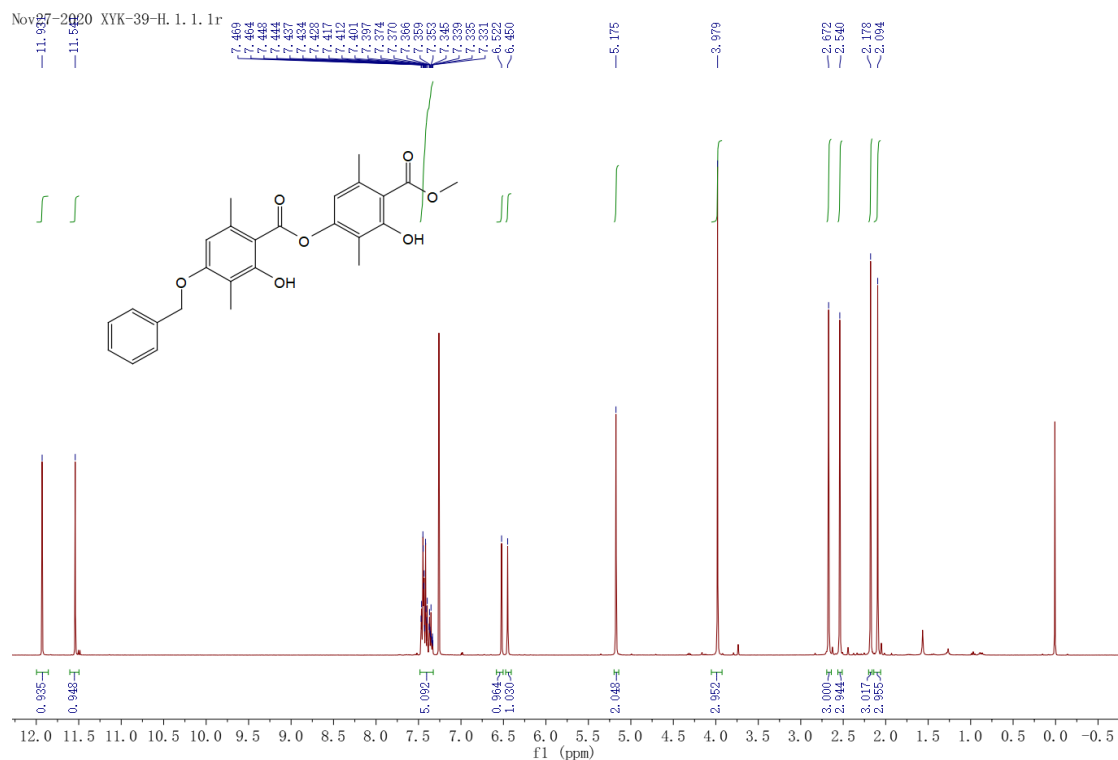

Figure S107. <sup>1</sup>H NMR spectrum of compound 6j

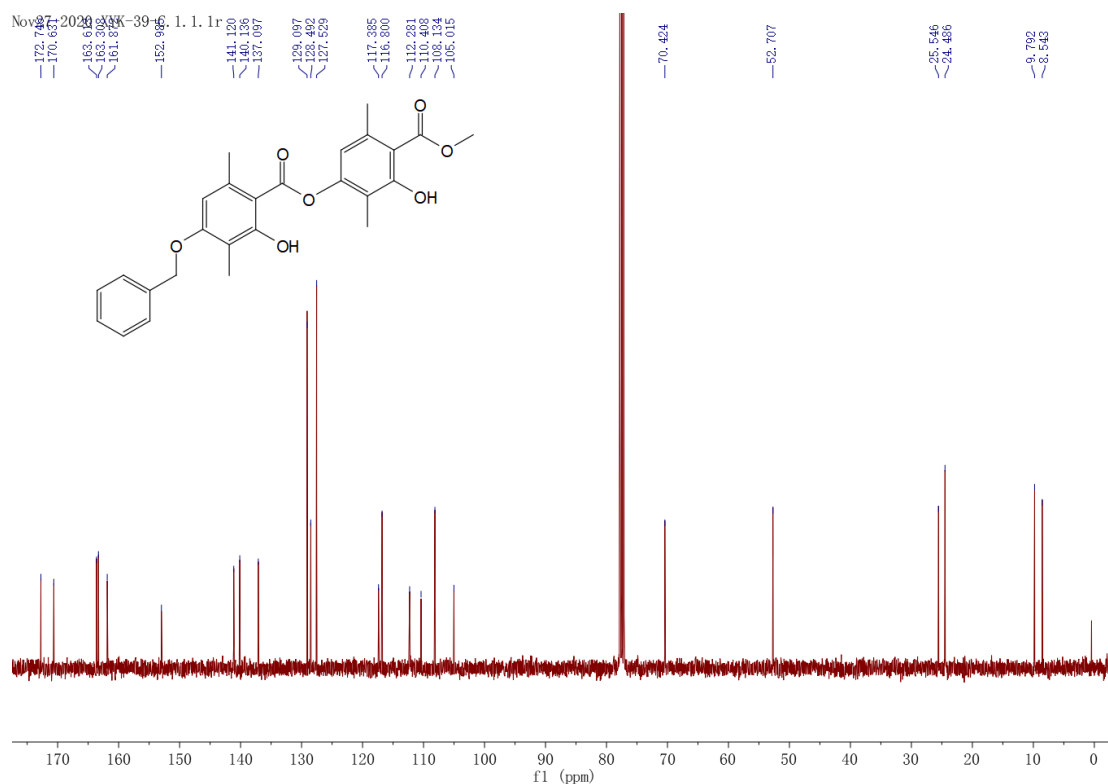

**Figure S108.**  $^{13}\text{C}$  NMR spectrum of compound **6j'**

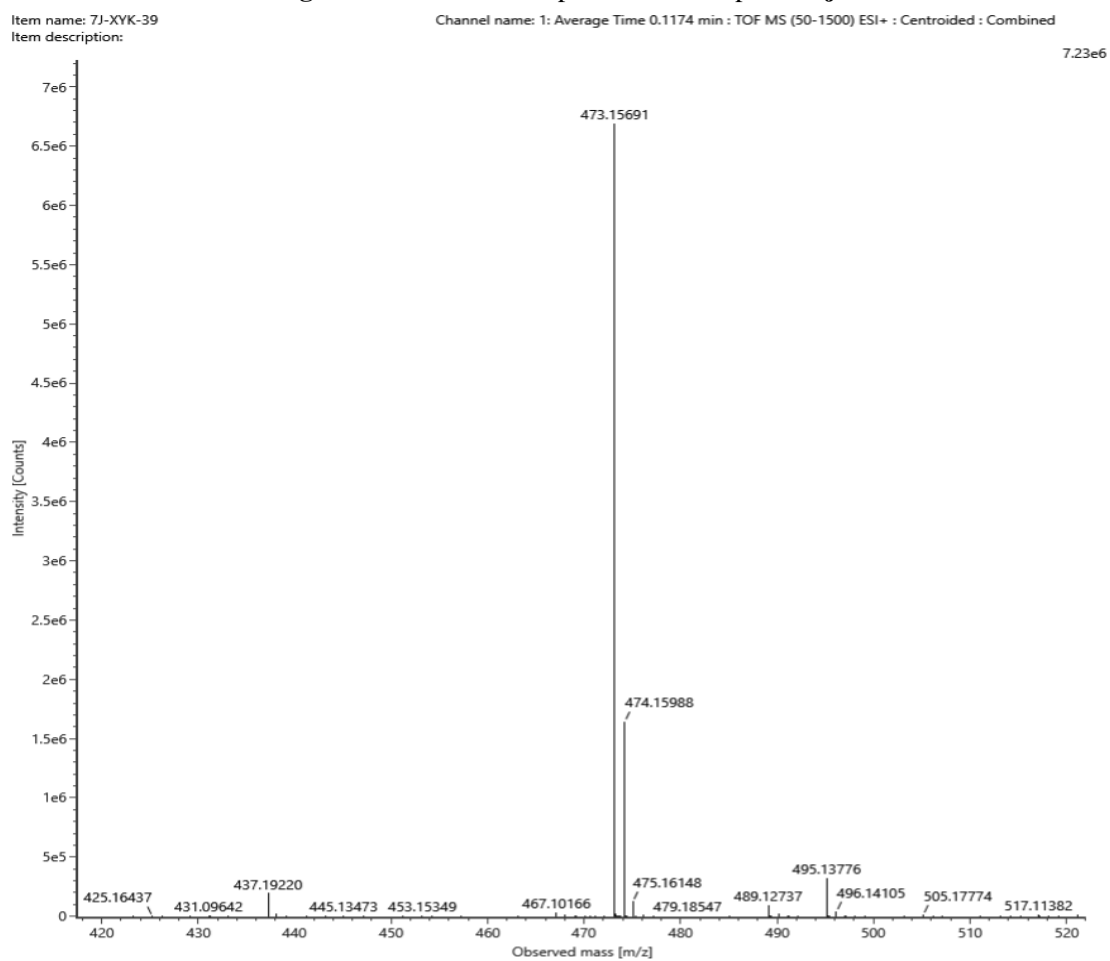

**Figure S109.** HRMS spectrum of compound **6j'**

May 10, 2021, XYK-58, 1. 1. 1r

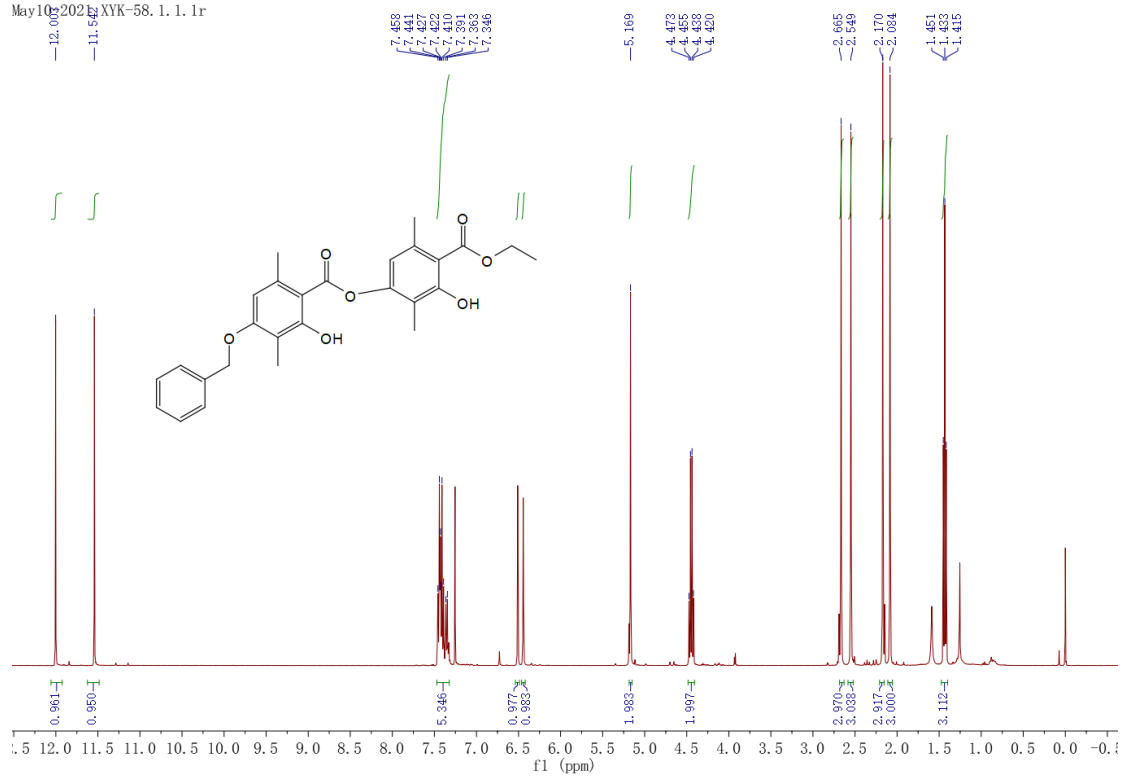

Figure S110. <sup>1</sup>H NMR spectrum of compound **6k'**

May 10, 2021, XYK-58-Cel, 1. 1. 1r

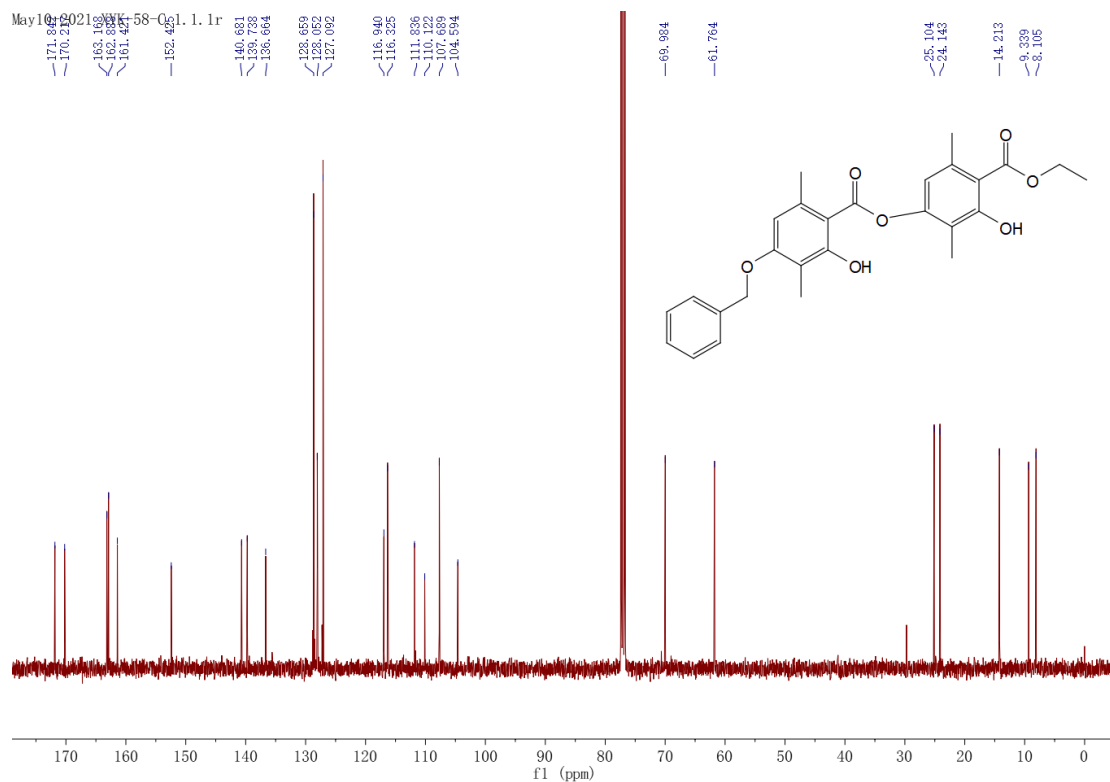

Figure S111. <sup>13</sup>C NMR spectrum of compound **6k'**

Channel name: 1: Average Time 0.1174 min : TOF MS (50-1500) ESI+ : Centroided : Combined

Mass spectrum of compound 10. The x-axis represents the observed mass in m/z, ranging from 440 to 540. The y-axis represents the intensity in counts, ranging from 0 to 4.5e6. The base peak is at m/z 487.17217. Other labeled peaks include m/z 438.19594, 453.16791, 467.10023, 484.18260, 488.17496, 489.17758, 503.14480, 509.15280, 519.19393, 531.13426, 536.16044, and 541.11934.

| Observed mass [m/z] | Intensity [Counts] |
|---------------------|--------------------|
| 438.19594           | ~10000             |
| 453.16791           | ~10000             |
| 467.10023           | ~10000             |
| 484.18260           | ~10000             |
| 487.17217           | ~4.5e6             |
| 488.17496           | ~1.1e6             |
| 489.17758           | ~20000             |
| 503.14480           | ~10000             |
| 509.15280           | ~10000             |
| 519.19393           | ~10000             |
| 531.13426           | ~10000             |
| 536.16044           | ~10000             |
| 541.11934           | ~20000             |

Jun03-2021-XYK-95. 1. 1. 1r

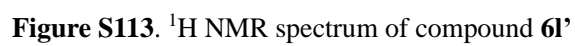

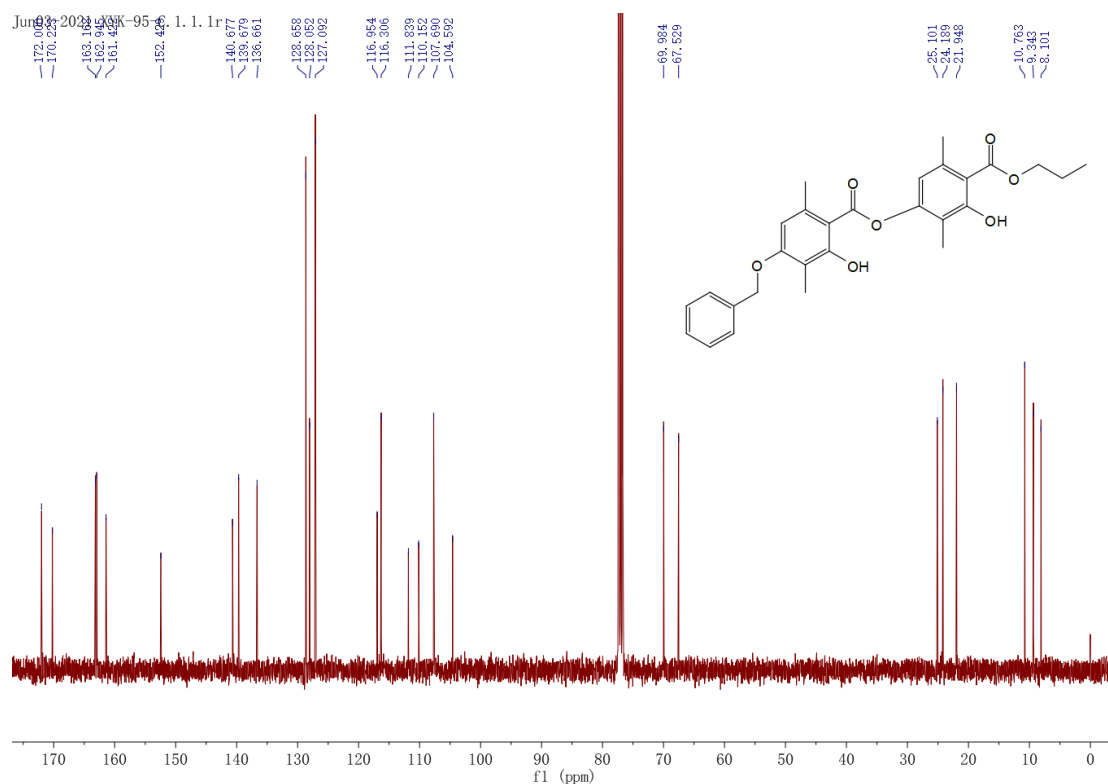

**Figure S114.** <sup>13</sup>C NMR spectrum of compound **6l'**

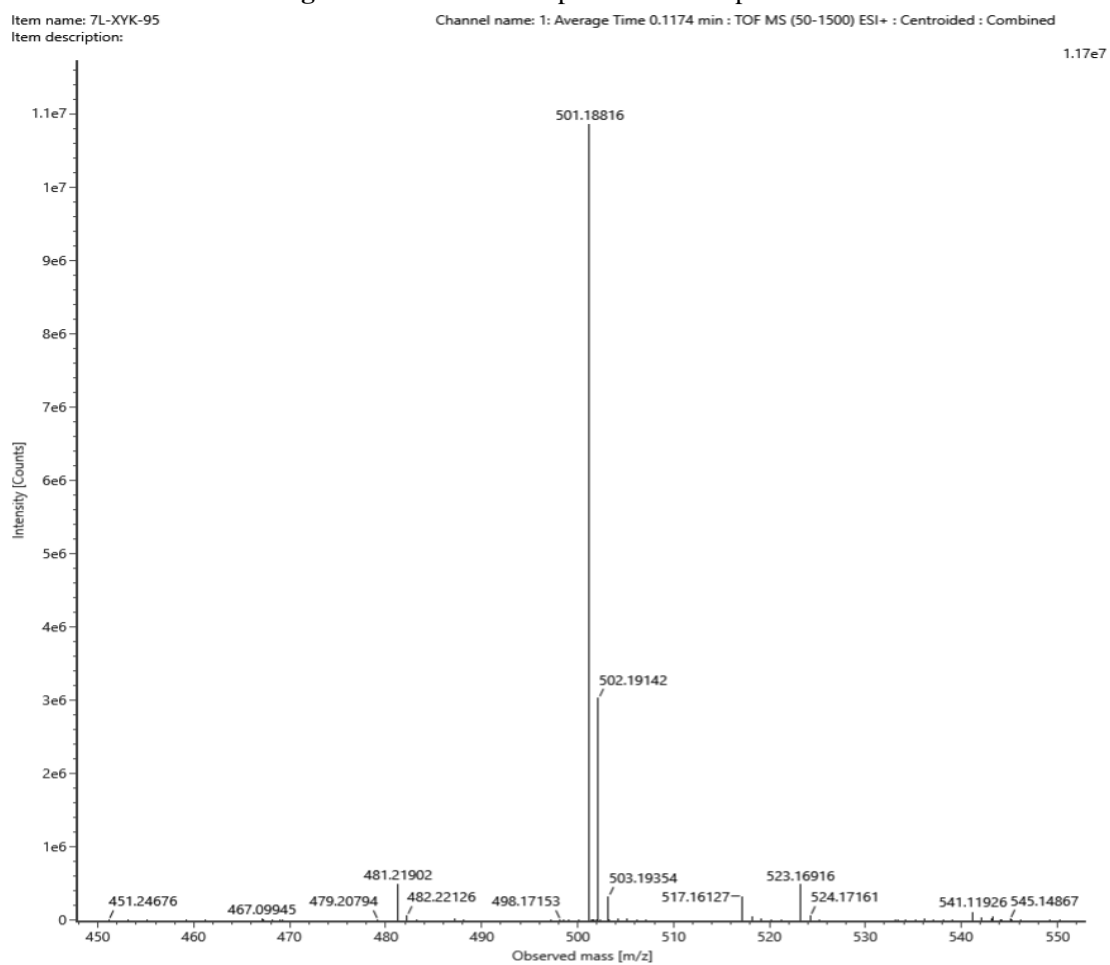

**Figure S115.** HRMS spectrum of compound **6l'**

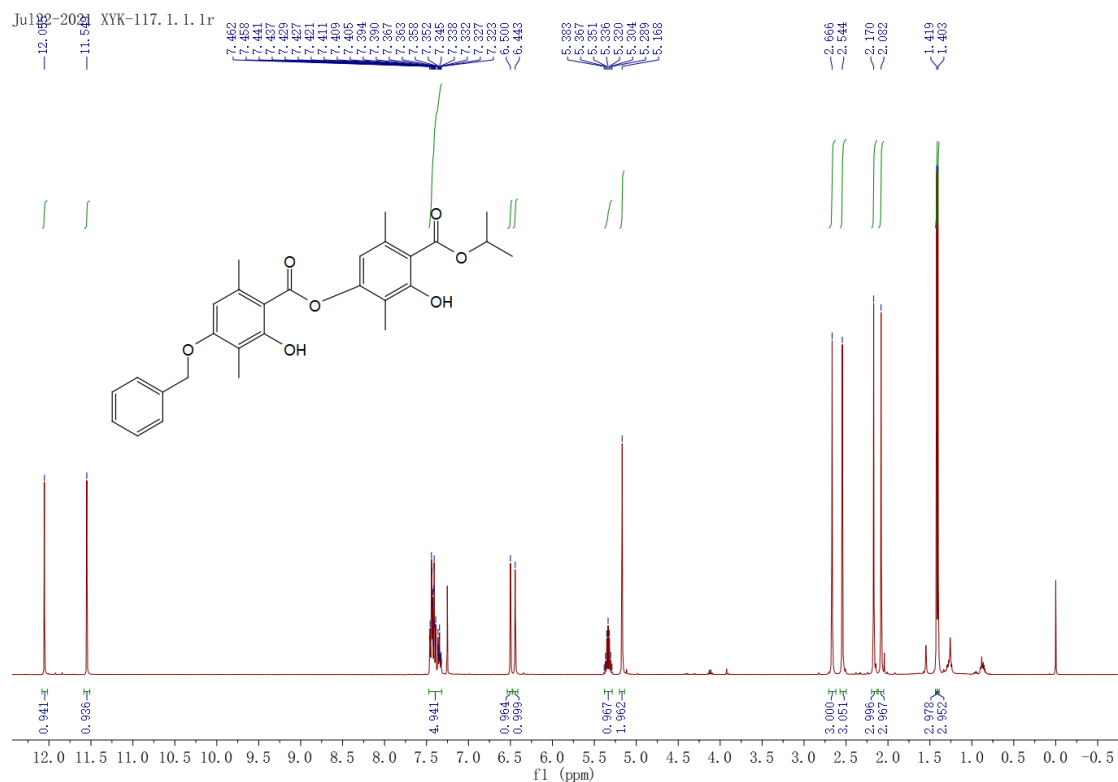

**Figure S116. <sup>1</sup>H NMR spectrum of compound **6m'****

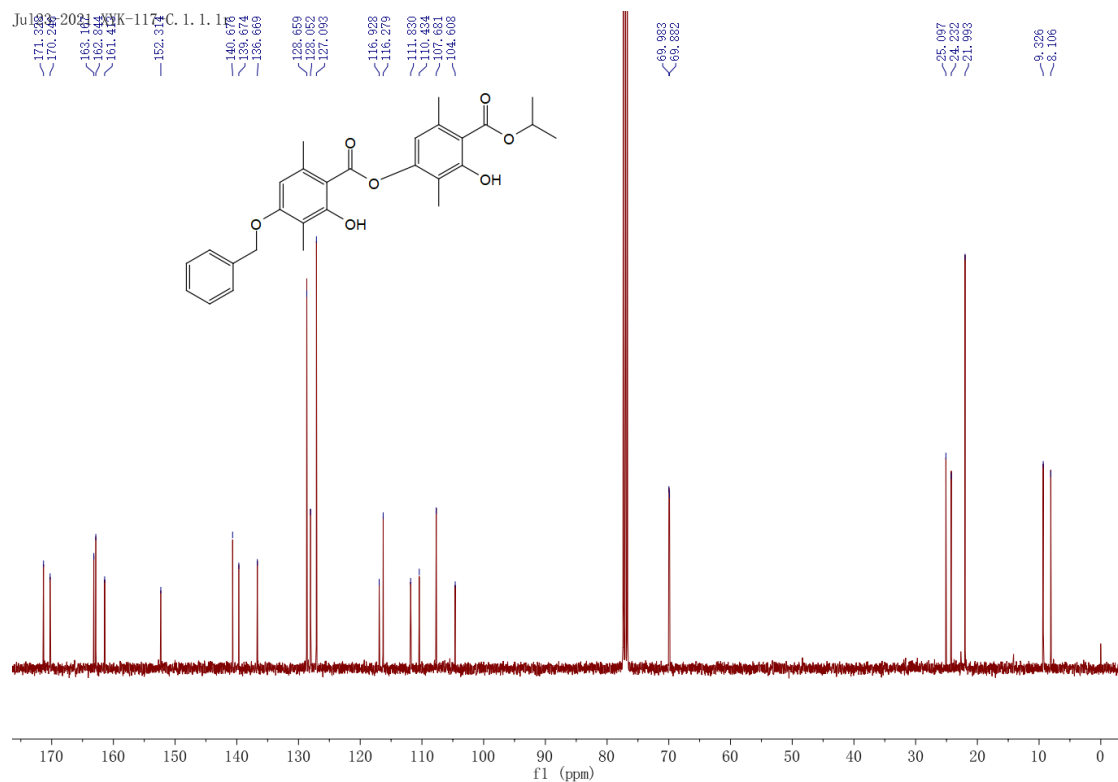

**Figure S117. <sup>13</sup>C NMR spectrum of compound **6m'****

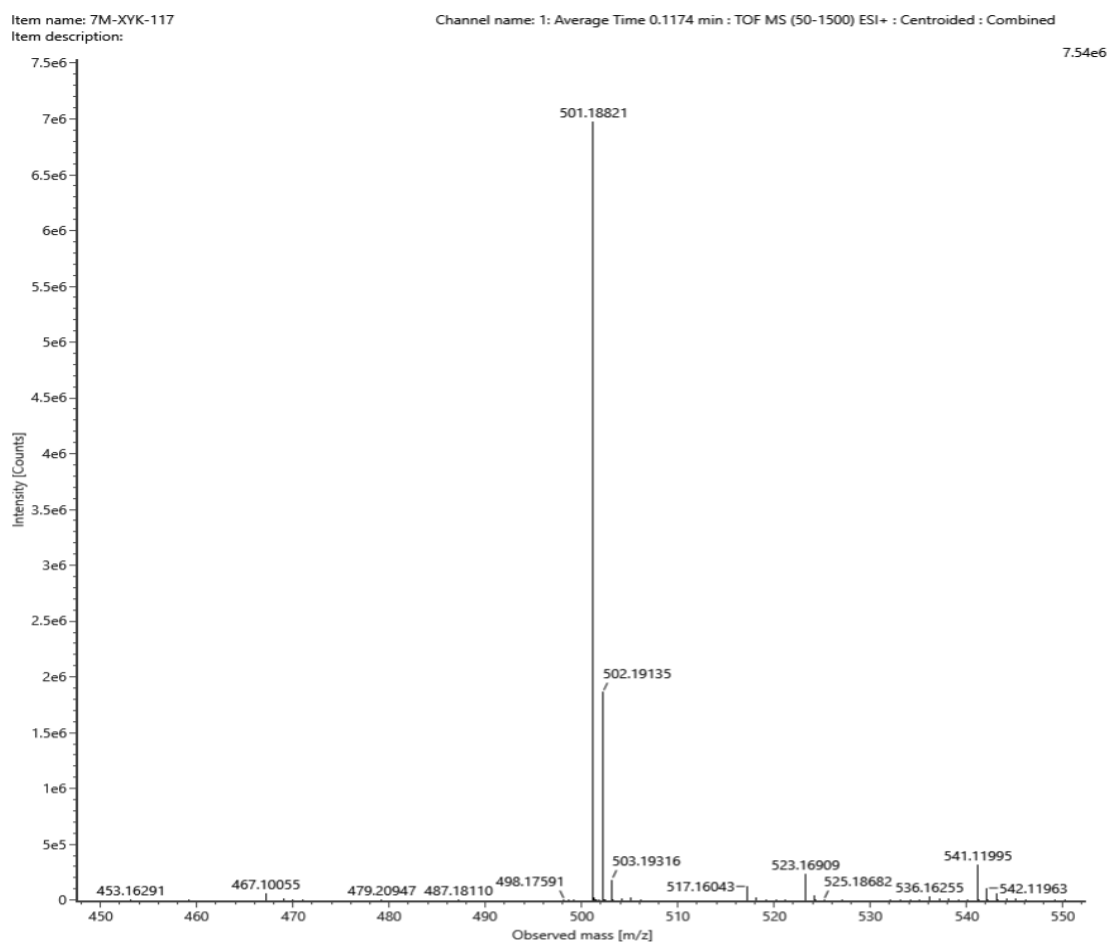

**Figure S118.** HRMS spectrum of compound **6m'**

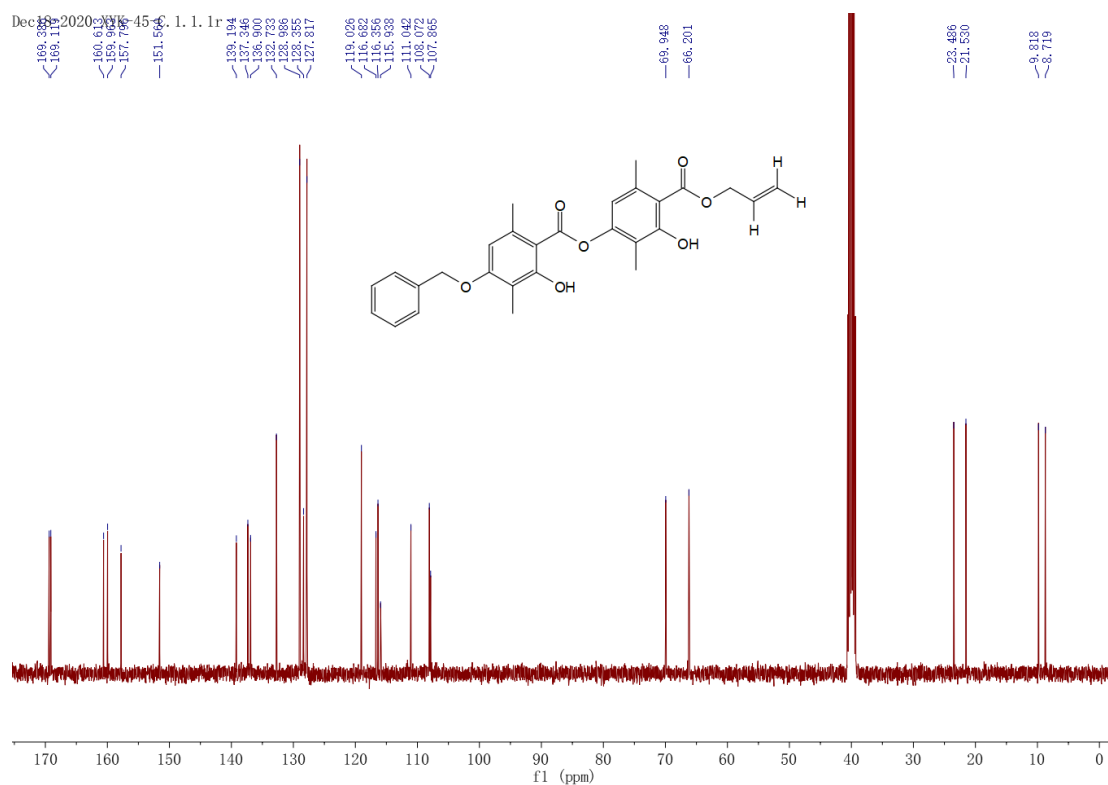

**Figure S119.**  $^1\text{H}$  NMR spectrum of compound **6n'**

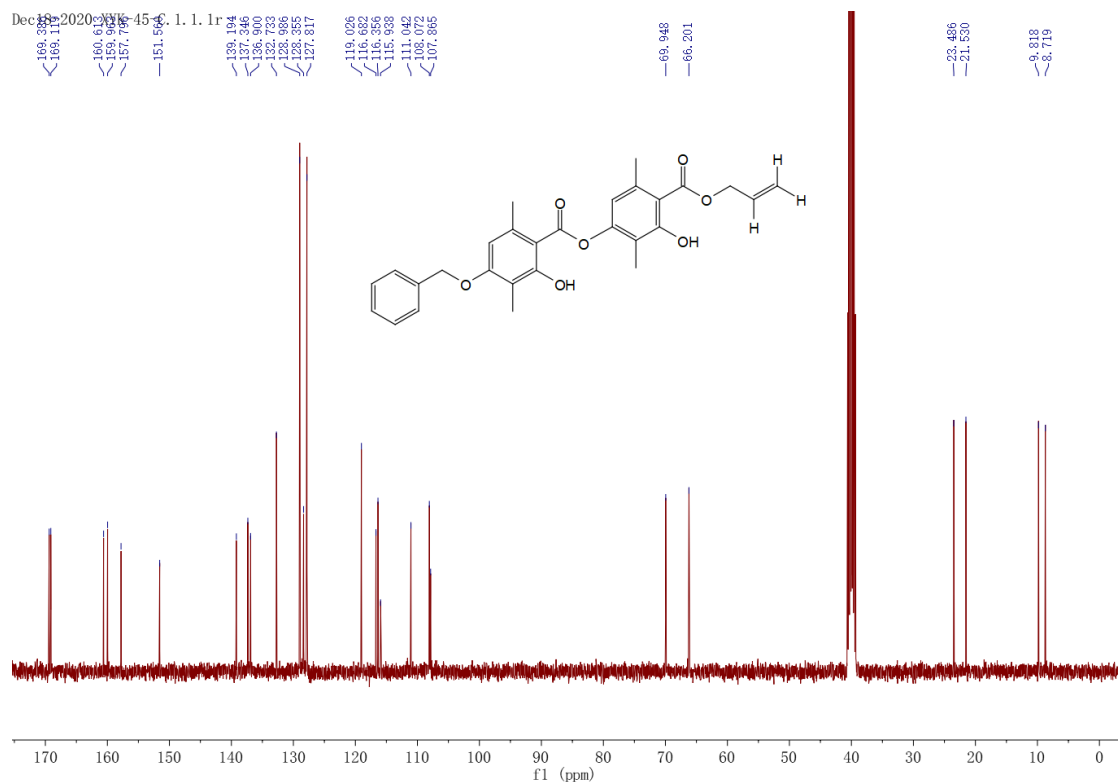

**Figure S120.**  $^{13}\text{C}$  NMR spectrum of compound **6n'**

Item name: 7N-XYK-45  
Item description:

Channel name: 1: Average Time 0.1174 min : TOF MS (50-1500) ESI+ : Centroided : Combined

8.41e6

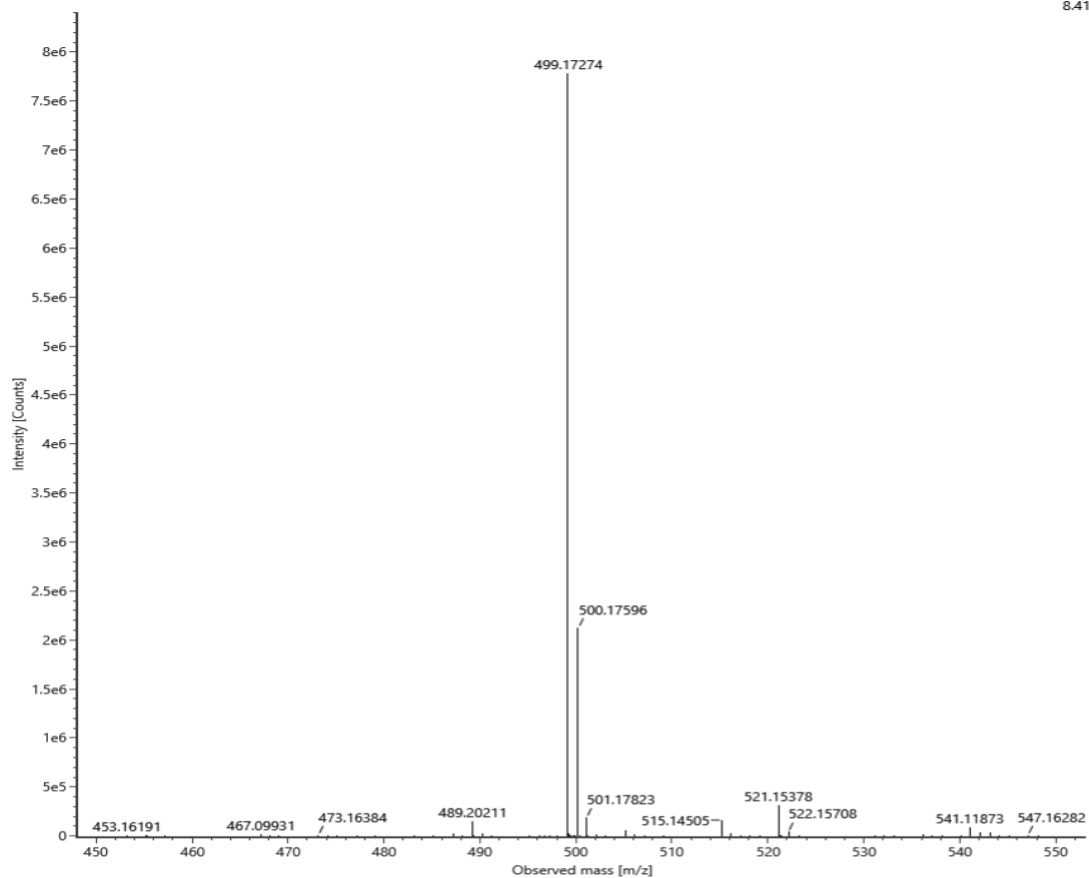

**Figure S121.** HRMS spectrum of compound **6n'**

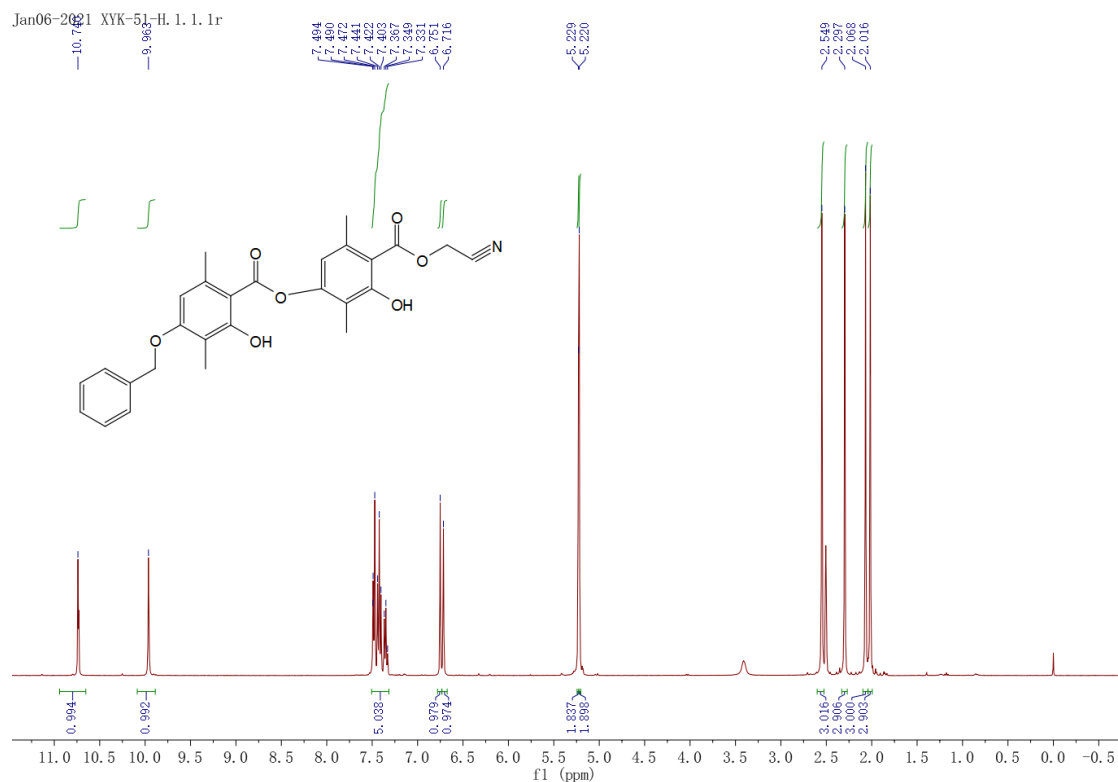

**Figure S122.** <sup>1</sup>H NMR spectrum of compound 60'

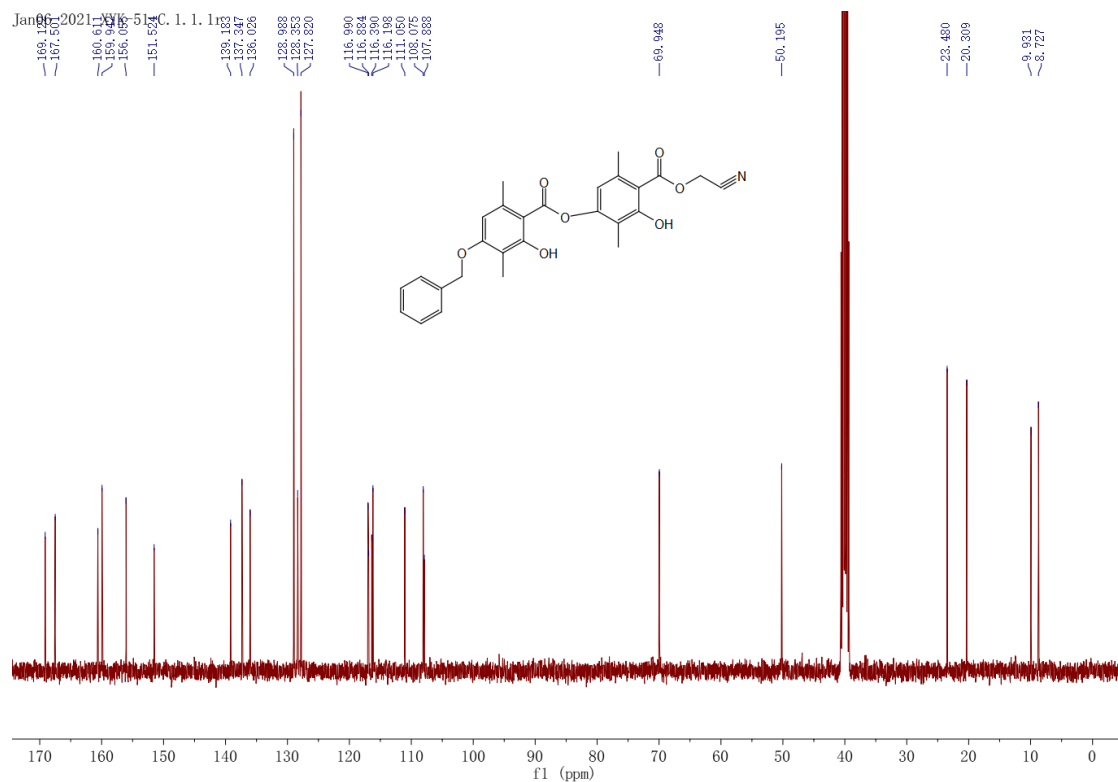

**Figure S123.** <sup>13</sup>C NMR spectrum of compound 60'

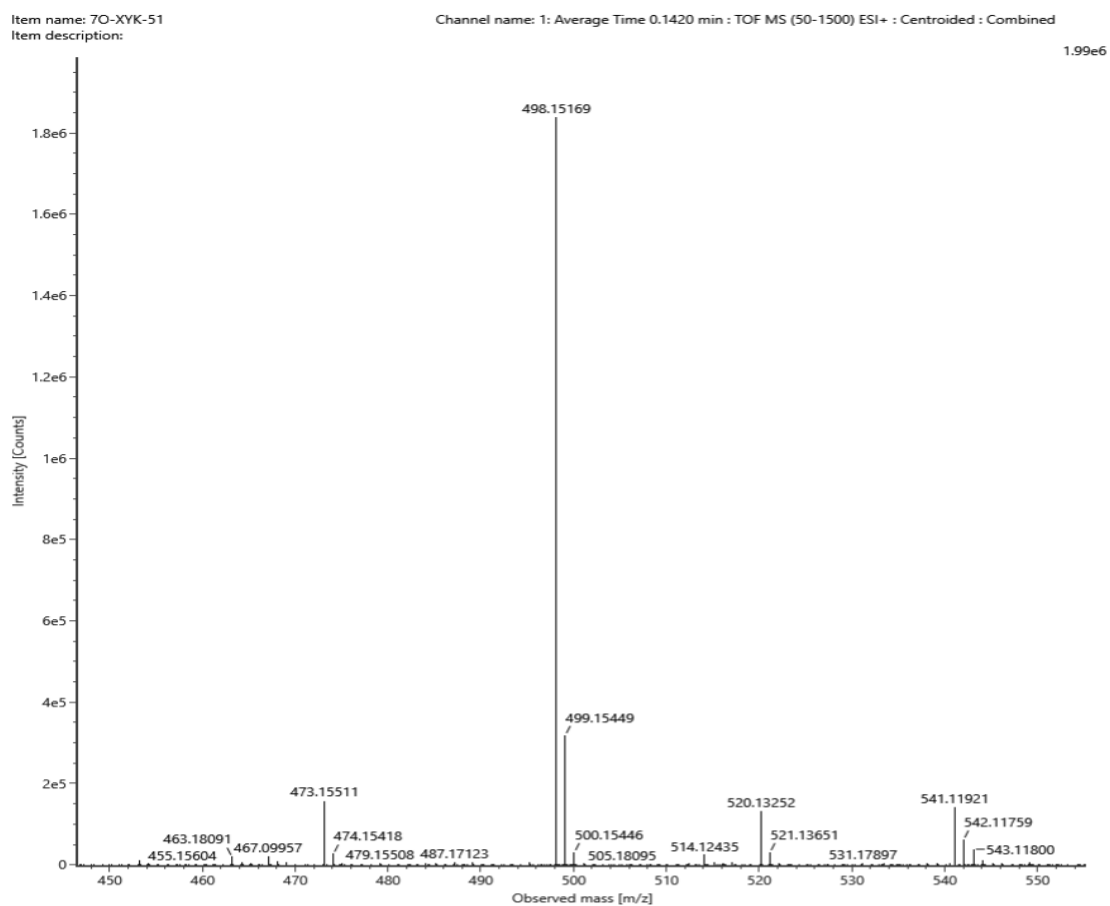

Figure S124. HRMS spectrum of compound **60p**

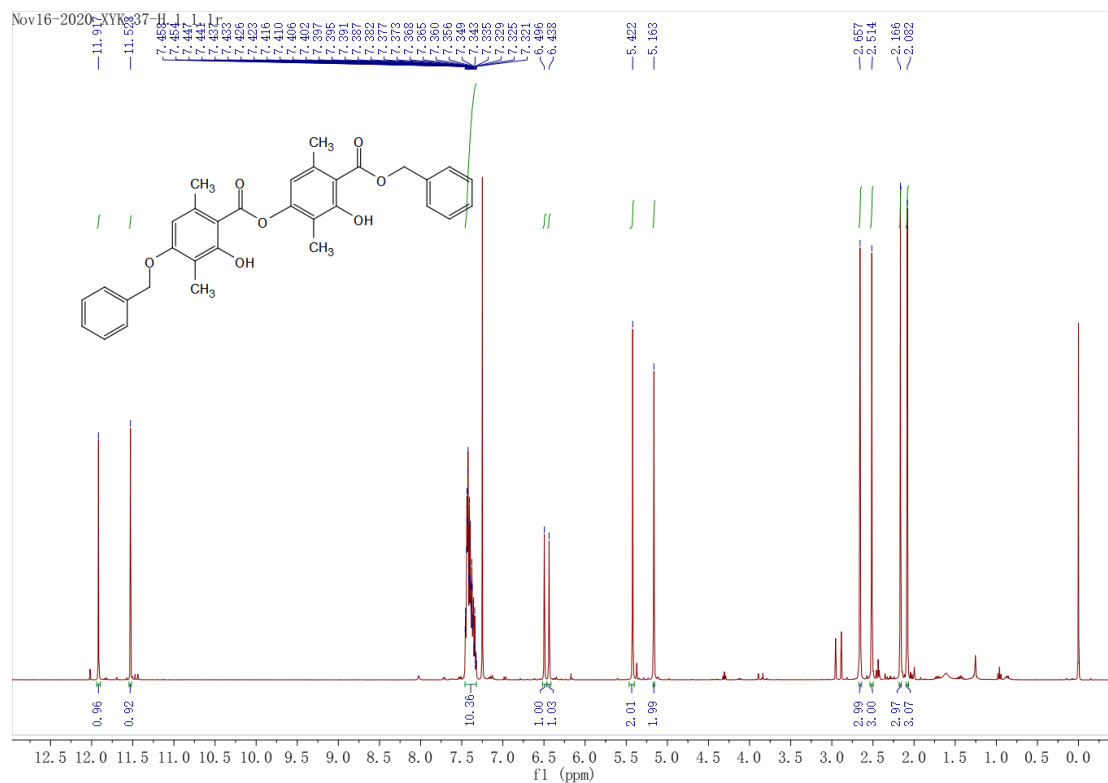

Figure S125.  $^1\text{H}$  NMR spectrum of compound **6p**

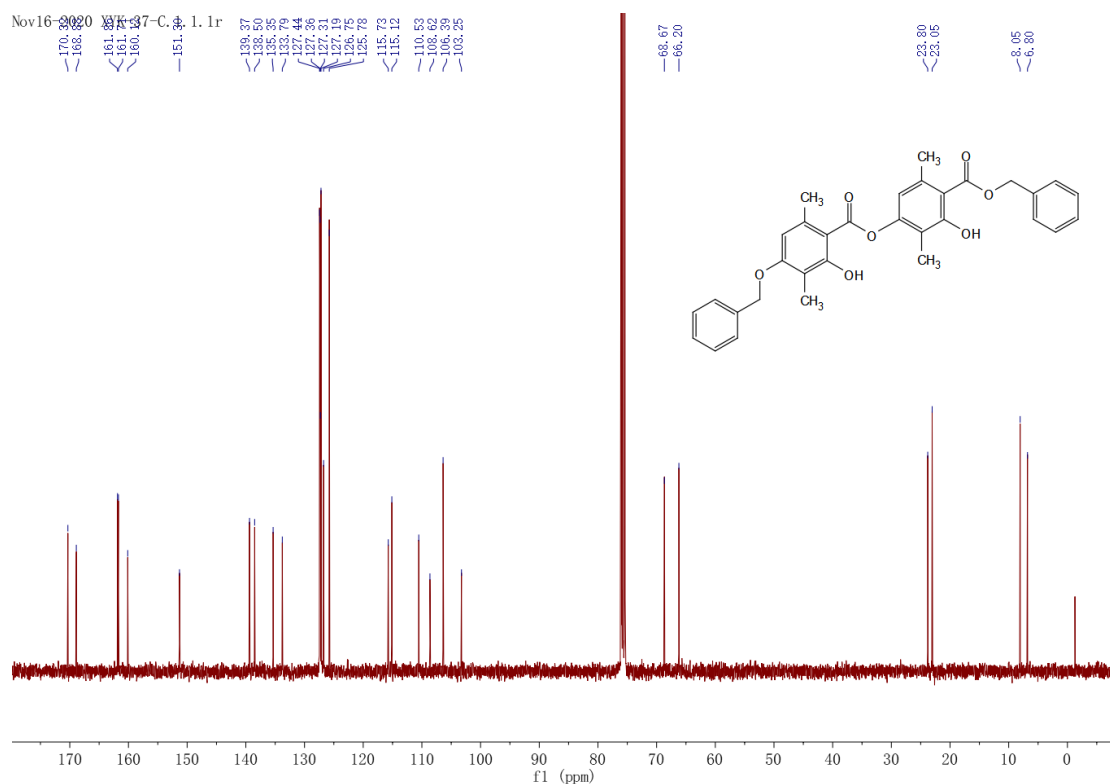

**Figure S126.**  $^{13}\text{C}$  NMR spectrum of compound **6p'**

Item name: 7P-XYK-37  
Item description:

Channel name: 1: Average Time 0.1174 min : TOF MS (50-1500) ESI+ : Centroided : Combined

3.19e6

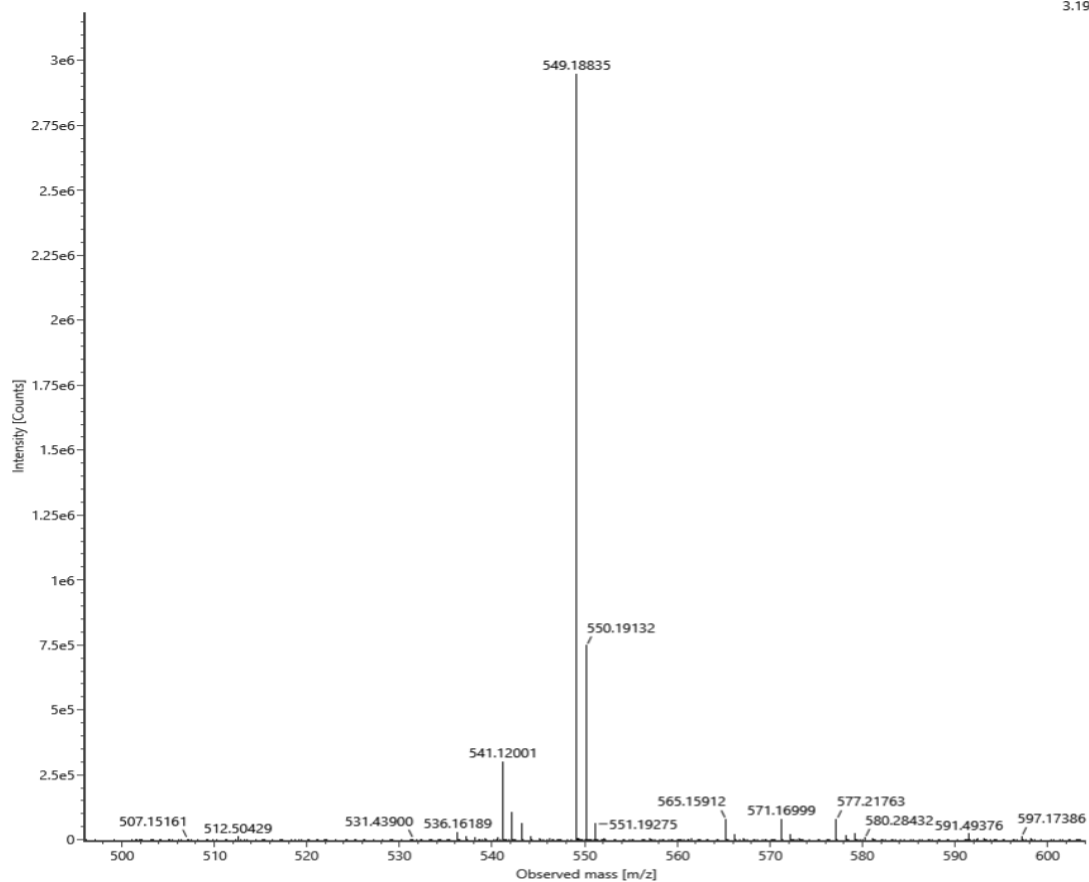

**Figure S127.** HRMS spectrum of compound **6p'**
